# Supplementary material
Source: publisher figshare collection journal article supplement (https://acs.figshare.com/ndownloader/files/26256836)
Supplement: Supplementary file 1 [file 26256836]

# Electronic Supporting Information (ESI)

## **C-H Amidation and Amination of Arenes and Heteroarenes with Amide and Amine using Cu-MnO as a Reusable Catalyst under Mild Condition**

*Harshvardhan Singh, Chiranjit Sen, Eringathodi Suresh, Asit B. Panda\* and Subhash C.*

*Ghosh\**

Central Salt and Marine Chemicals Research Institute (CSIR-CSMCRI), G.B. Marg,  
Bhavnagar 364002, Gujarat, India, and Academy of Scientific and Innovative Research  
(AcSIR), Ghaziabad 201002. E-mail: [scghosh@csmcri.res.in](mailto:scghosh@csmcri.res.in)

## Contents

|                                                                                    |         |
|------------------------------------------------------------------------------------|---------|
| 1. Synthesis and Characterization results of Cu-MnO catalysts                      | S2-S9   |
| 2. KIE experiments and optimization table                                          | S10     |
| 3. $^1\text{H}$ and $^{13}\text{C}$ NMR spectral copies of amidation and amination | S11-S57 |
| 4. X-ray crystallographic data                                                     | S58-S63 |

## 1. Synthesis and Characterization results of Cu-MnO catalysts:

The catalyst was synthesized based on ethylene glycol mediated preparation of Mn-carbonate precursor followed by calcination to  $\text{MnO}_2$ . Then, the Cu-MnO catalyst was synthesized through impregnation of Cu on  $\text{MnO}_2$  by deposition precipitation method using Cu-acetate followed by calcination under 5%  $\text{H}_2$  in  $\text{N}_2$  flow at  $350^\circ\text{C}/6\text{h}$  in. XRD pattern of the synthesized 5% Cu-MnO catalyst evidenced the presence of distinct diffraction peaks, ascribed to the face-centered cubic MnO phase (manganosite, JCPDS Card 00-075-1090). In addition to the intense peaks, the very low intense peak at  $2\theta = 43.7^\circ$  was also observed. The low intense peak is attributed to the (111) plane of cubic metallic Cu. Thus, the XRD results imply the reduction of  $\text{Mn}^{4+}$  to  $\text{Mn}^{2+}$  and  $\text{Cu}^{2+}$  to  $\text{Cu}^0$  during calcination in 5%  $\text{H}_2$  in  $\text{N}_2$ , a reducing environment. Large area SEM image evidenced the formation of quite uniform spherical morphology. Corresponding high-magnified image evidenced that the individual spheres are made of individual small particles. Respective low magnified TEM images also evidenced the presence of spherical microstructures made of very small particles. TEM image also evidenced that the formed spheres are porous. Respective magnified images showed the presence of nanoparticles with a size range of 15-20 nm and the pores are nothing but the inter-particle pores. HRTEM image indicates the presence of distinct fringes with inter planer distance of 0.26 nm, corresponds to the (111) plane of face-centred cubic MnO (JCPDS Card 00-075-1090). In the HRTEM image some odd lattice fringe (other than 0.26 nm) was observed in the wall of larger particle. Detailed investigation explores the inter-planer distance is 0.21 nm, corresponds to the (001) plane of cubic metallic copper. Thus, TEM image confirmed the formation of highly crystalline 15-20 nm MnO with very small Cu nanoparticle on the surface. Elemental mapping

of the synthesized catalyst evidenced uniform

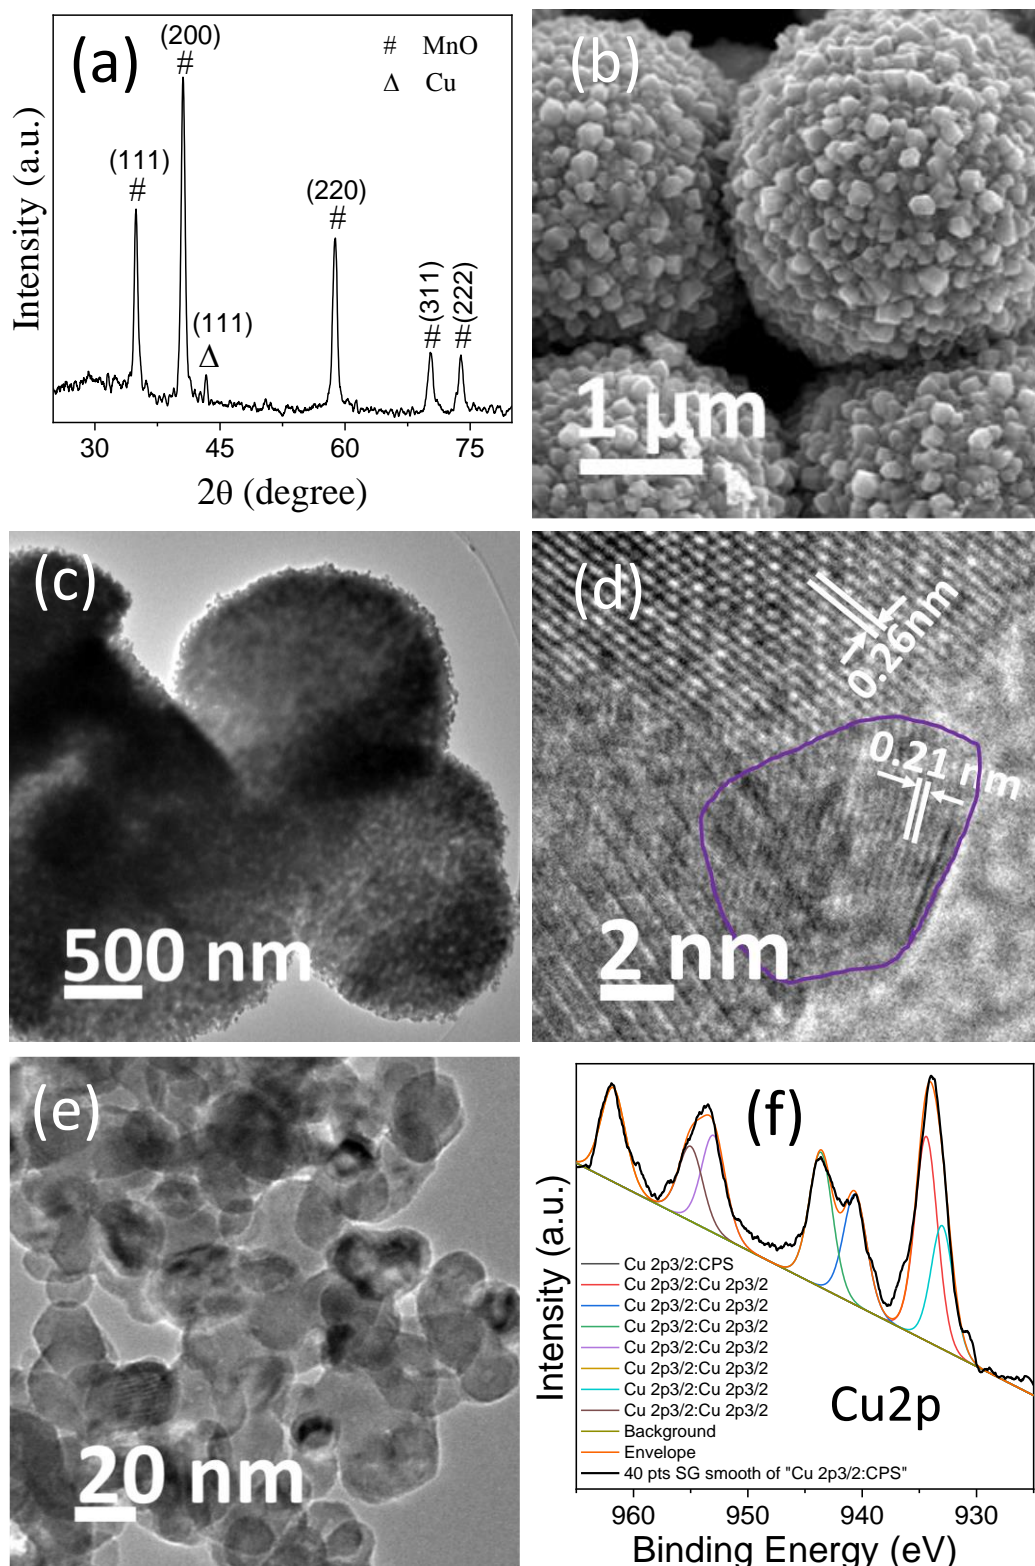

**Figure S1:** (a) XRD pattern of synthesized Cu-MnO, (b) SEM, (c) TEM, (d-e) HRTEM images of Cu-MnO catalyst, and (f) core level Cu2p XPS distribution of Cu on MnO spheres.



A detailed elemental state was further investigated by X-ray photoelectron (XPS) analysis. The survey spectrum evidenced the presence of both Mn and Cu. Best Gaussian fitted Cu2p spectrum evidenced presence of distinguishable several peaks in the region of 925–970 eV. Among these identifiable peaks, the peaks at 930.7 and 951.6 eV is recognized as either Cu<sup>0</sup> or Cu<sup>1+</sup>. However, the presence of a distinct Cu-LMM signal at 568.2 eV confirmed that both the mentioned peaks at 930.7 and 951.6 eV are for Cu<sup>0</sup>. Another set of peaks at 933.06 and 953.3 eV along with spin splitting peak at 961.11 eV can be recognized to Cu<sup>2+</sup>. Two satellite peaks of Cu at has also been observed in 938–945 eV region. Two peaks at 640.3 eV and 651.9 eV having energy gap of 11.6 eV for Mn 2p and peaks at 81.82 and 88.20 eV with energy gap of 6.3 eV also confirmed the presence of Mn<sup>2+</sup>. Thus, catalyst characterization results confirmed the formation of porous MnO spheres having uniformly dispersed Cu<sup>0</sup> and Cu<sup>2+</sup> species.

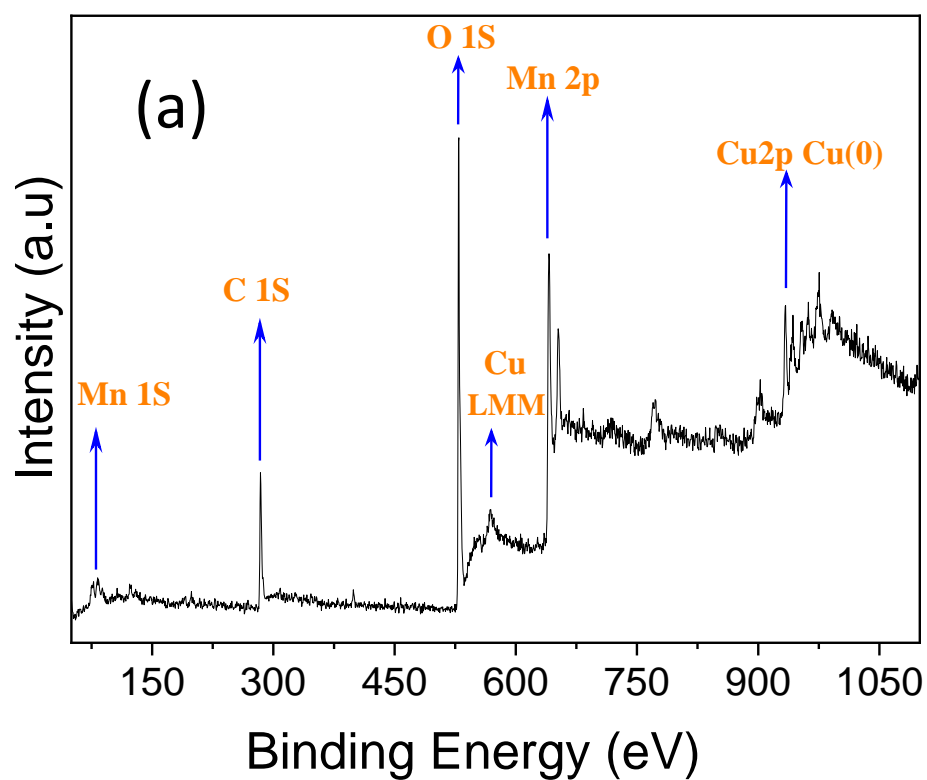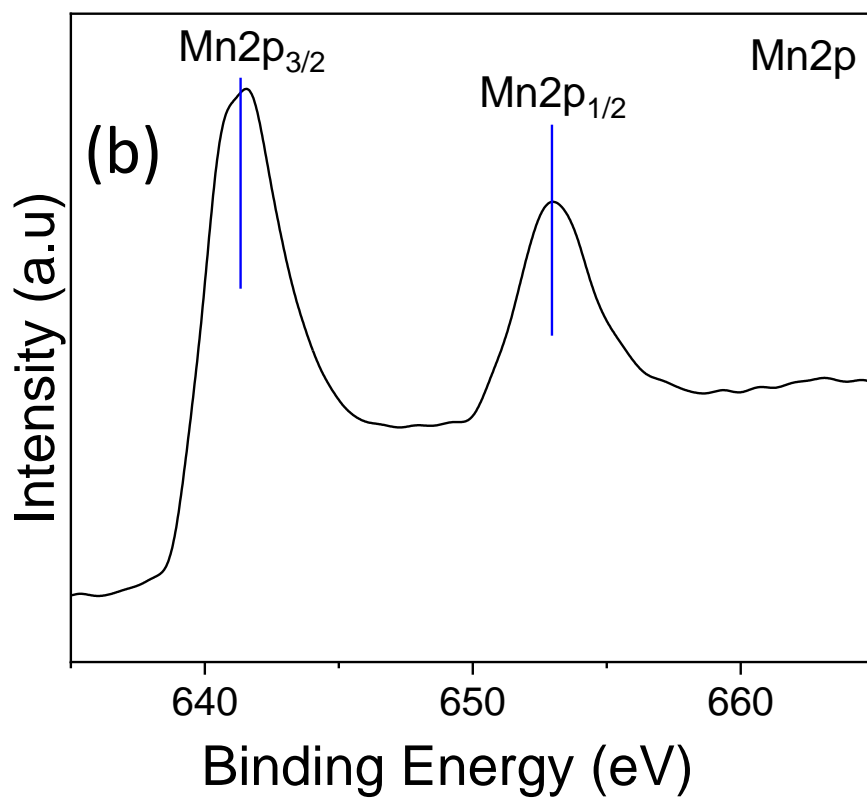

**Figure S2:** XPS spectra of 5% Cu-MnO

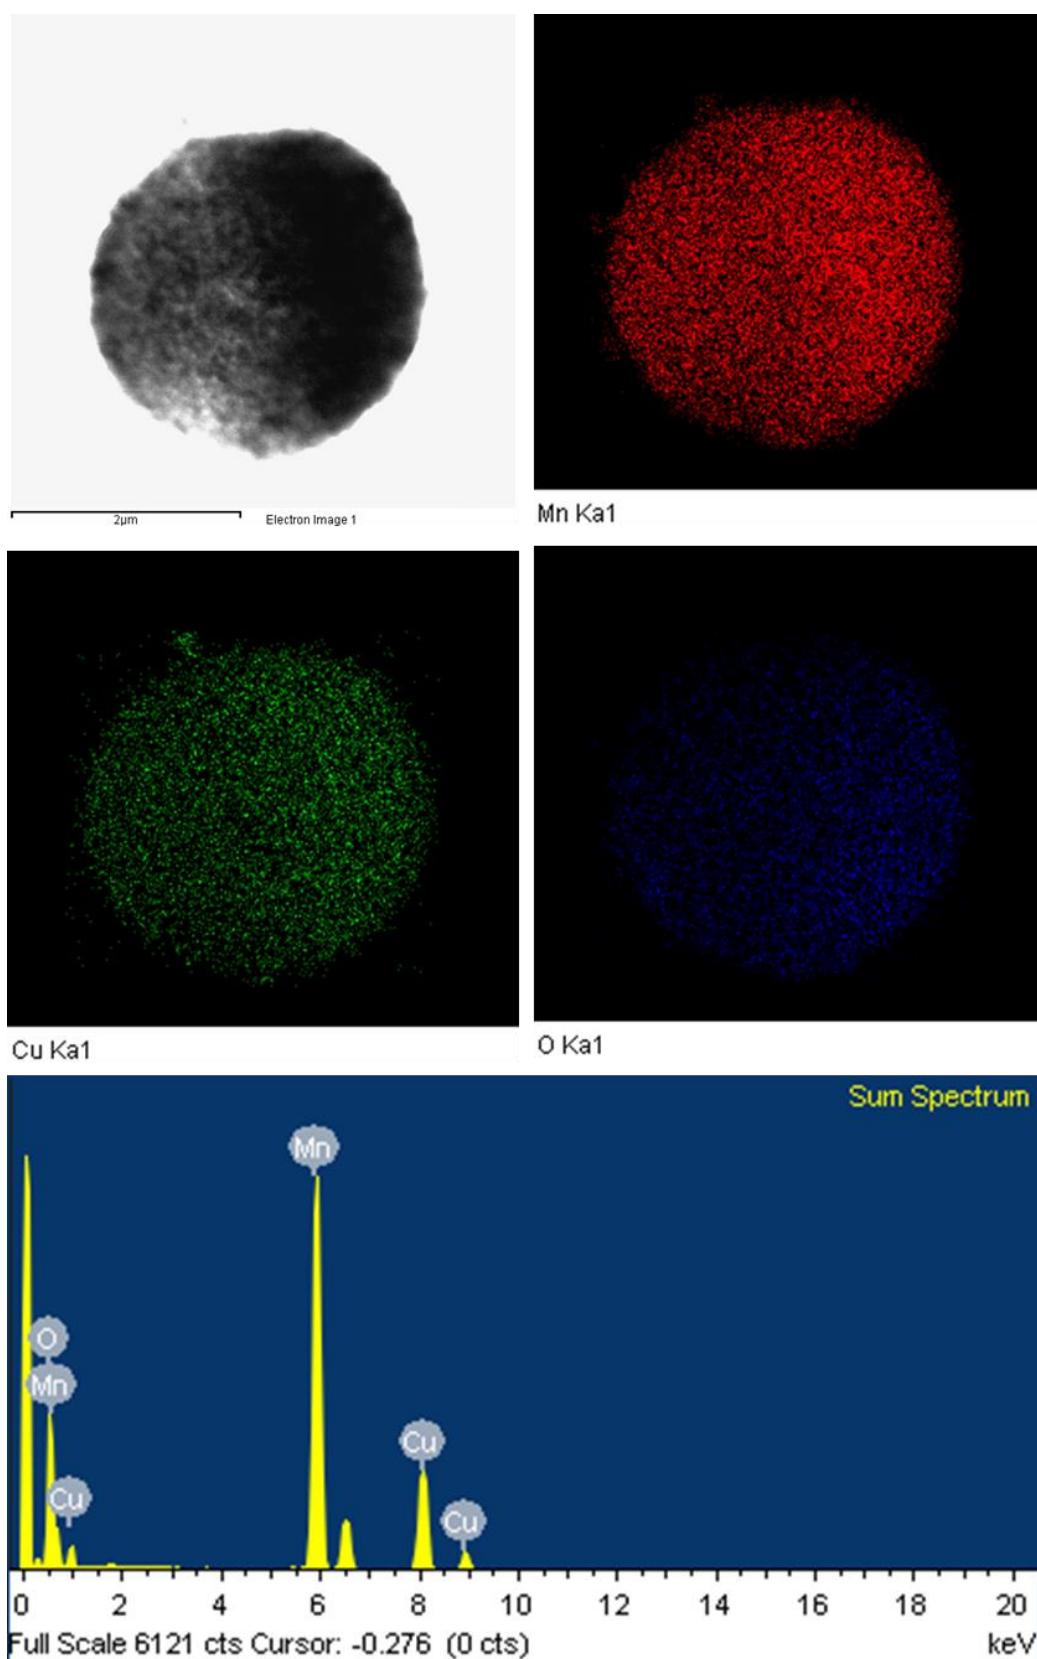

**Figure S3:** EDS SEM images of the synthesized 5% Cu-MnO catalyst, showed the homogeneous distribution of Copper on the manganese oxide surface

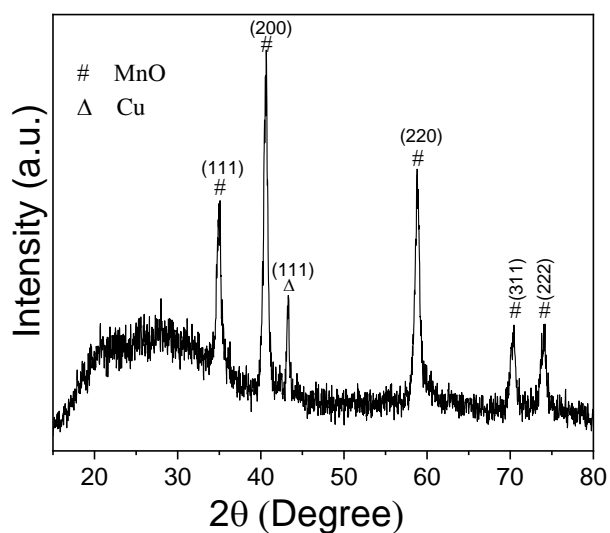

**Figure S4:** XRD pattern of re-used catalyst evidenced that no distinct change in the crystal structure of MnO took place. However, the peak intensity of Cu was increased, most probably due to the particle growth of metallic Cu during cycling. The broad hump in the  $2\theta$  range of 20-30 due to the adsorbed carbonaceous organic substrates.

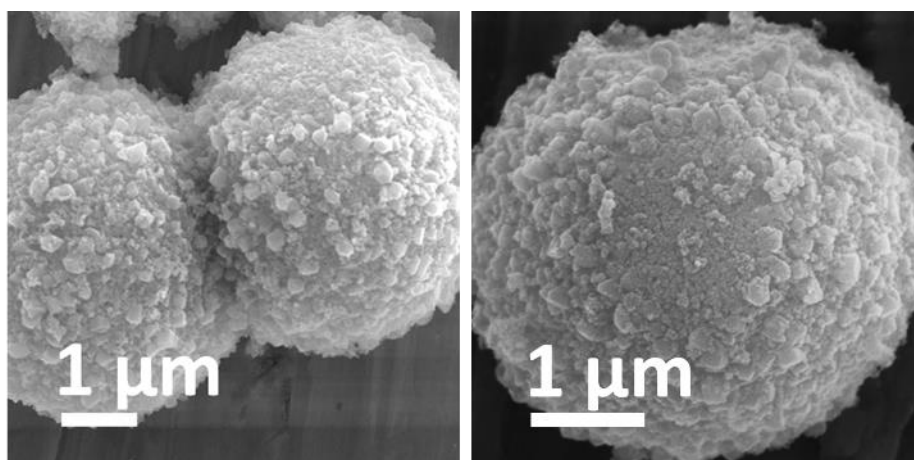

**Figure S5:** SEM images of the reused catalyst

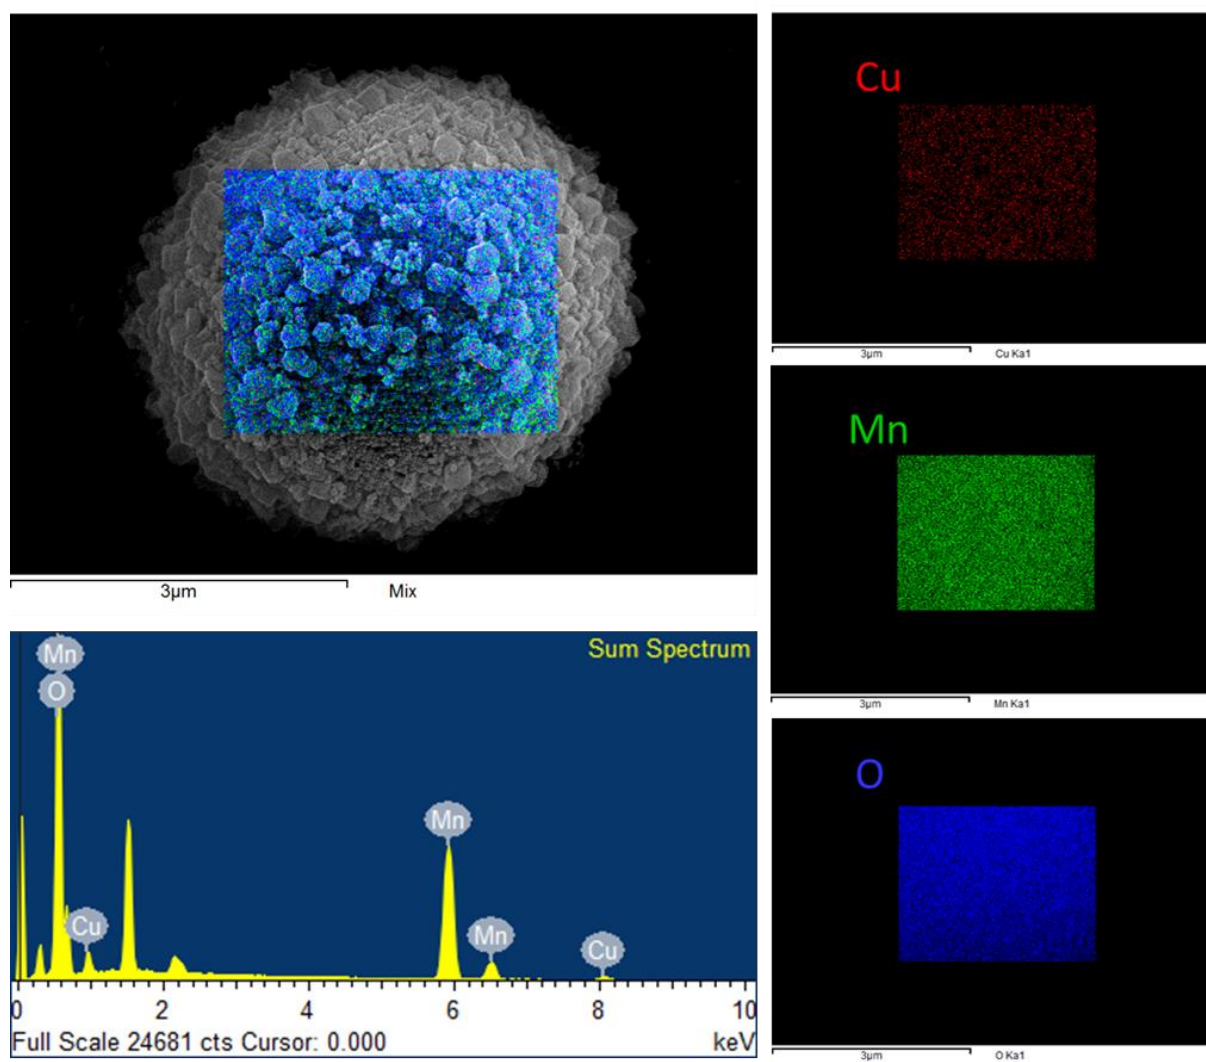

**Figure S6:** EDS SEM images of the reused 5% Cu-MnO catalyst, showed homogeneous distribution of Copper on manganese oxide surface after the reaction

## 2. KIE experiments

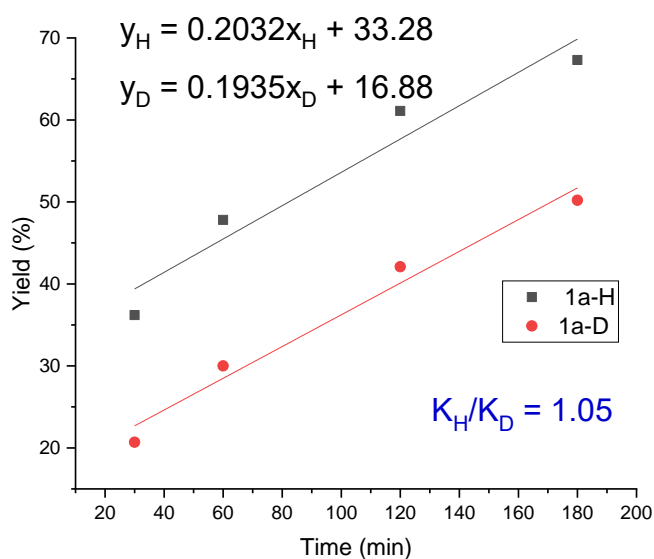

**Figure S7.** Determination of KIE by independent parallel experiments with **1a** and deuterated **1a**

**Table S1:** Reaction optimization

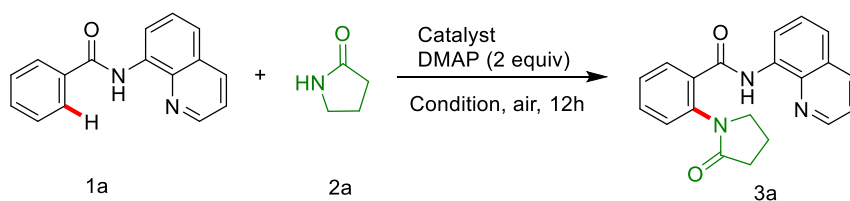

| Entry | Catalyst | Base                            | Solvent | Temp. (°C) | Yield (%) <sup>b</sup> |
|-------|----------|---------------------------------|---------|------------|------------------------|
| 1     | 5% CuMnO | DMAP                            | DMSO    | 120        | 94                     |
| 2     | 5% CuMnO | DMAP                            | DMSO    | 120        | 48 <sup>[c]</sup>      |
| 3     | 5% CuMnO | K <sub>2</sub> CO <sub>3</sub>  | DMSO    | 120        | 35                     |
| 4     | 5% CuMnO | Na <sub>2</sub> CO <sub>3</sub> | DMSO    | 120        | 45                     |
| 5     | 5% CuMnO | Et <sub>3</sub> N               | DMSO    | 120        | 38                     |

<sup>a</sup>reaction conditions: 1a (0.2 mmol), 2a (0.3 mmol, 1.5 equiv), Cu-MnO catalyst 25 mg (7.8 mol% Cu), DMAP (2 equiv.), in 1 mL solvent, air, at 120 °C for 12h; <sup>b</sup>isolated yield; <sup>c</sup> under N<sub>2</sub> atmosphere

**3.  $^1\text{H}$  and  $^{13}\text{C}$  NMR spectral copies of amidation and amination:**

**2-(2-oxopyrrodin-1-yl)-N-(quinoline-8-yl)benzamide (3a):**

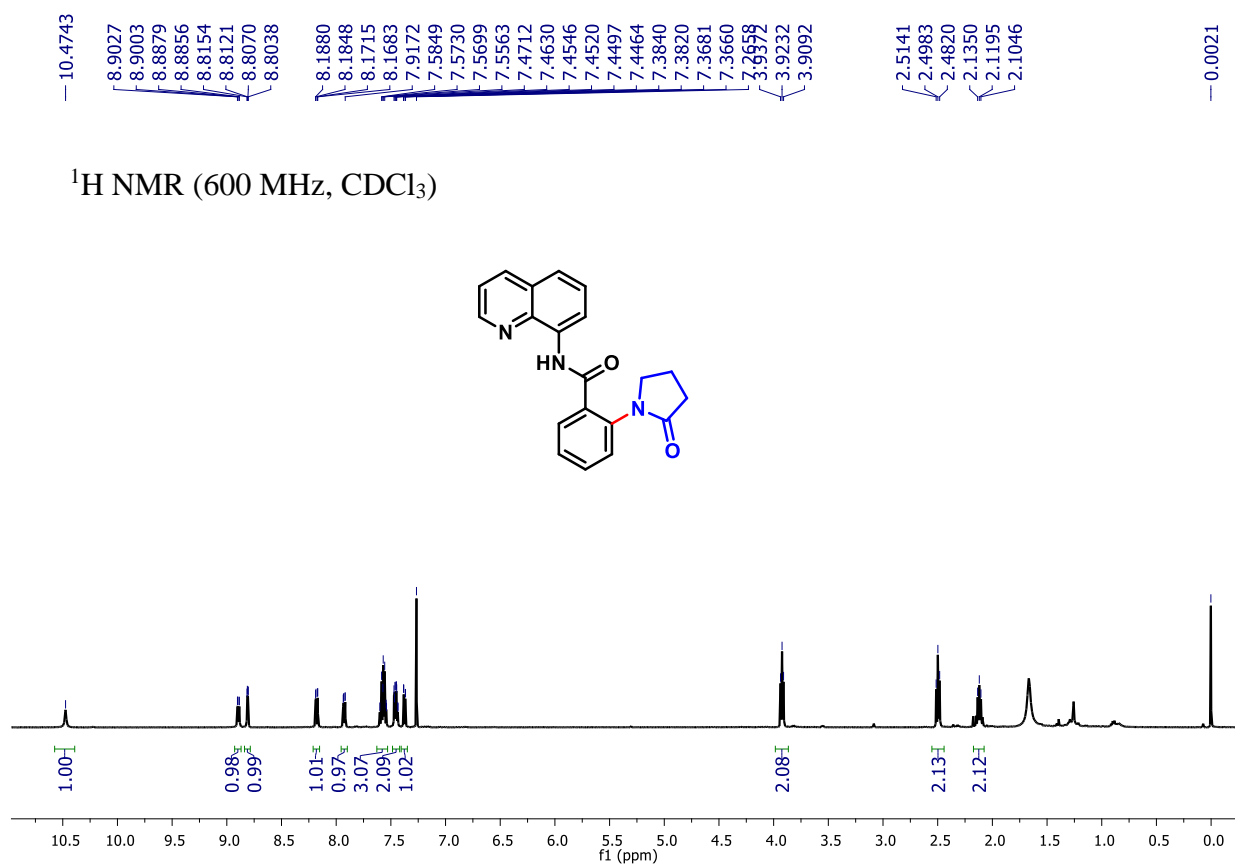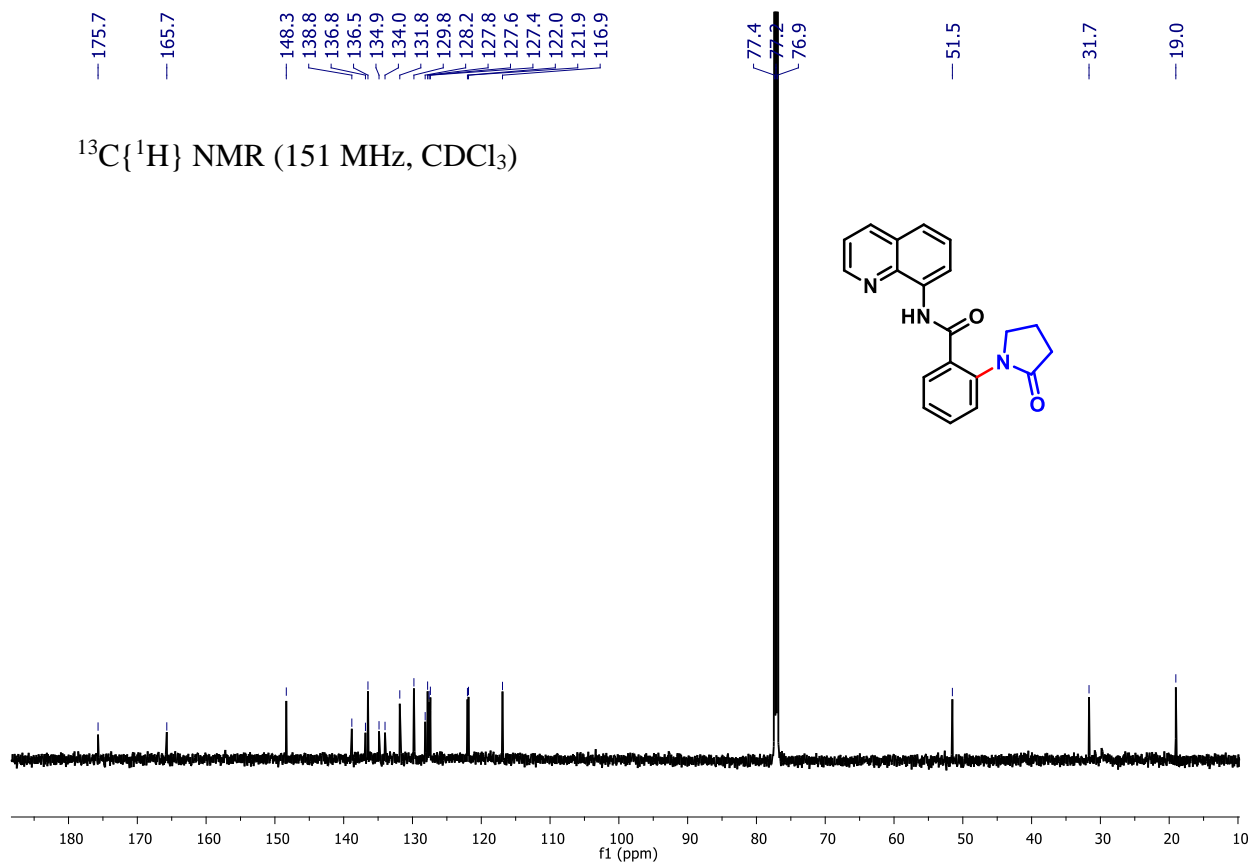



**4-methoxy-2-(2-oxopyrrolidin-1-yl)-N-(quinoline-8-yl)benzamide (3b):**

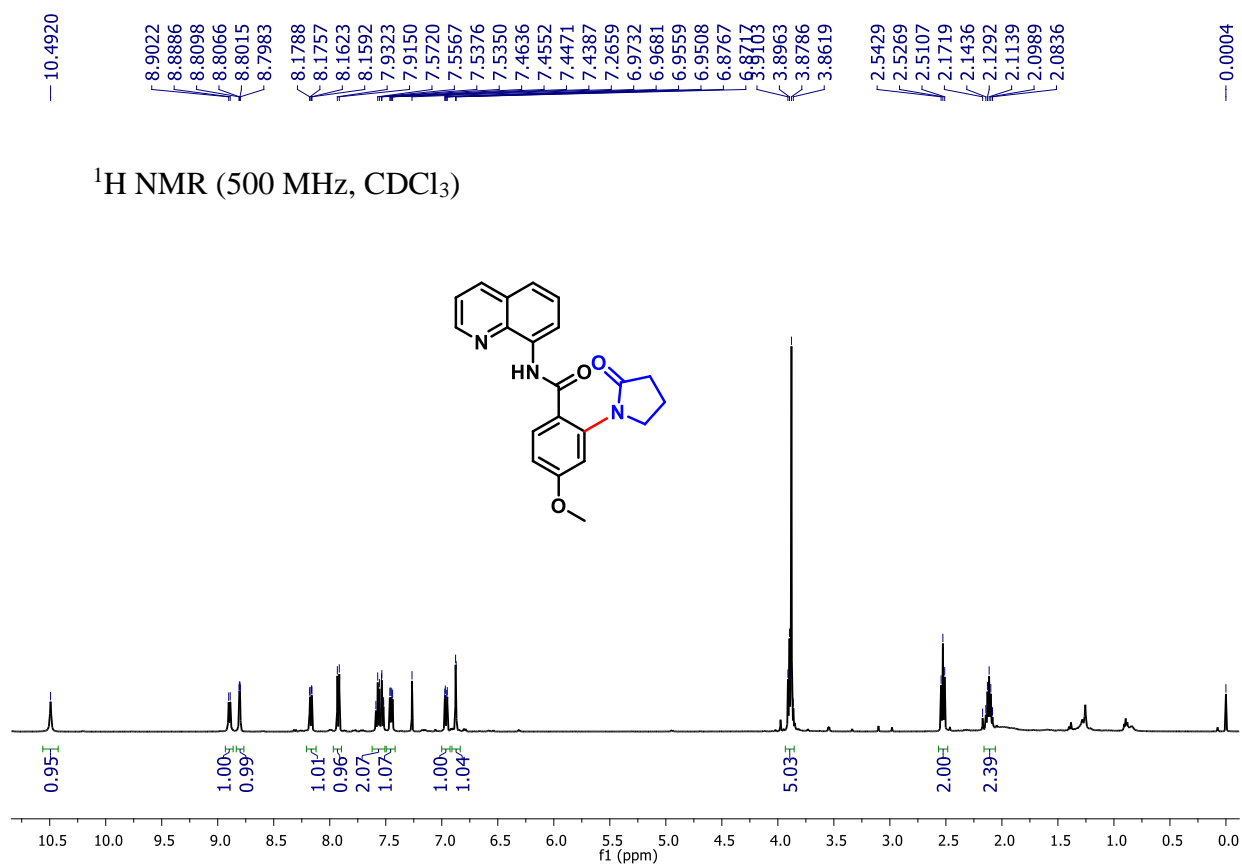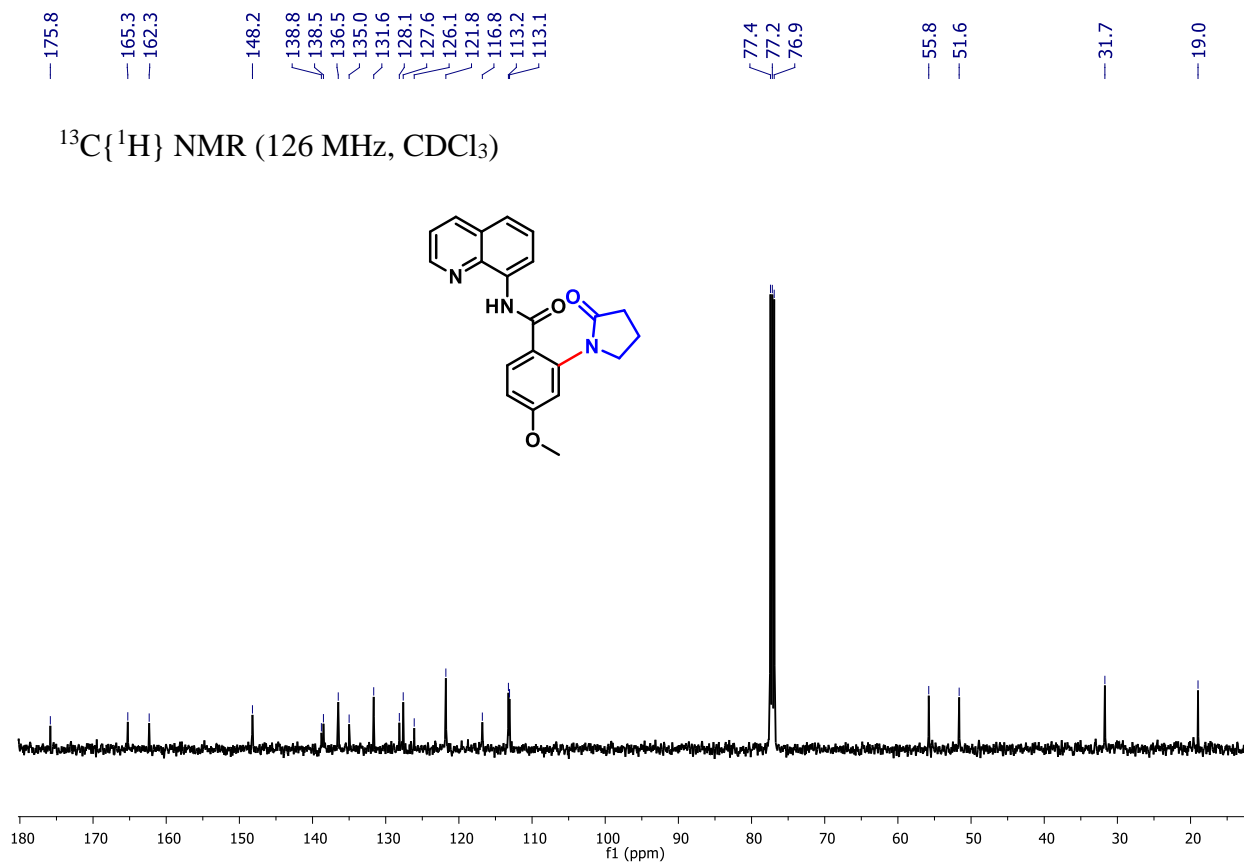

**2-(2-oxopyrrodin-1-yl)-N-(quinoline-8-yl)-4-(trifluoromethyl)benzamide (3c):**

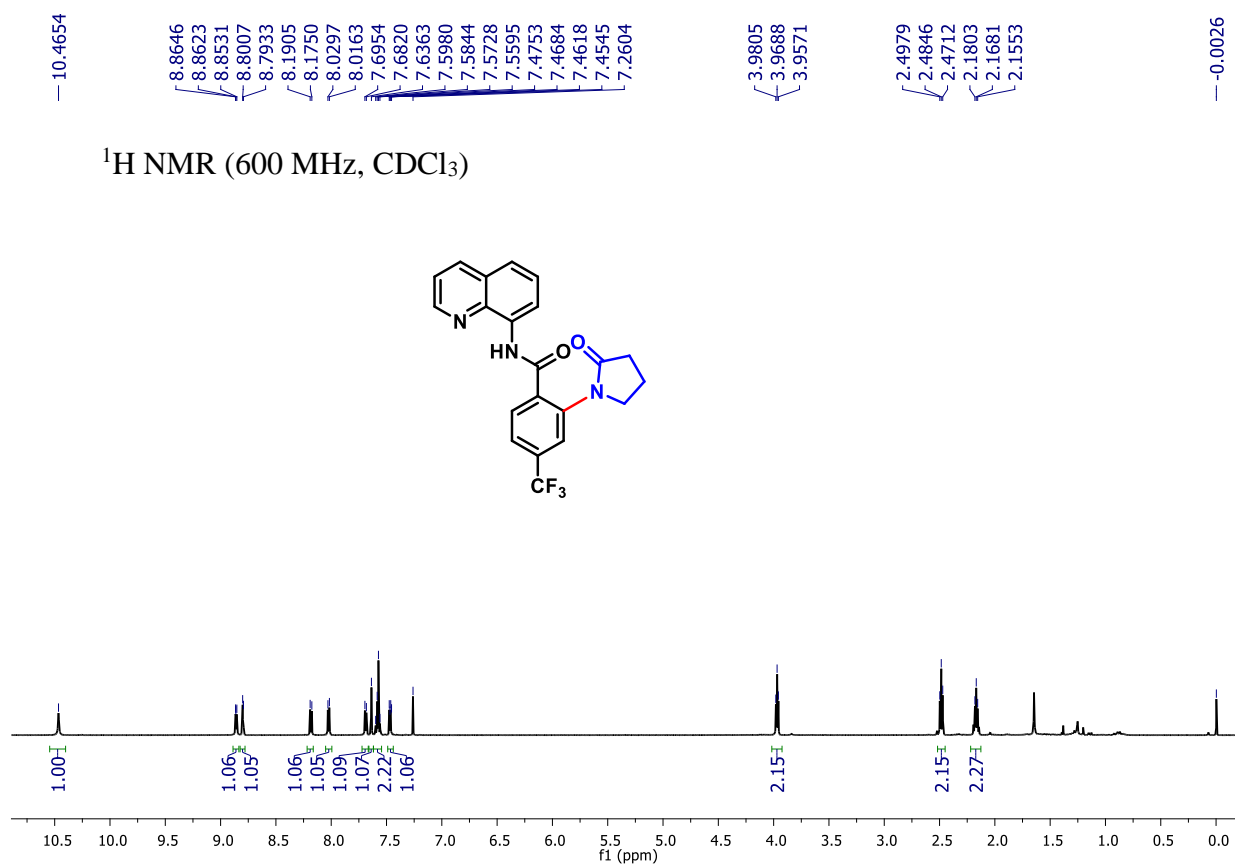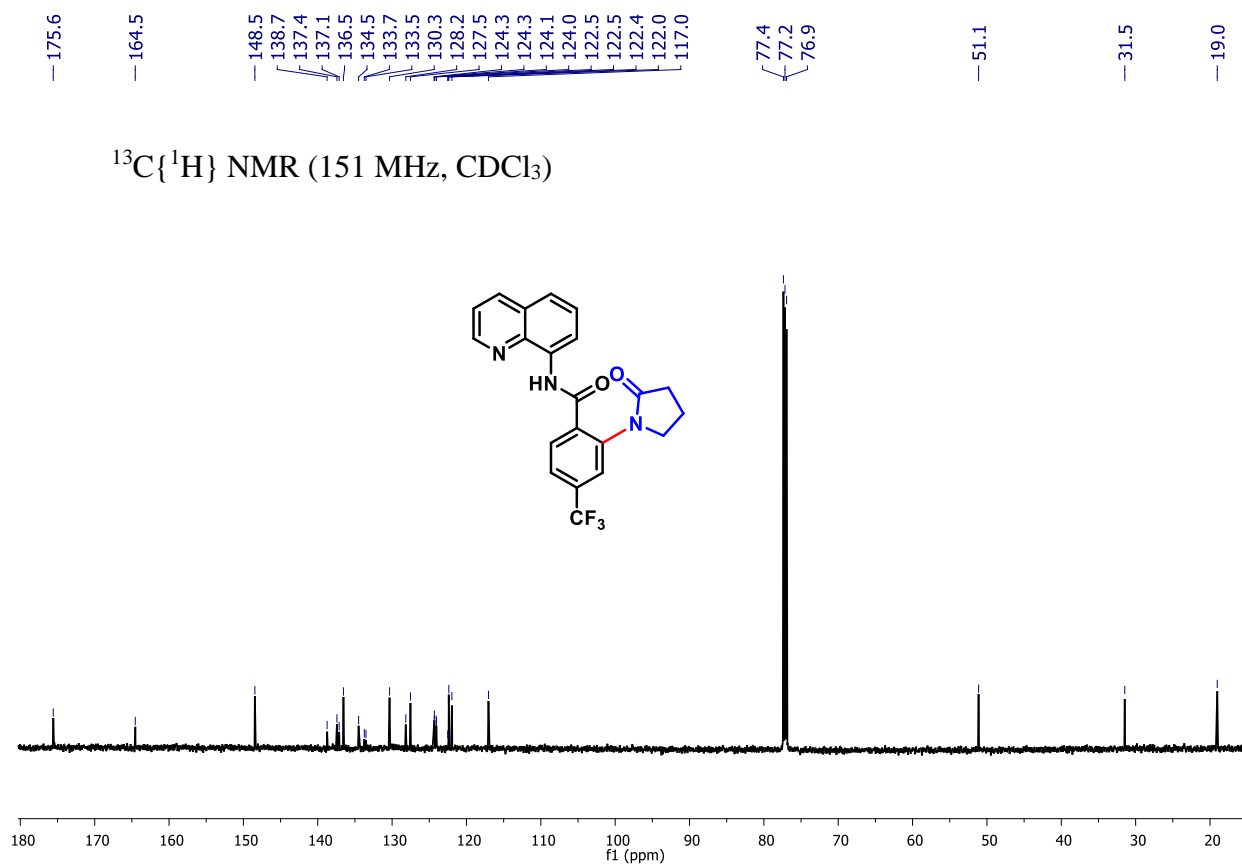

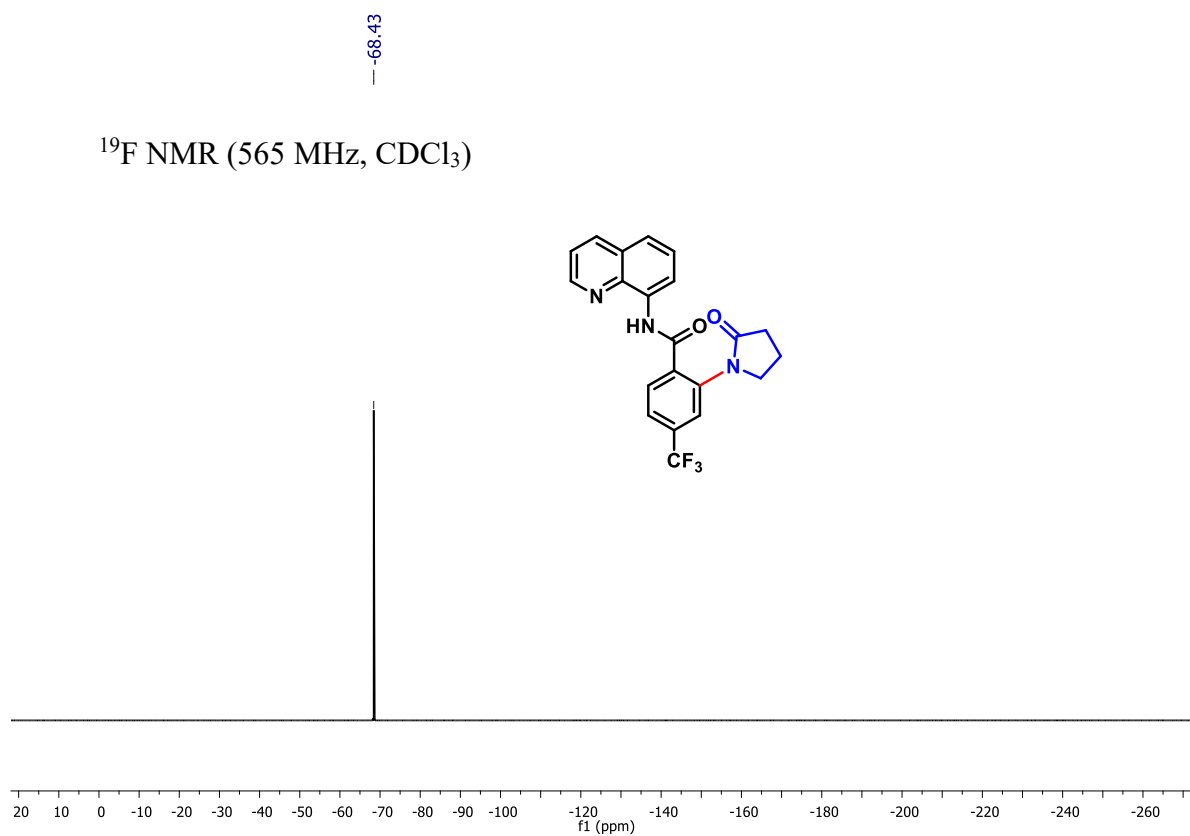

**4-Iodo-6-(2-oxopyrrodin-1-yl)-N-(quinoline-8-yl)benzamide (3d):**

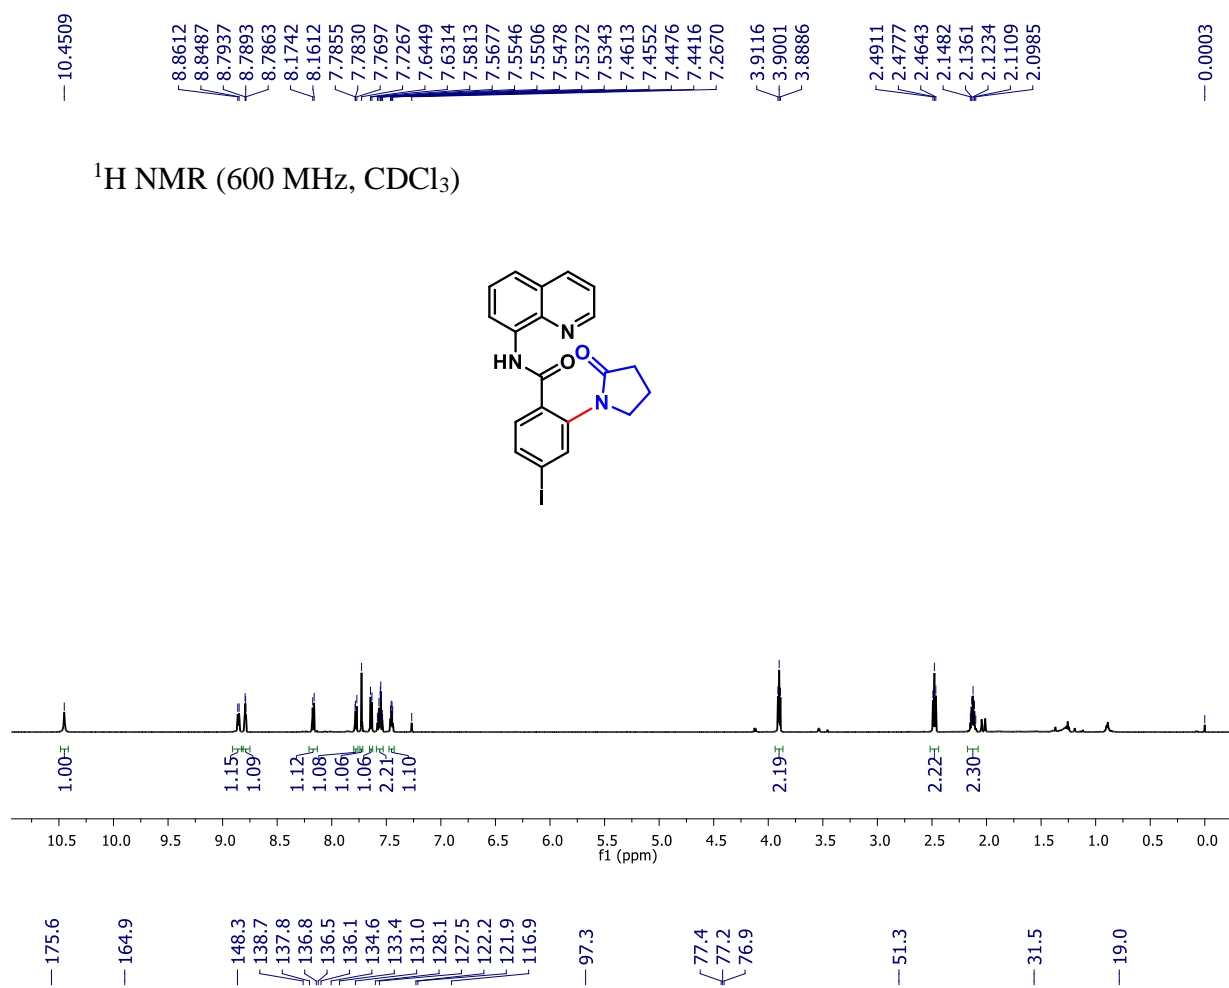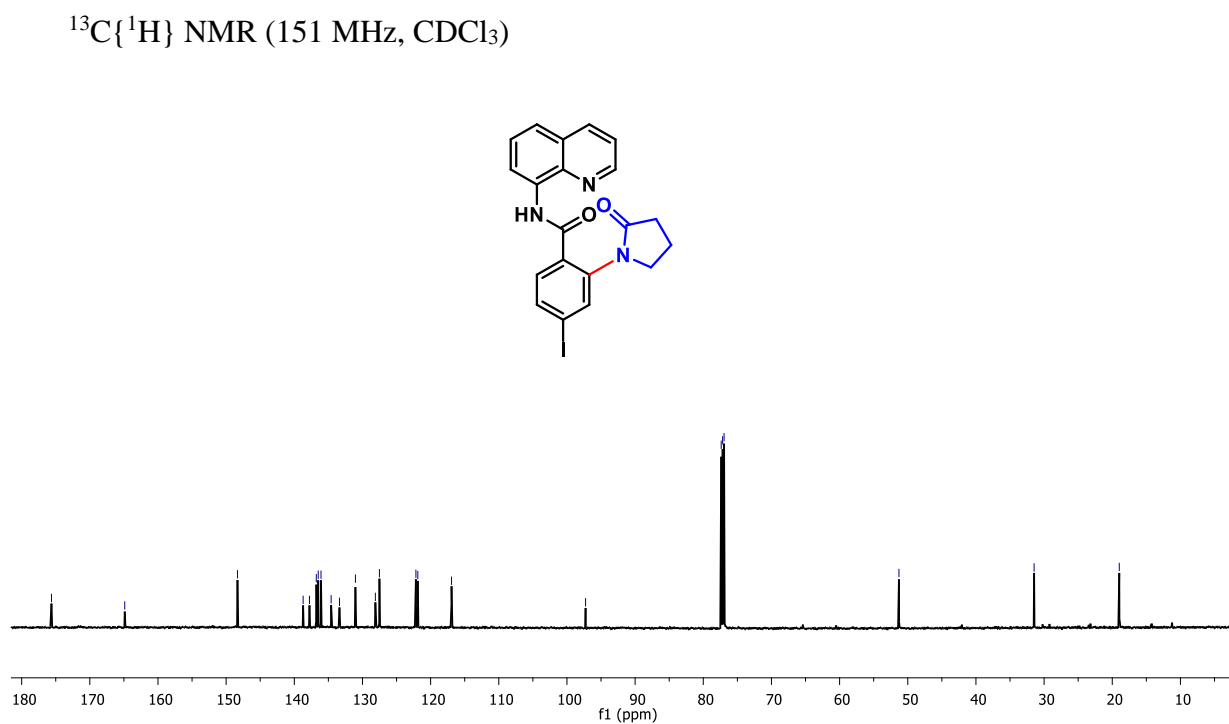

**5-methyl-2-(2-oxopyrrodin-1-yl)-N-(quinoline-8-yl)benzamide (3e):**

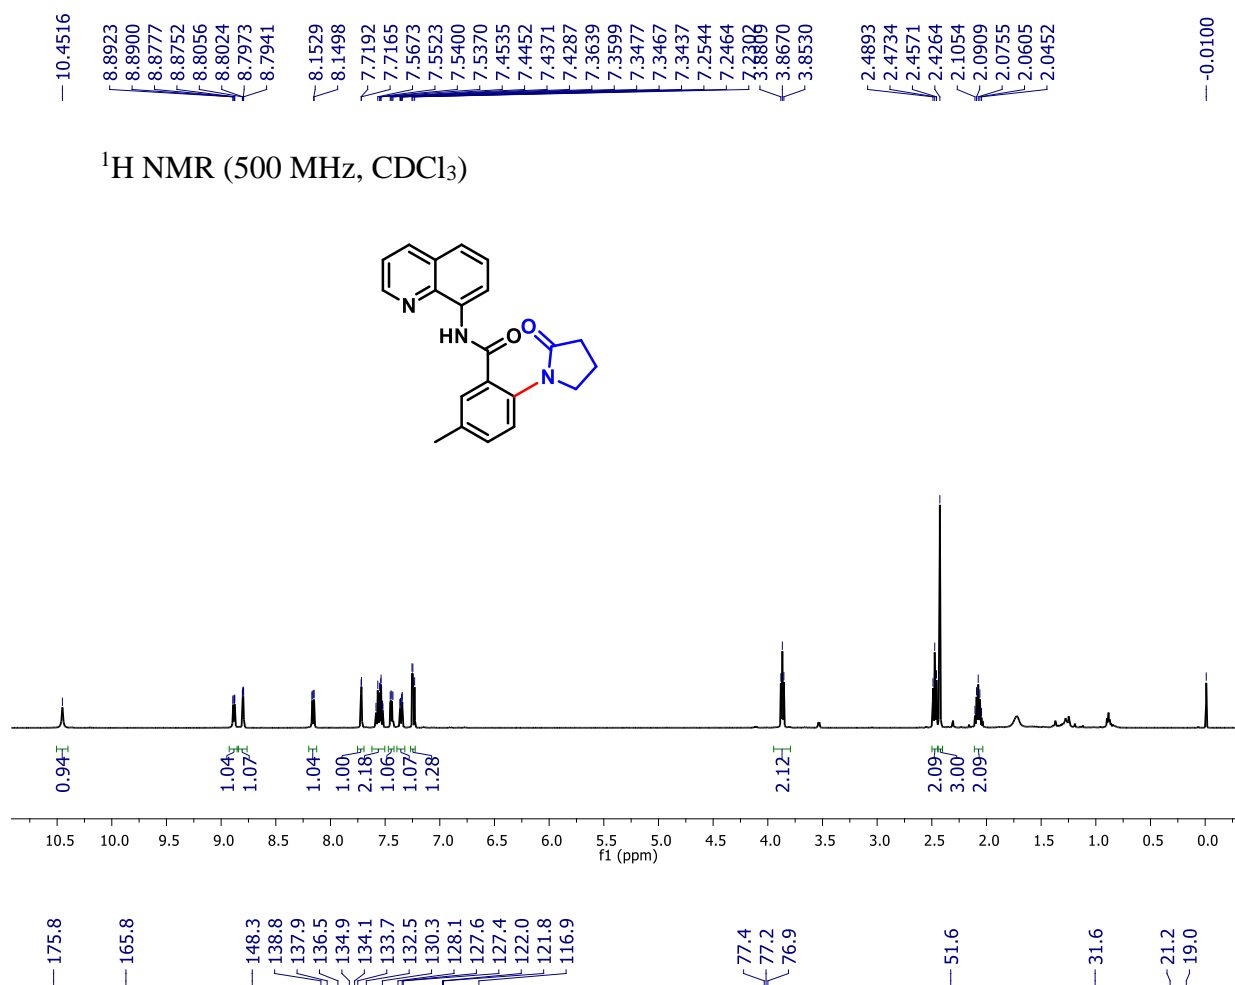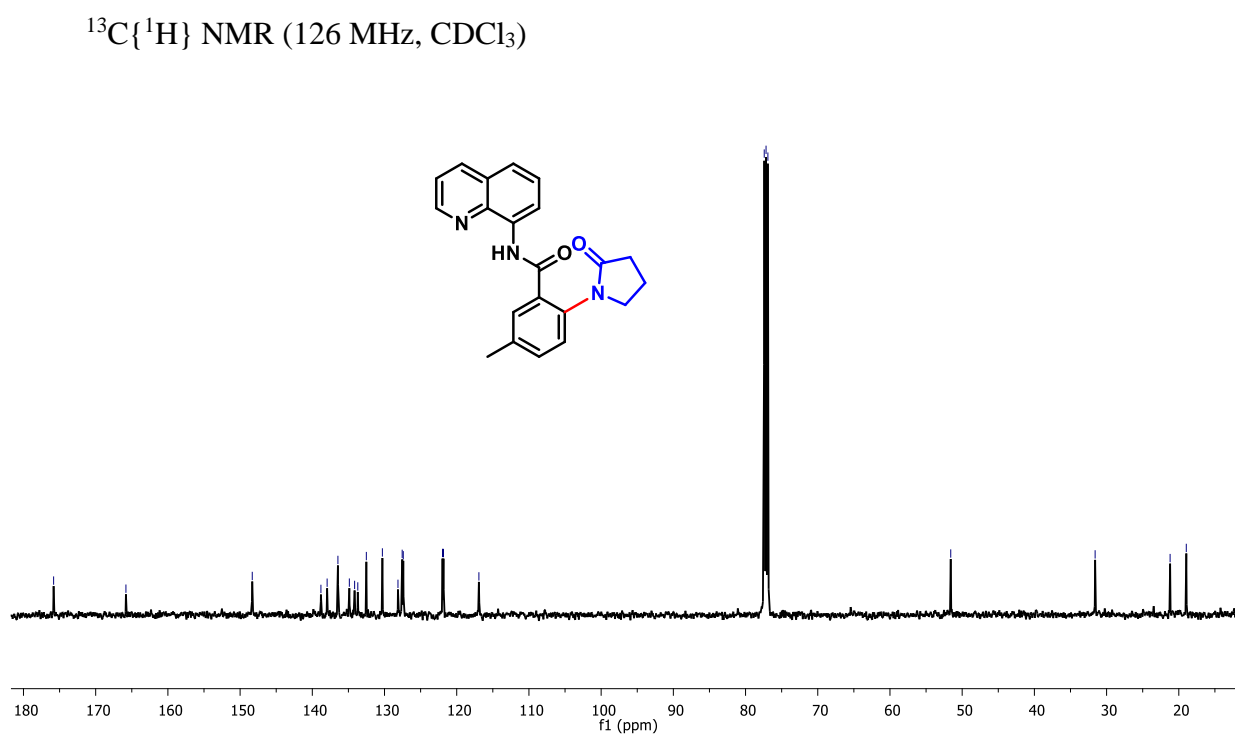

**2-fluoro-6-(2-oxopyrrodin-1-yl)-N-(quinoline-8-yl)benzamide (3f):**

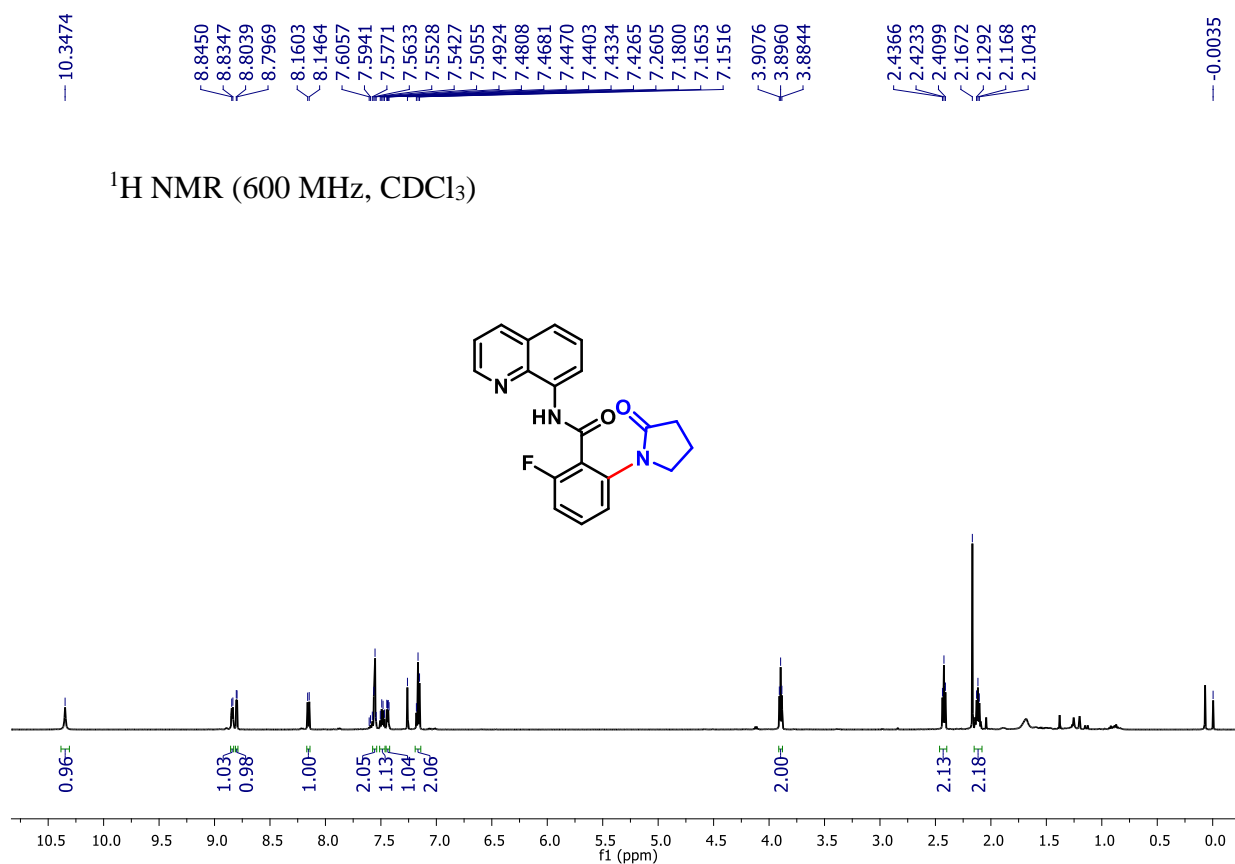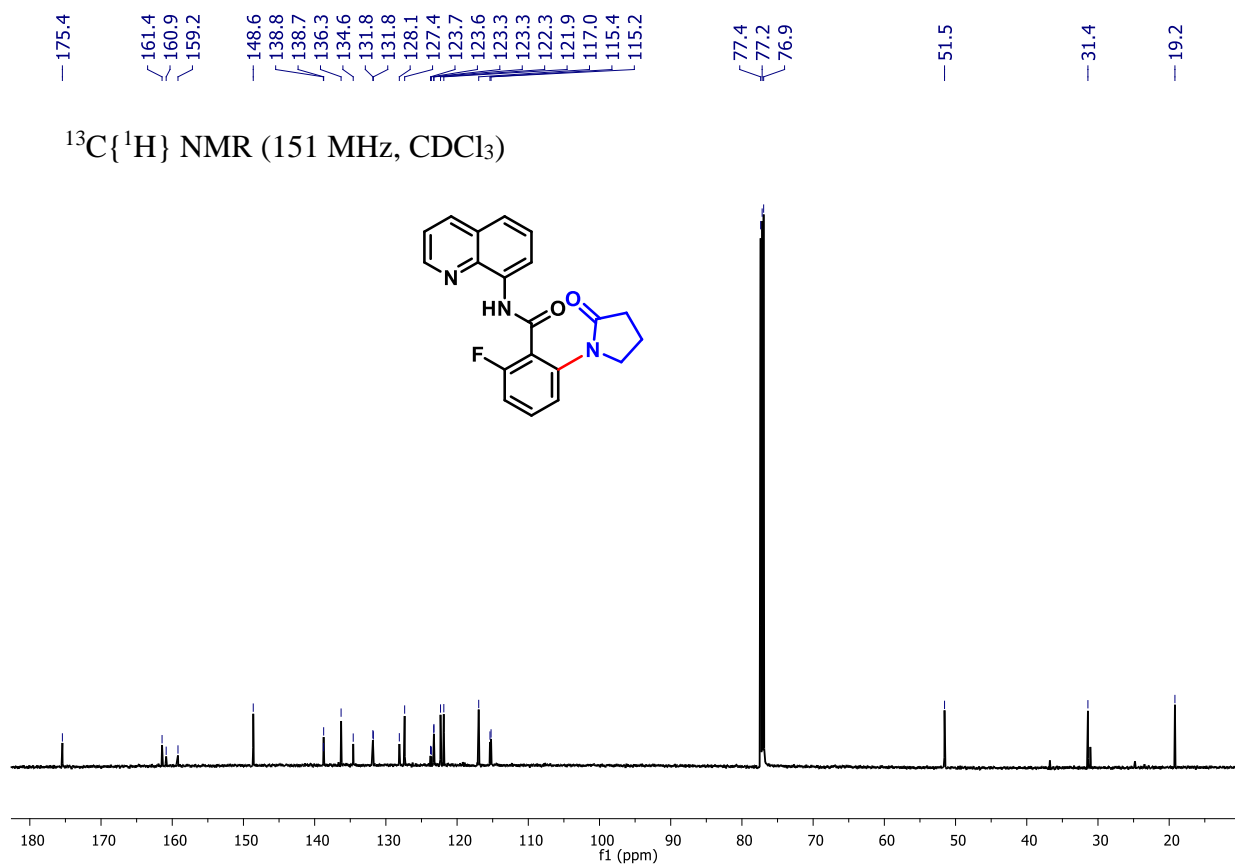

$^{19}\text{F}$  NMR (565 MHz,  $\text{CDCl}_3$ )

-118.70  
-118.72  
-118.73

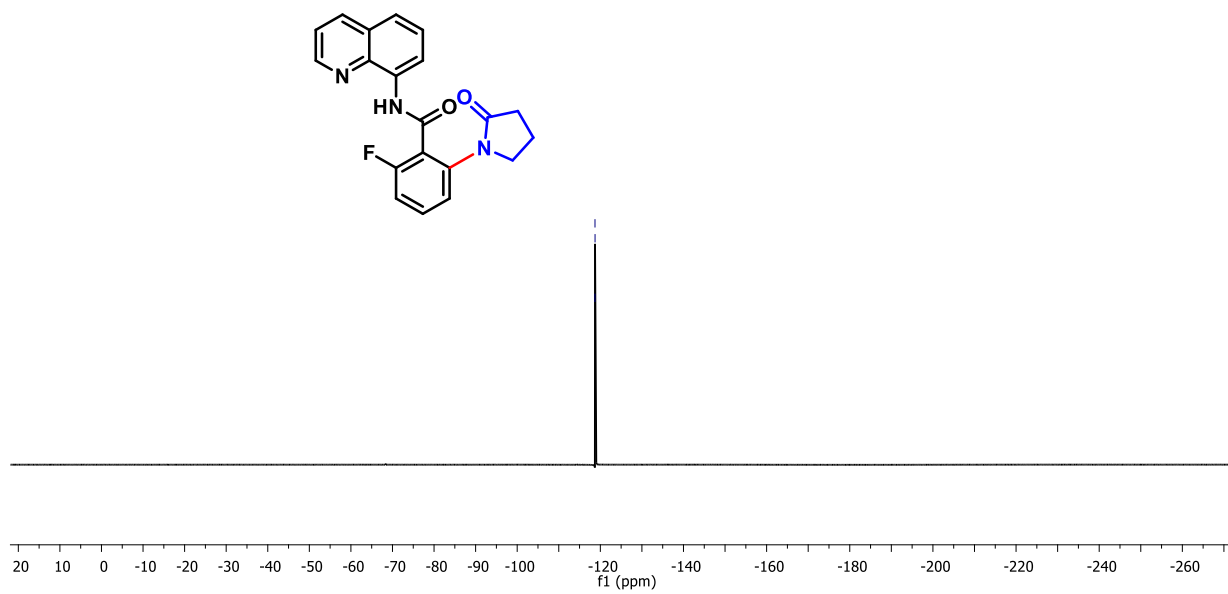

**N-(2-methylquinoline-8-yl)-2-(2-oxopyrrodin-1-yl)benzamide (3g):**

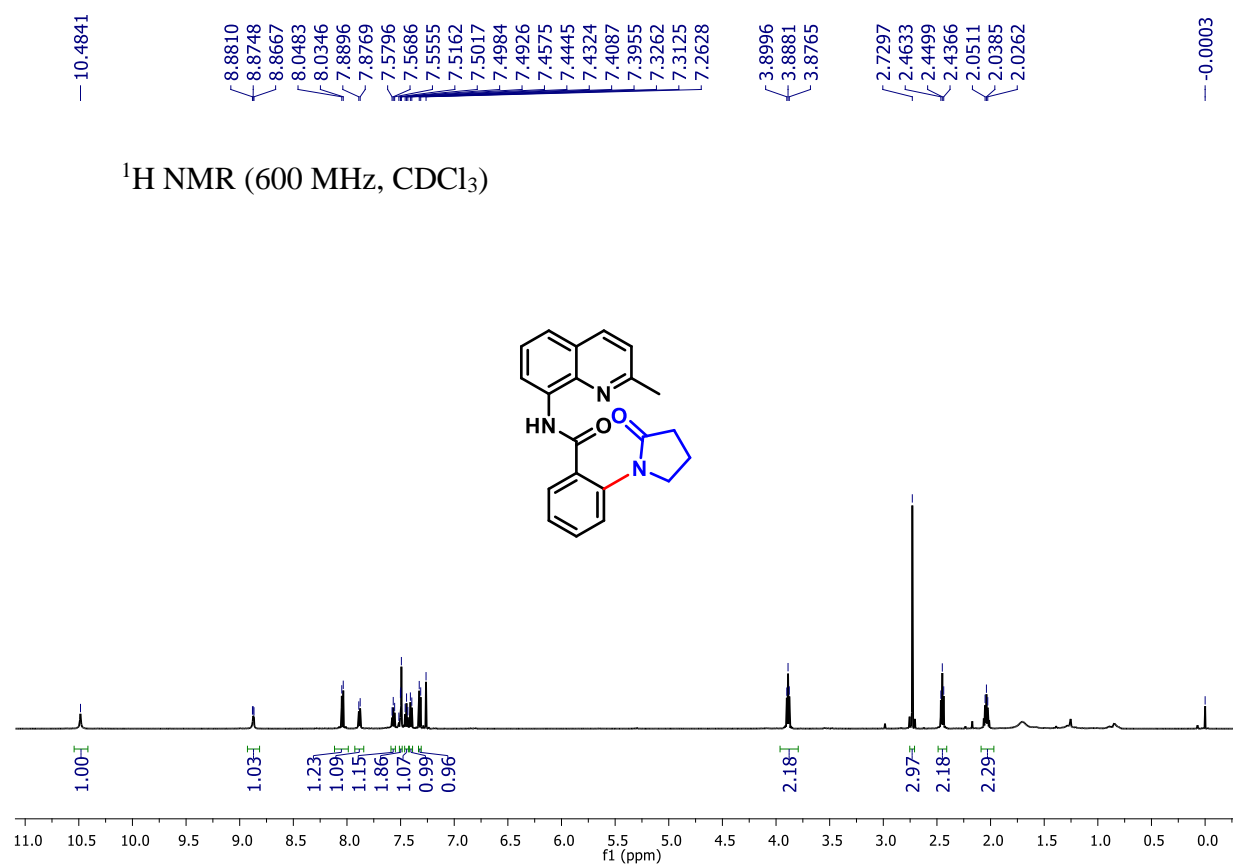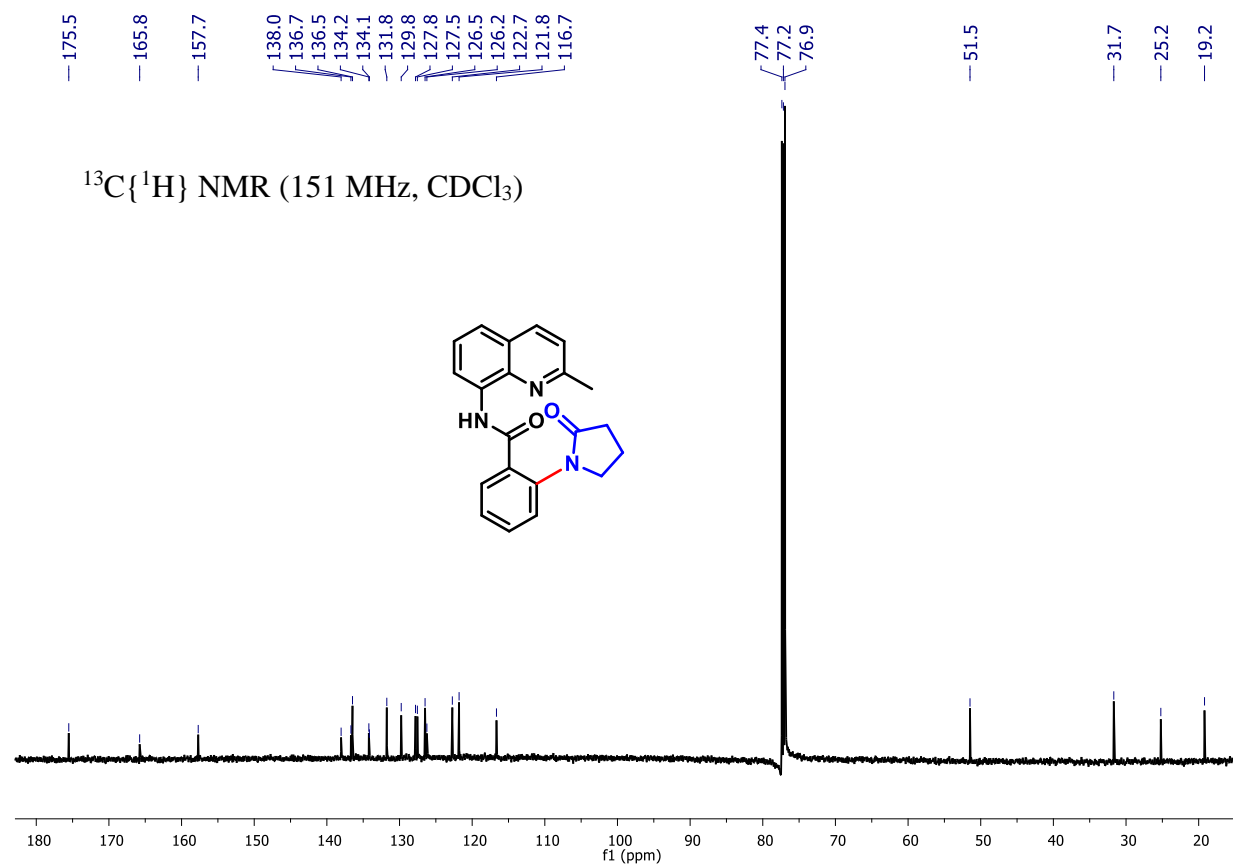



**N-(5-chloroquinoline-8-yl)-2-(2-oxopyrrodin-1-yl)benzamide (3h):**

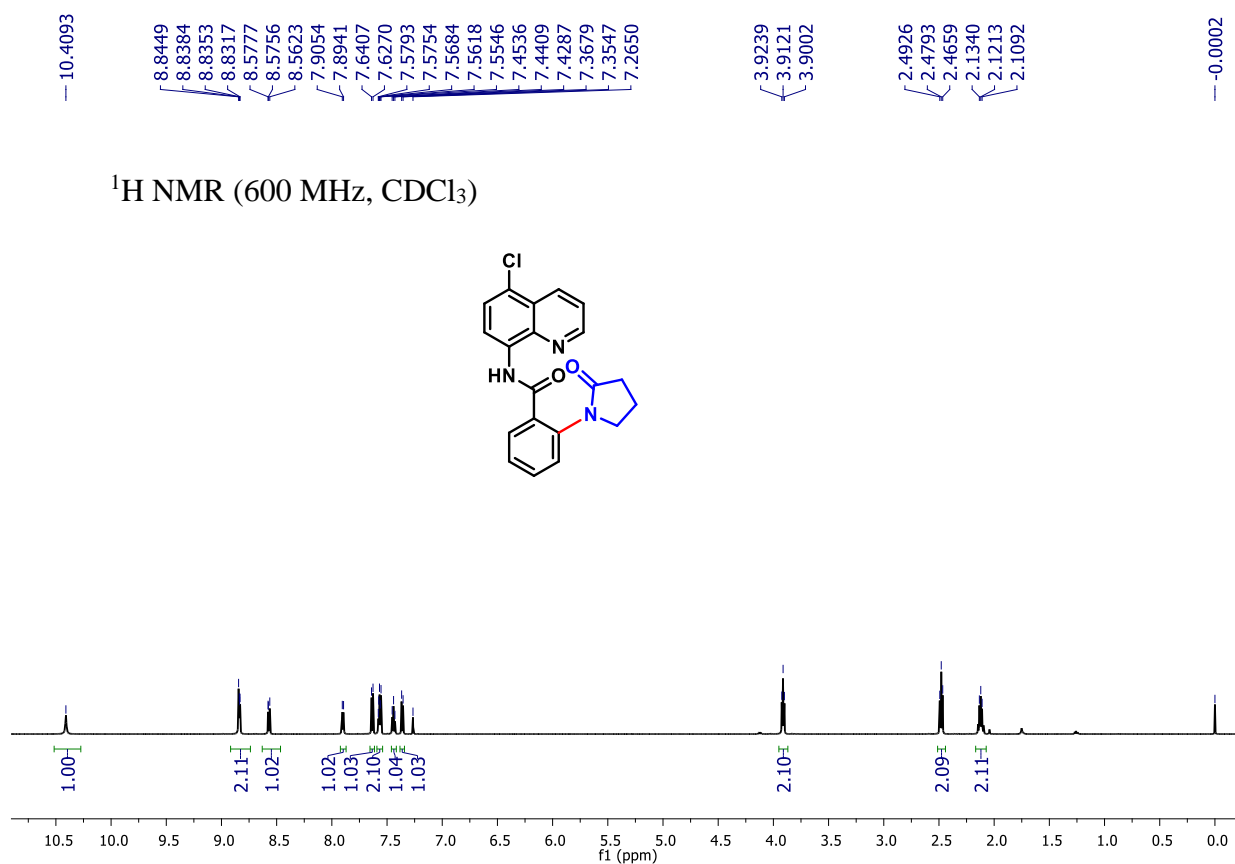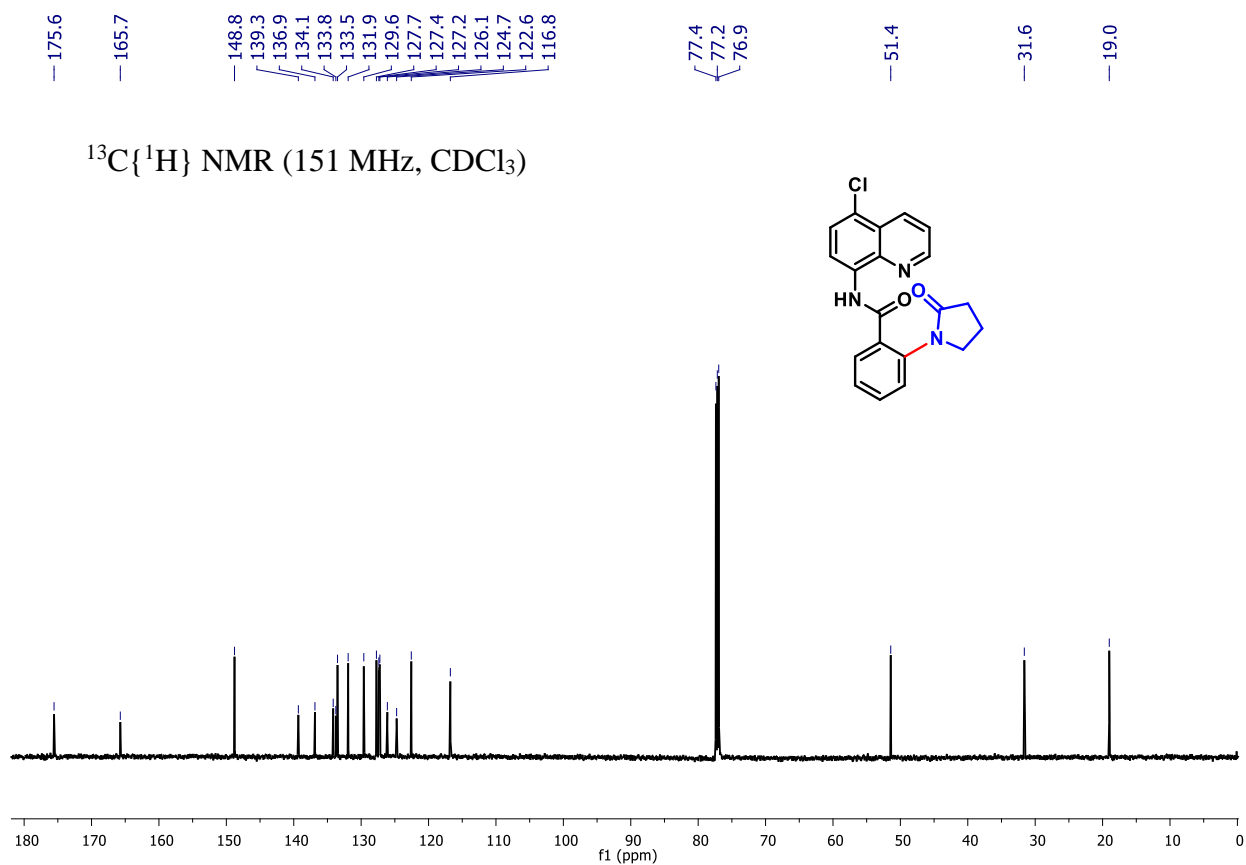

**N-(6-methoxyquinolin-8-yl)-2-(2-oxopyrrolidin-1-yl)benzamide (3i):**

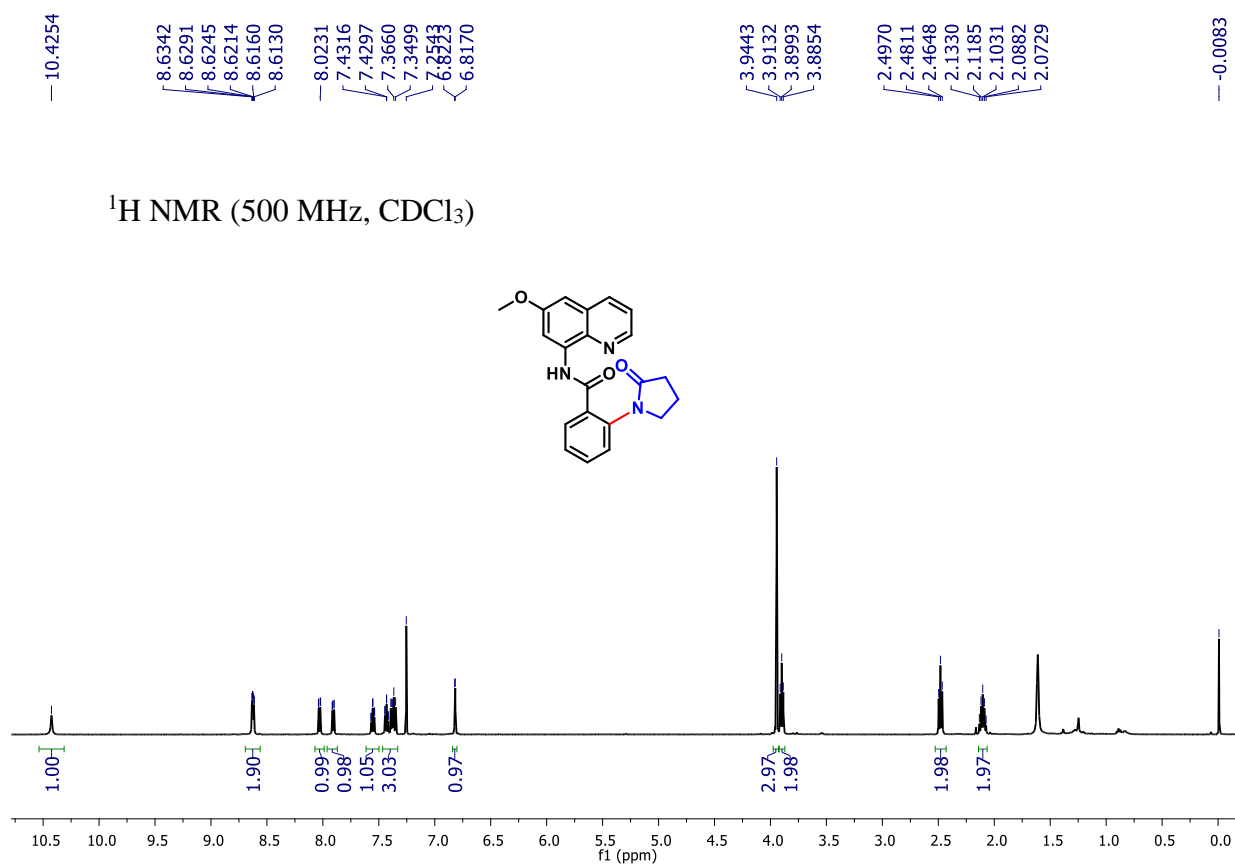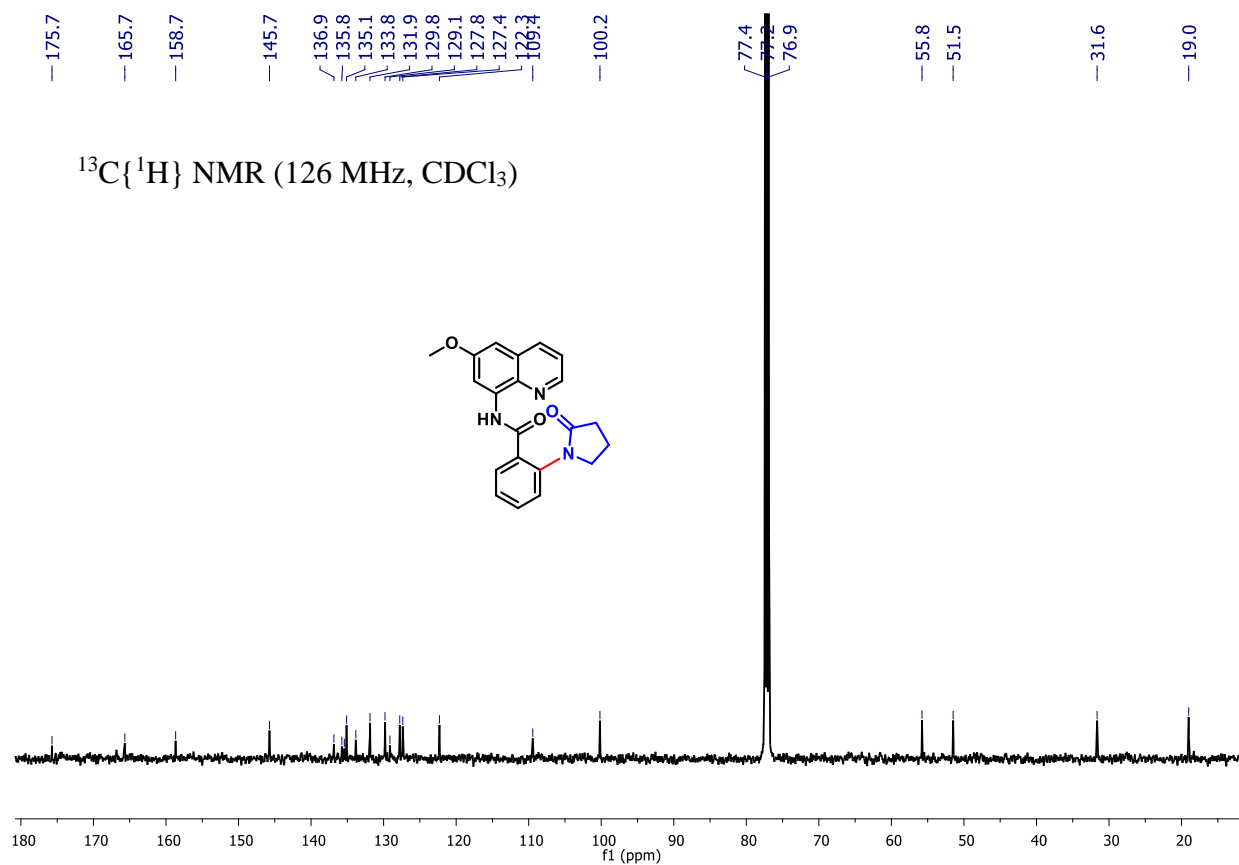

**2-fluoro-6-(2-oxopyrrodin-1-yl)-N-(quinoline-8-yl)benzamide (3j):**

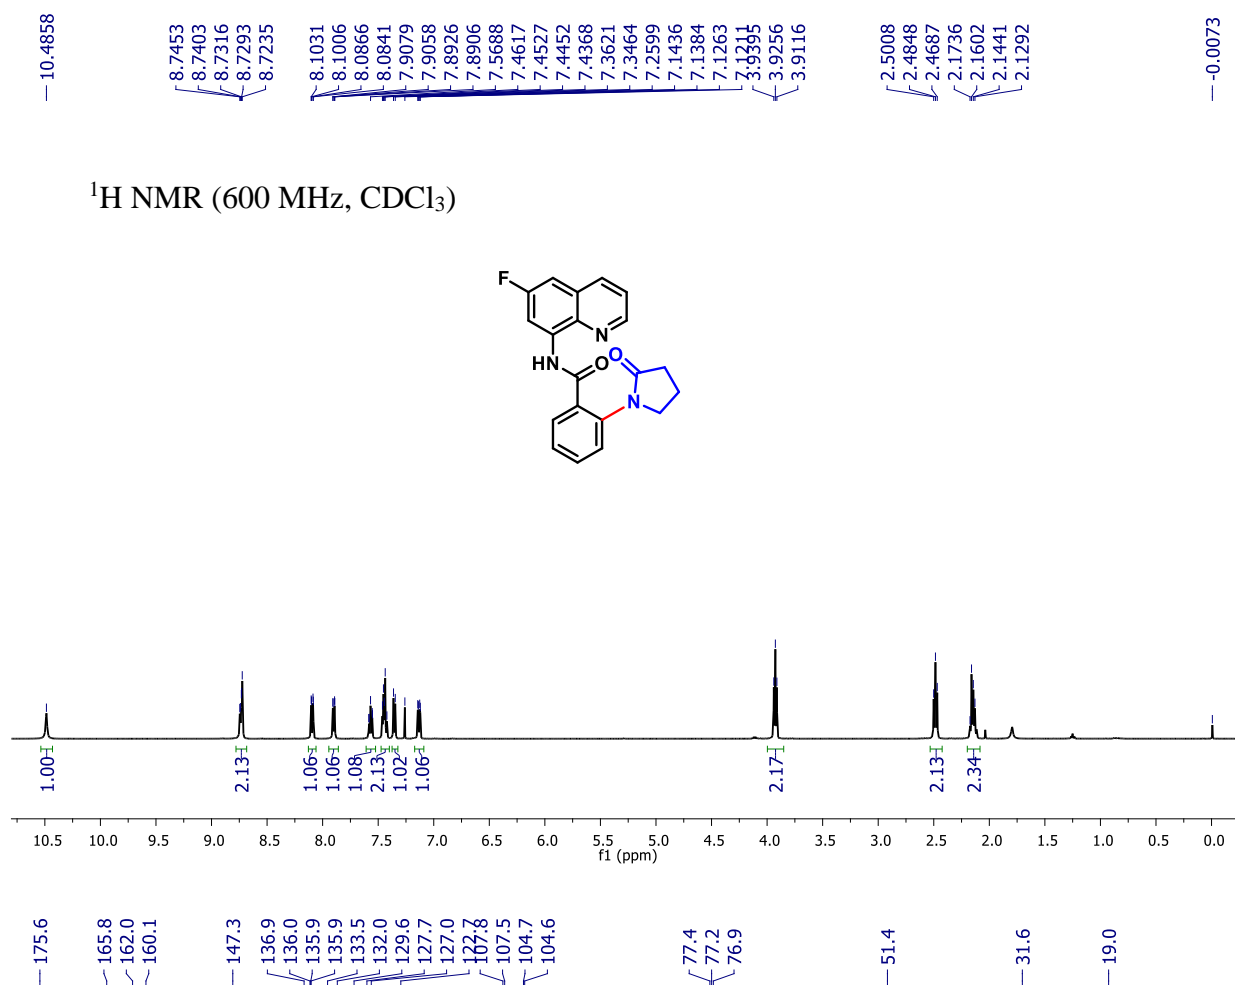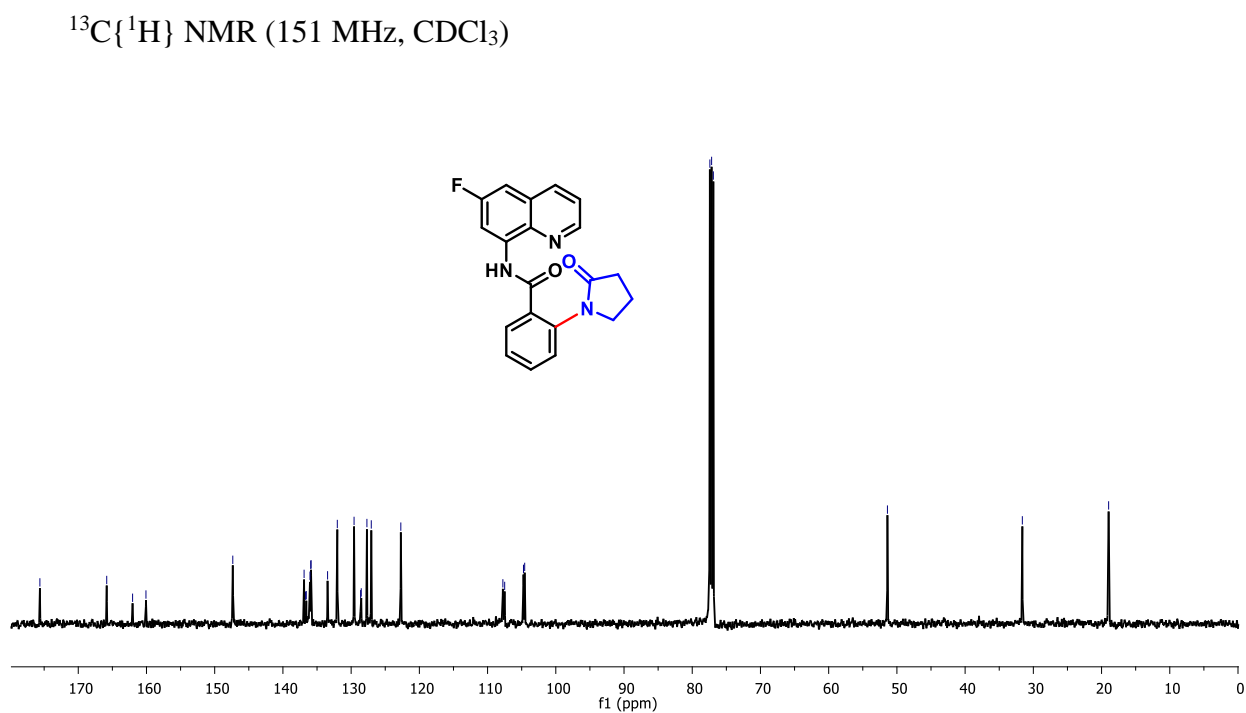

$^{19}\text{F}$  NMR (565 MHz,  $\text{CDCl}_3$ )

-114.79  
-114.81  
-114.82

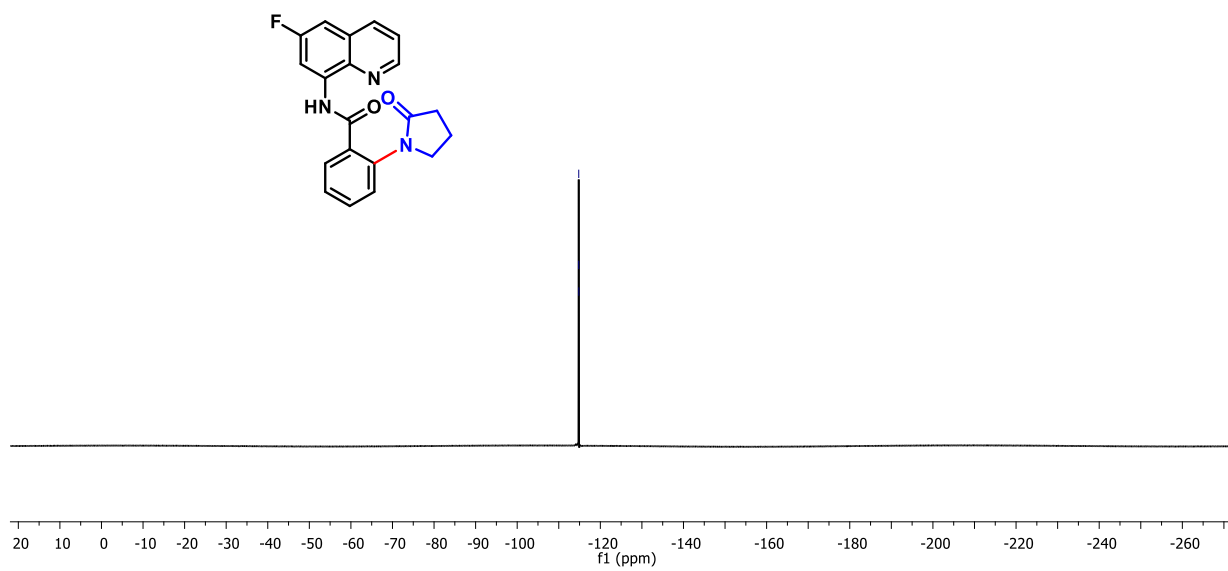

**2-(2-oxopyrrodin-1-yl)-N-(quinoline-8-yl)-1naphthamide (3k):**

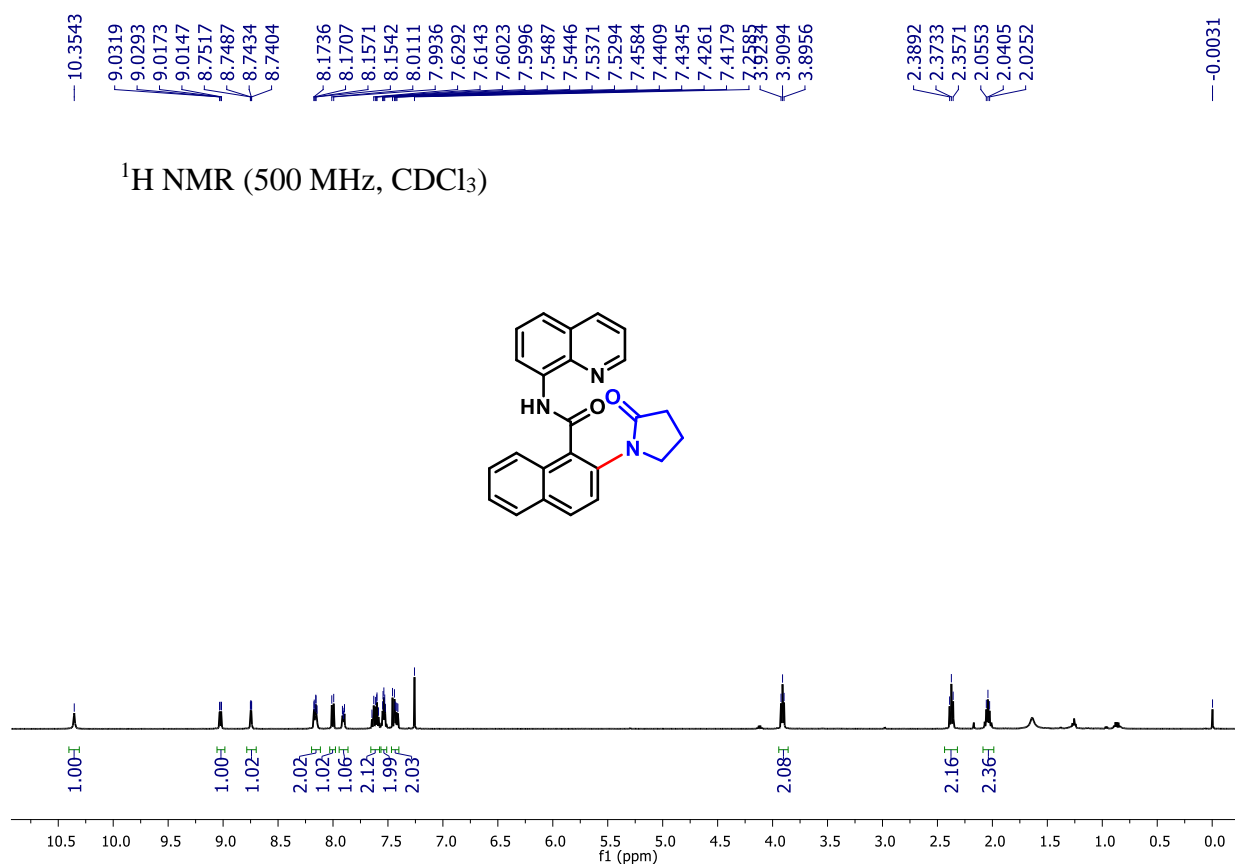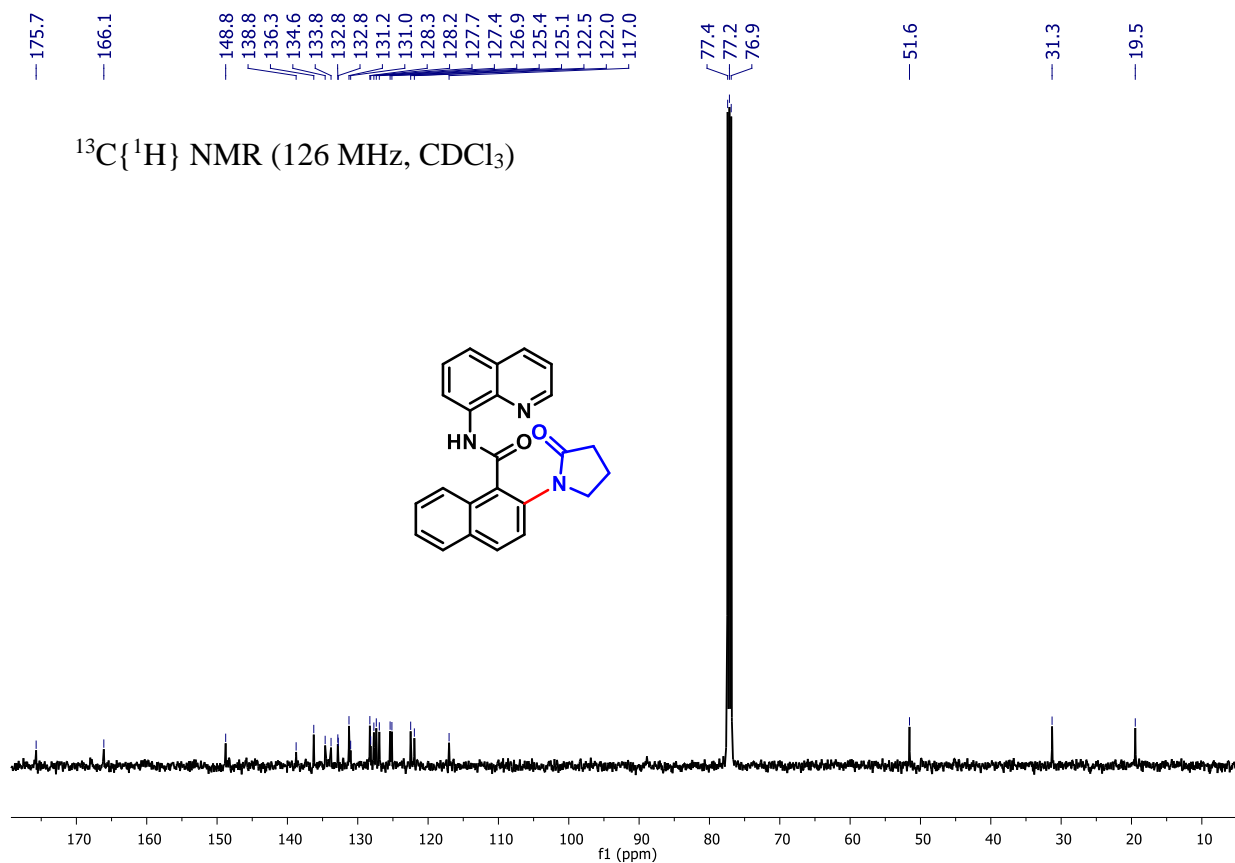

**2-(2-oxopiperidin-1-yl)-N-(quinoline-8-yl)benzamide (3l):**

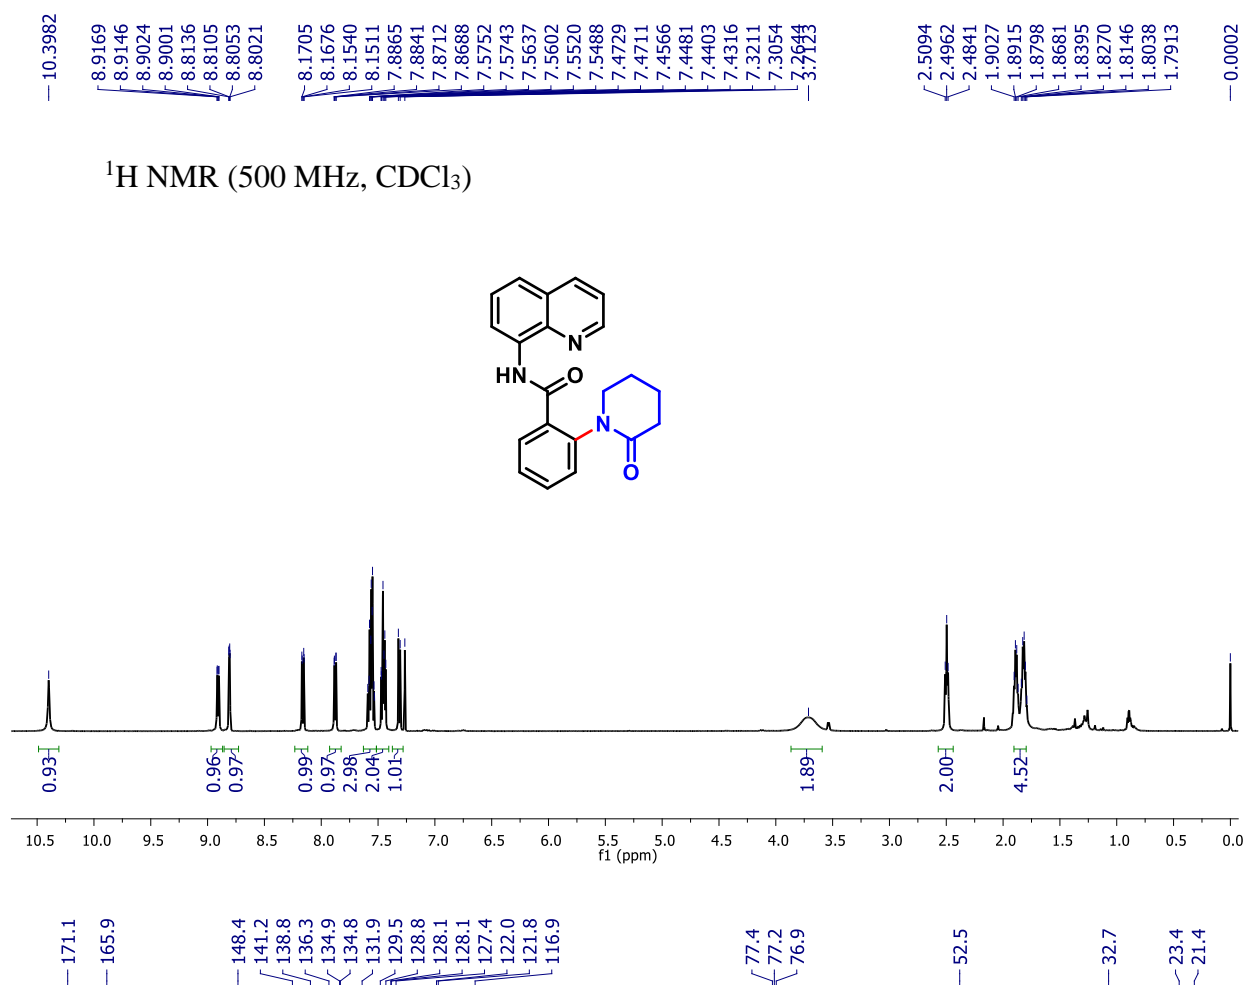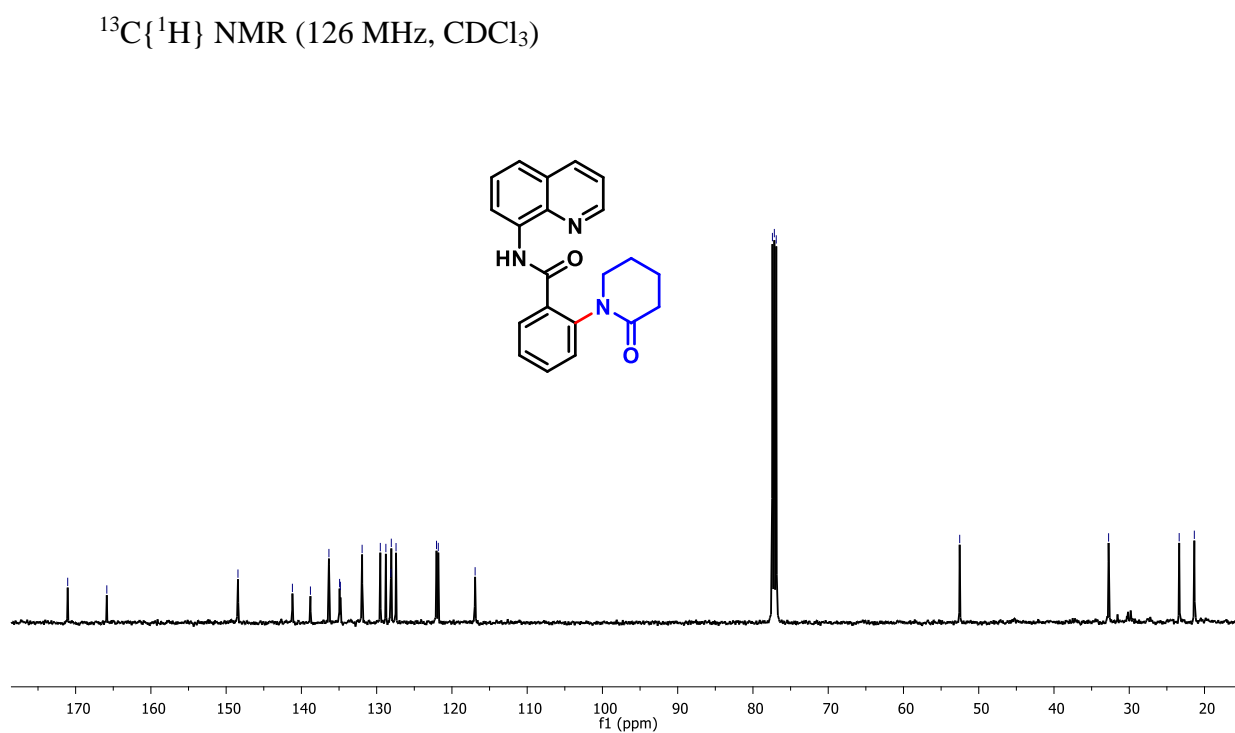

**2-(2-oxopiperidin-1-yl)-N-(quinoline-8-yl)-4-(trifluoromethyl)benzamide (3m):**

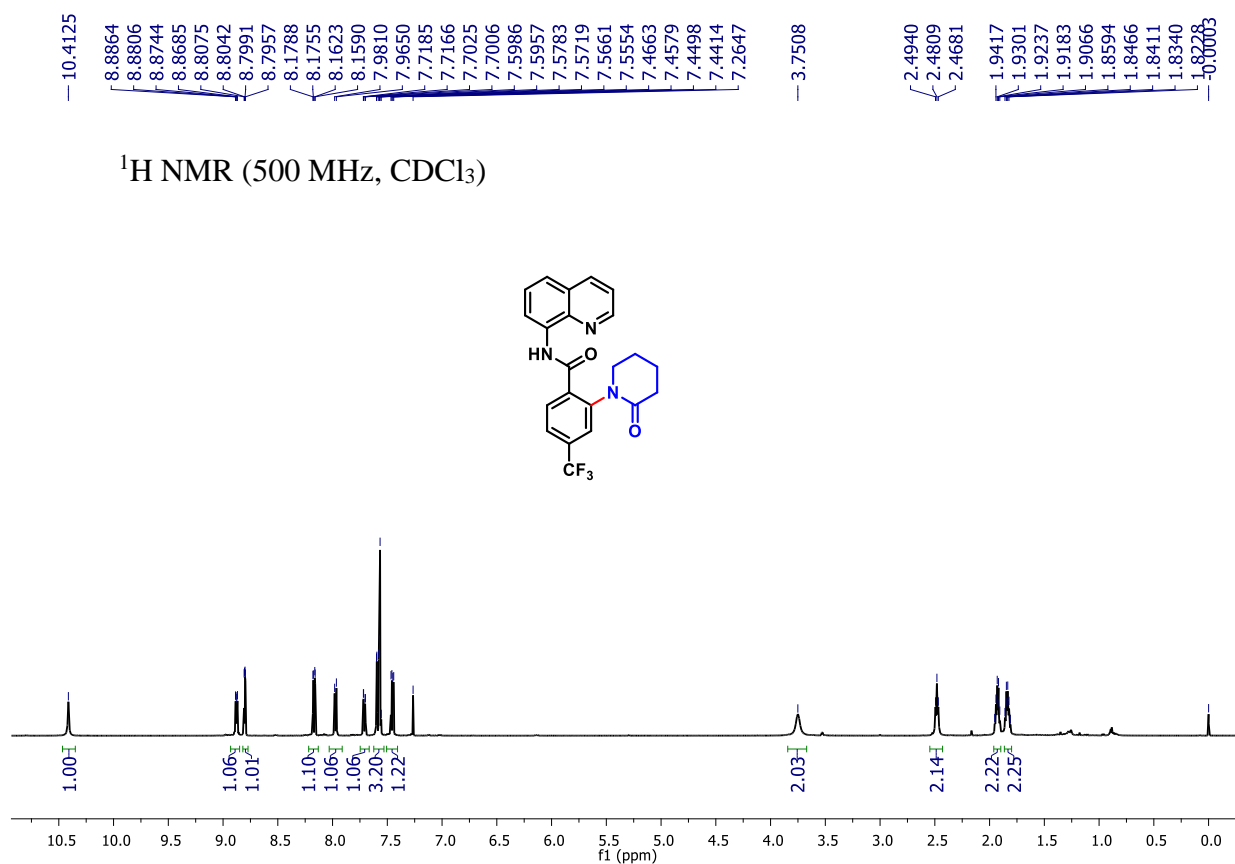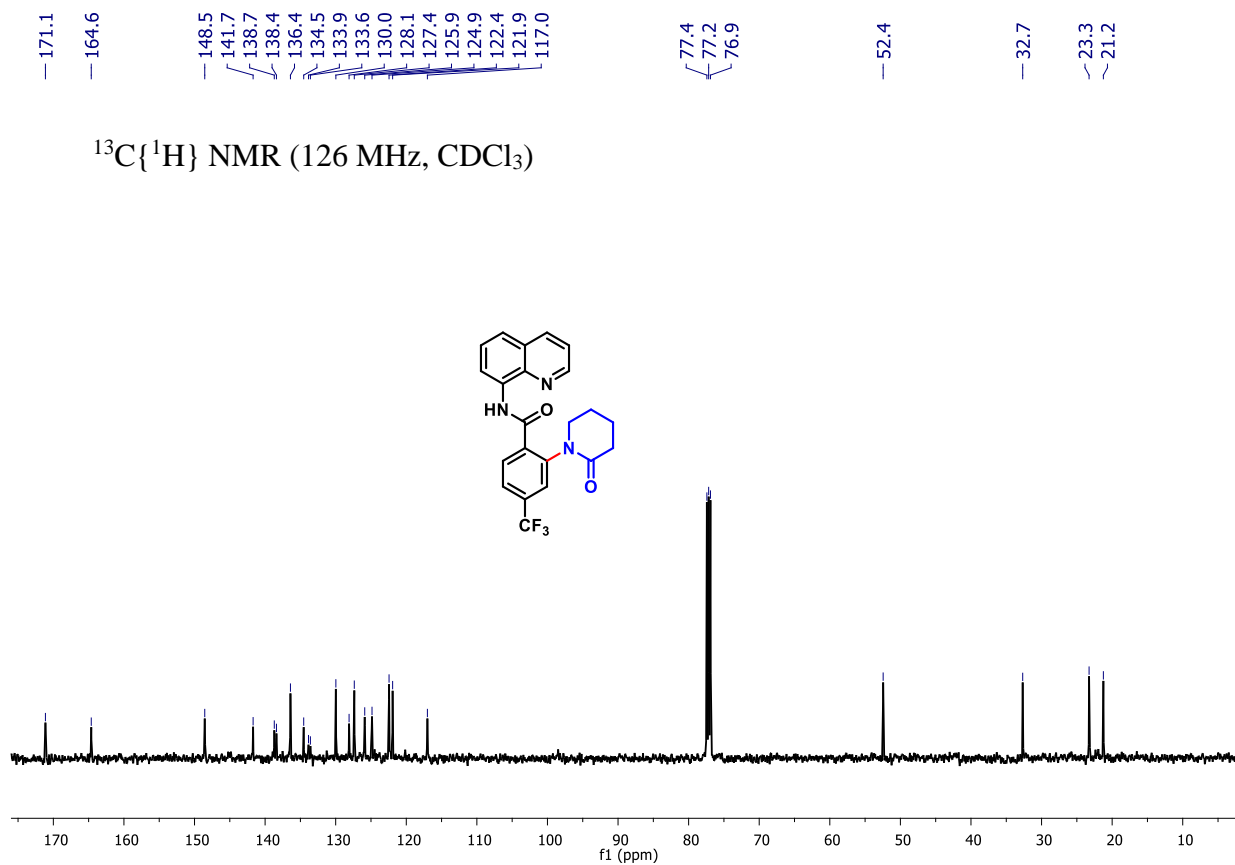

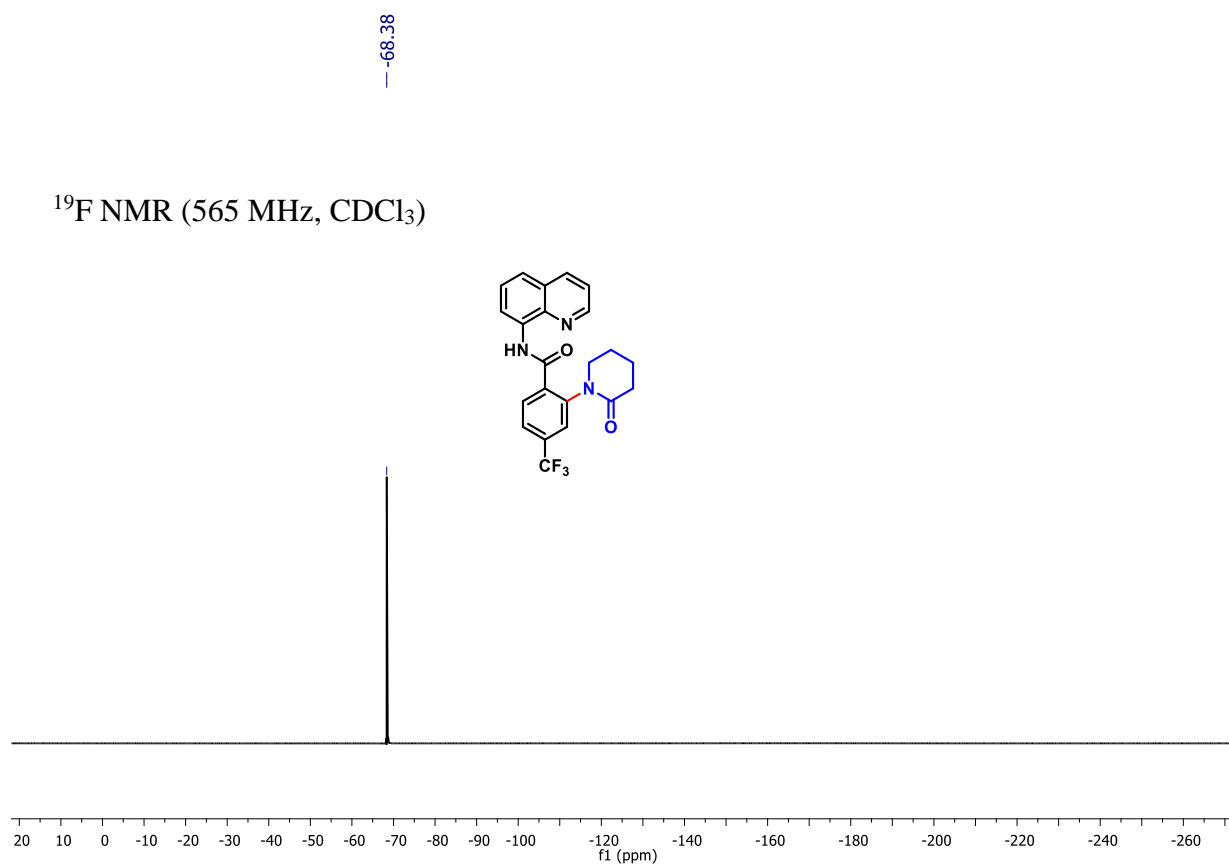



**2-(2-oxazepan-1-yl)-N-(quinoline-8-yl)benzamide (3n):**

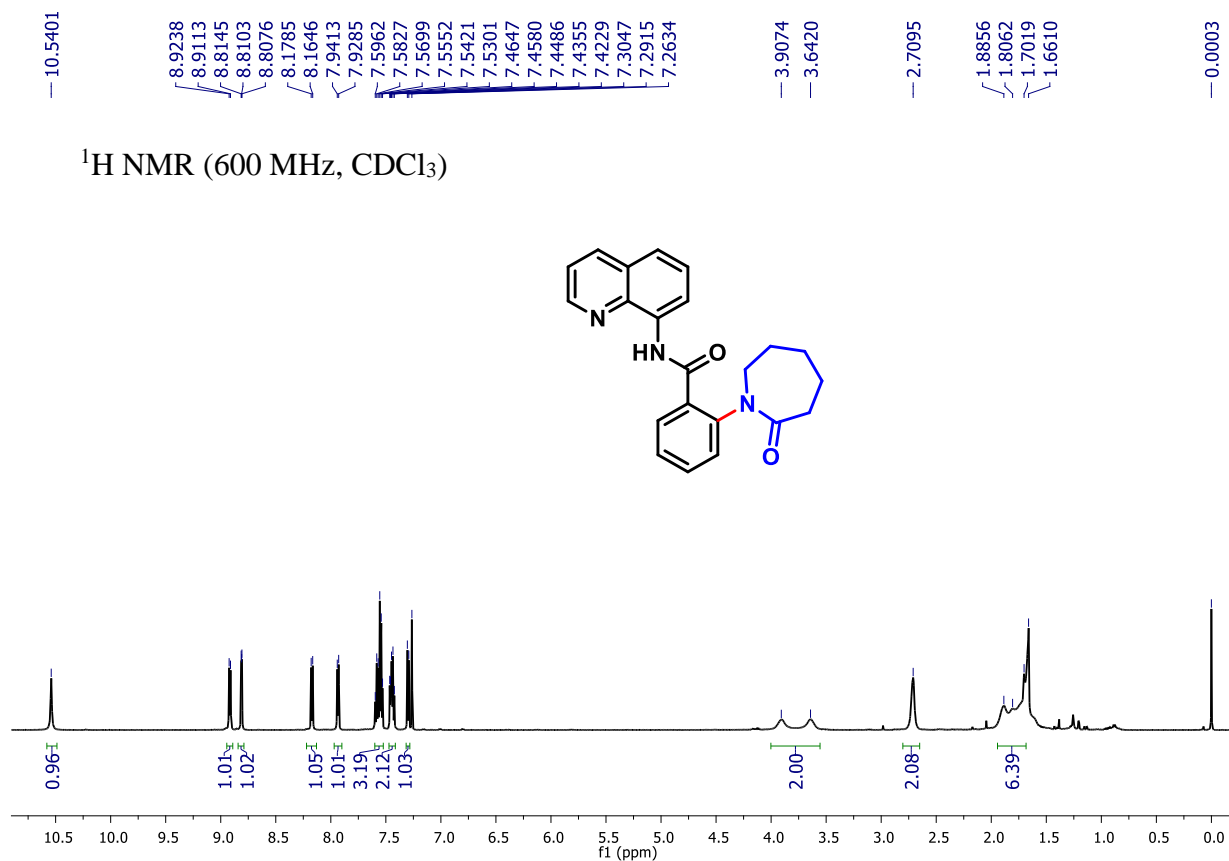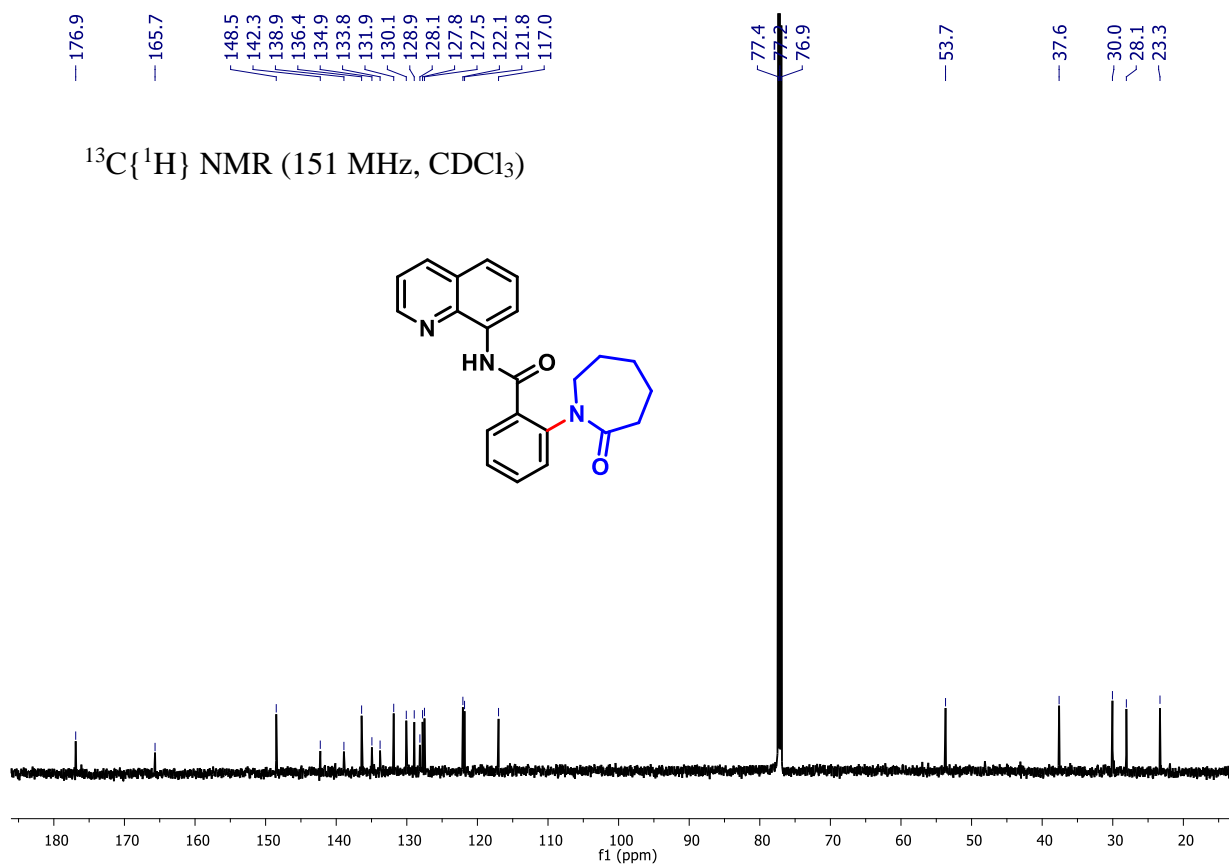

**4-methoxy-2-(2-oxoazepan-1-yl)-N-(quinoline-8-yl)benzamide (3o):**

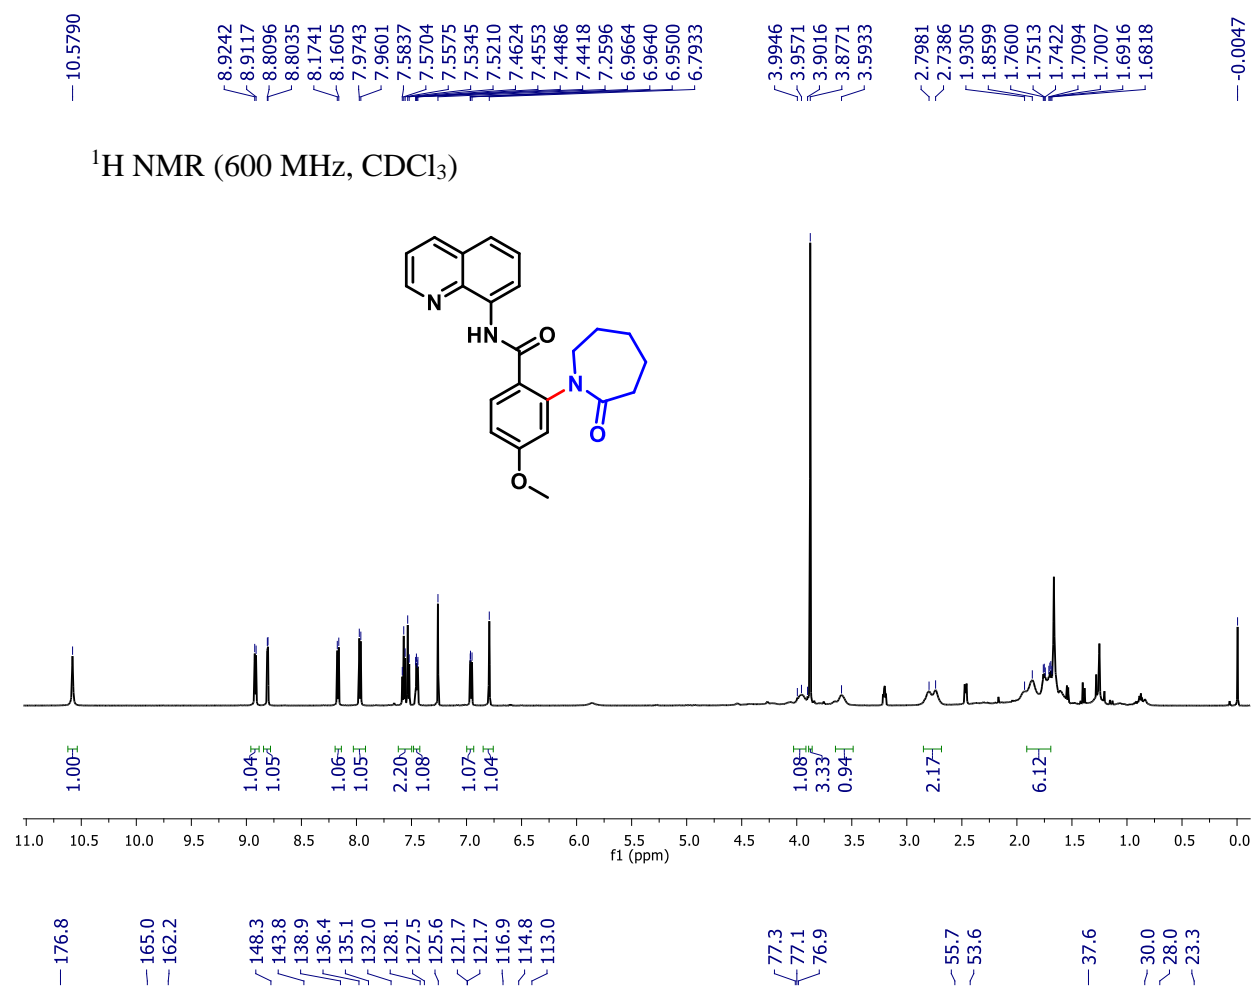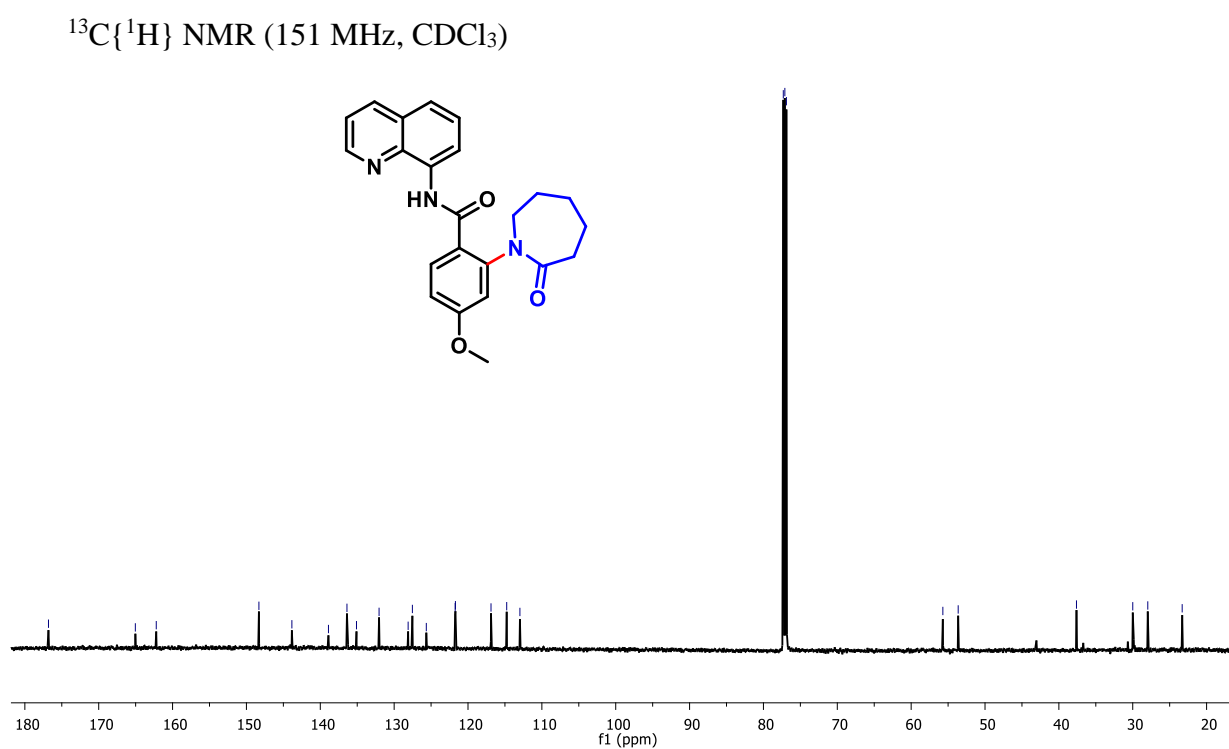

**2-(2-oxoazepan-1-yl)-N-(quinoline-8-yl)-1-naphthamide (3p):**

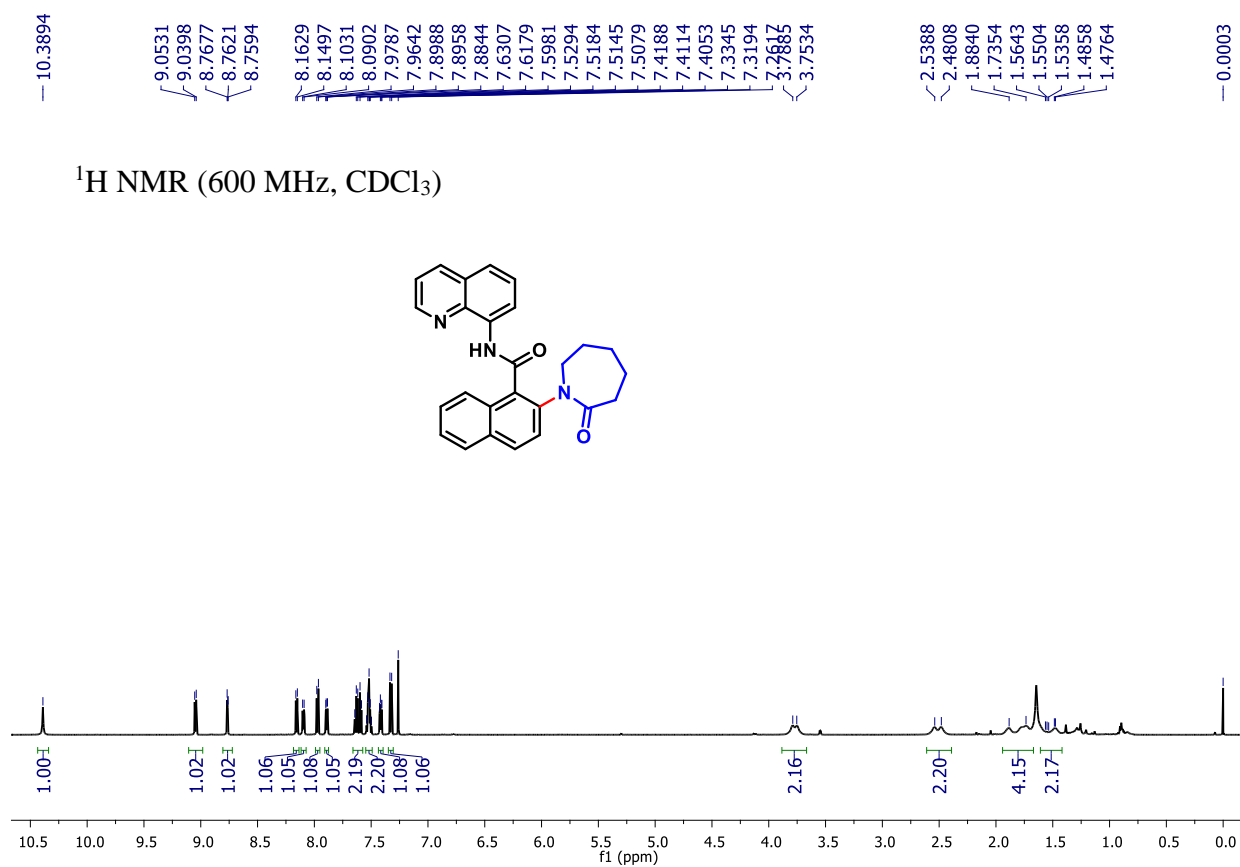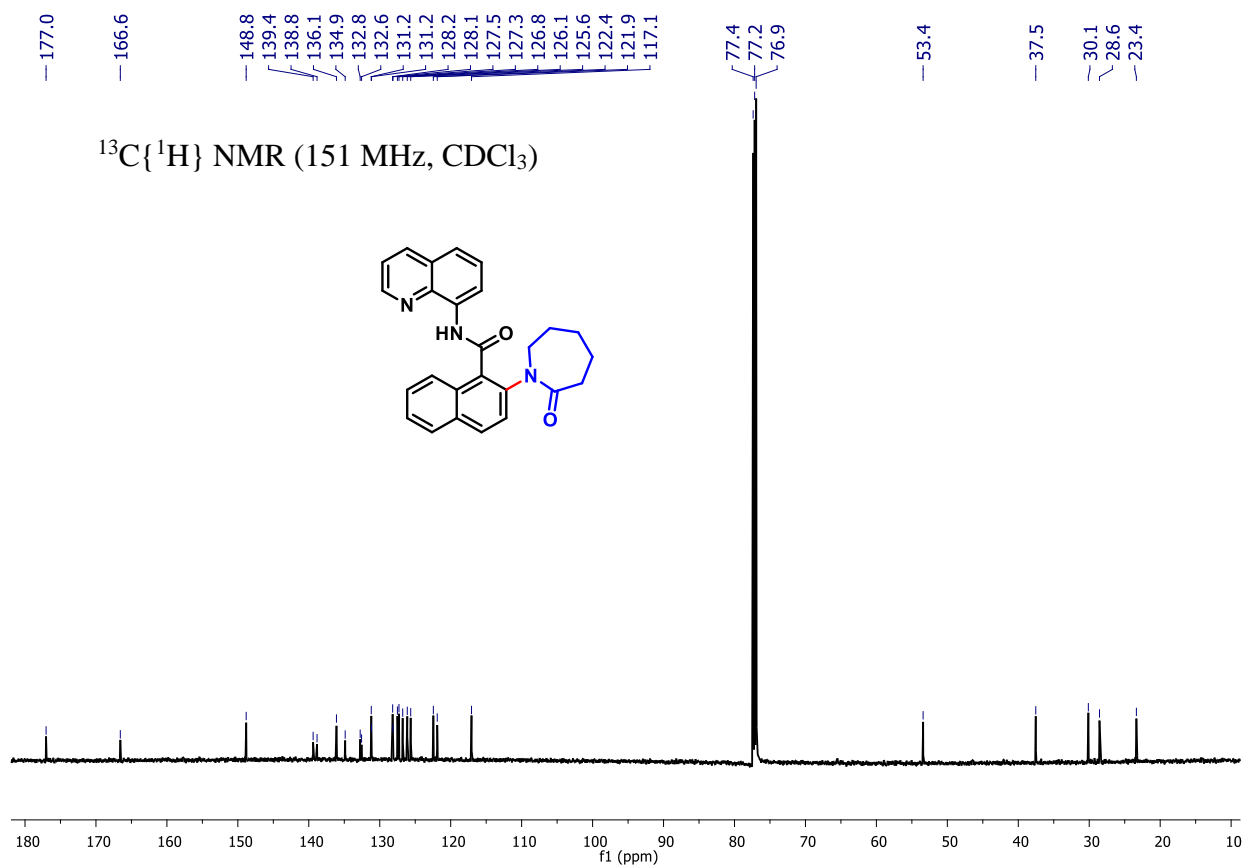

**3-(2-oxopyrrodin-1-yl)-N-(quinoline-8-yl)thiophene-2-carboxamide (3q):**

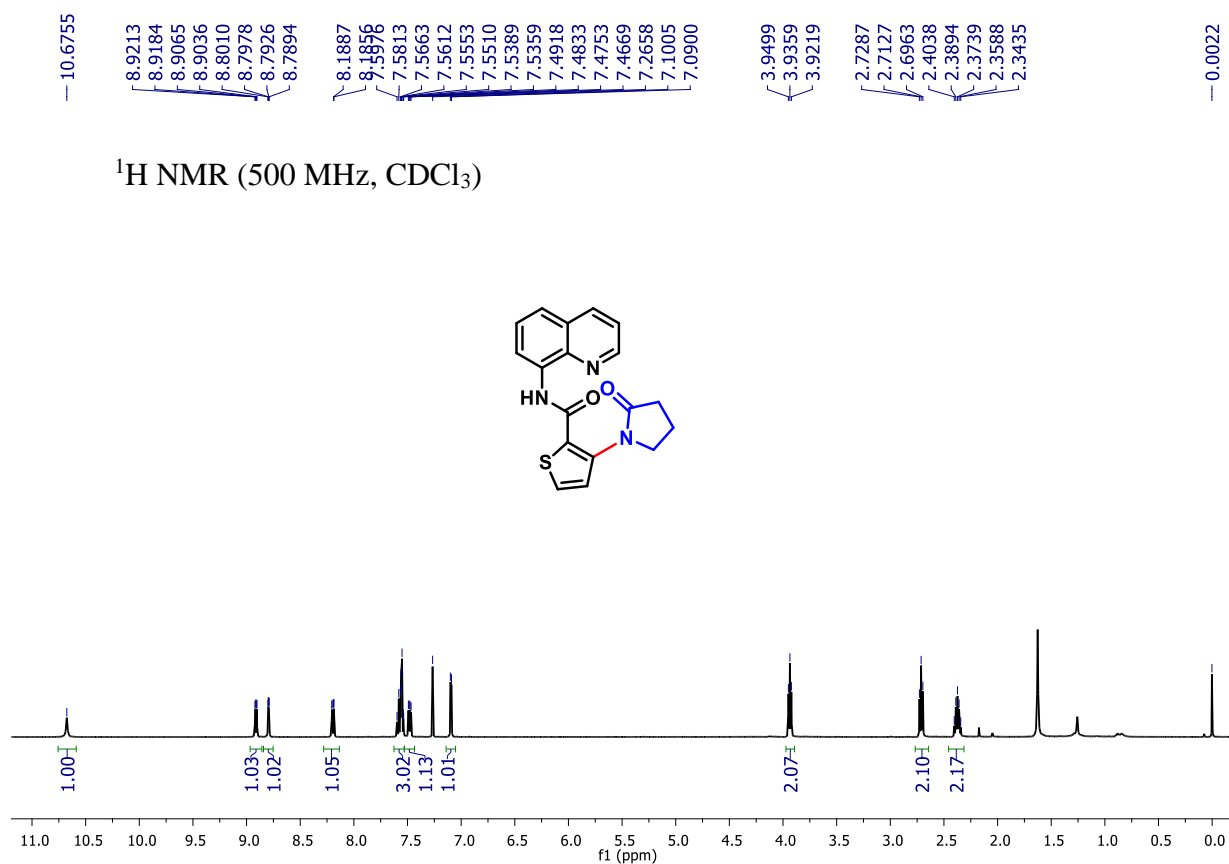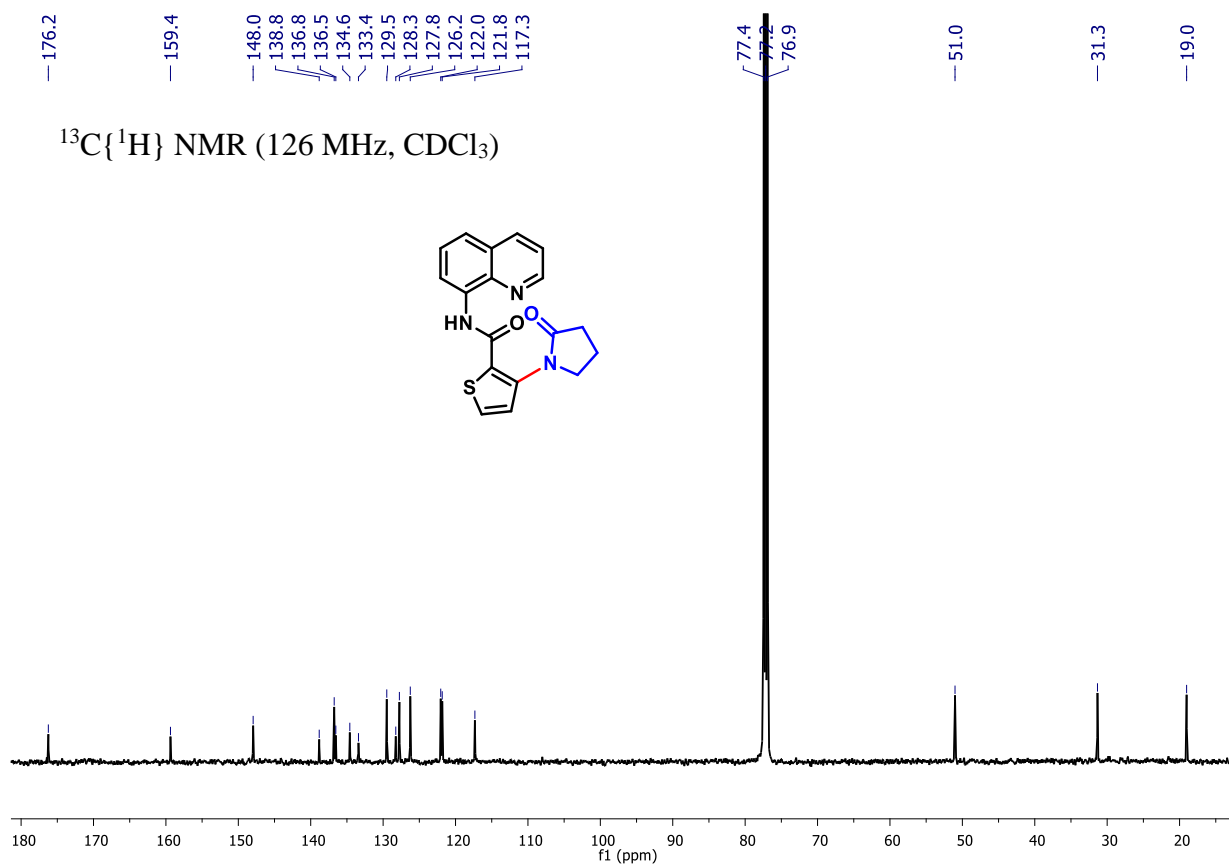

**3-(2-oxopiperidin-1-yl)-N-(quinoline-8-yl)thiophene-2-carboxamide (3r):**

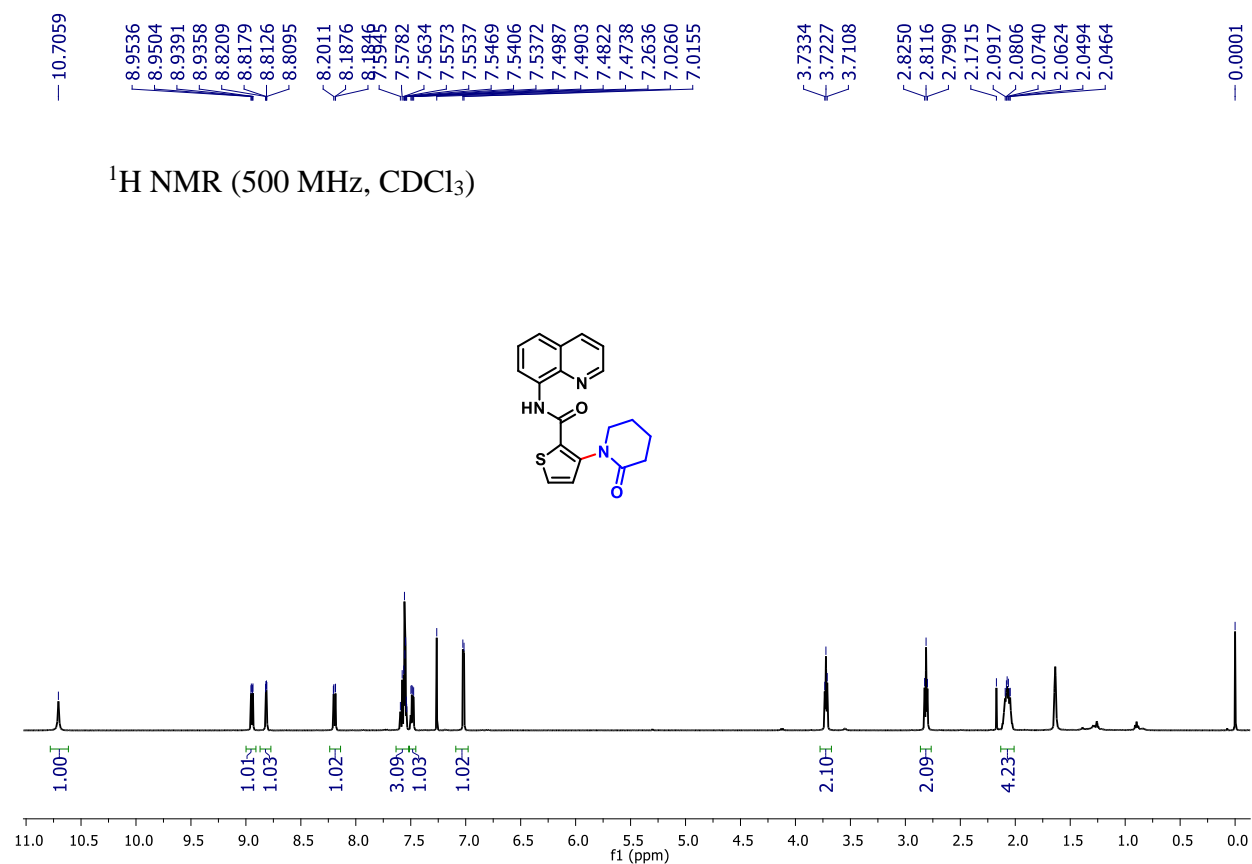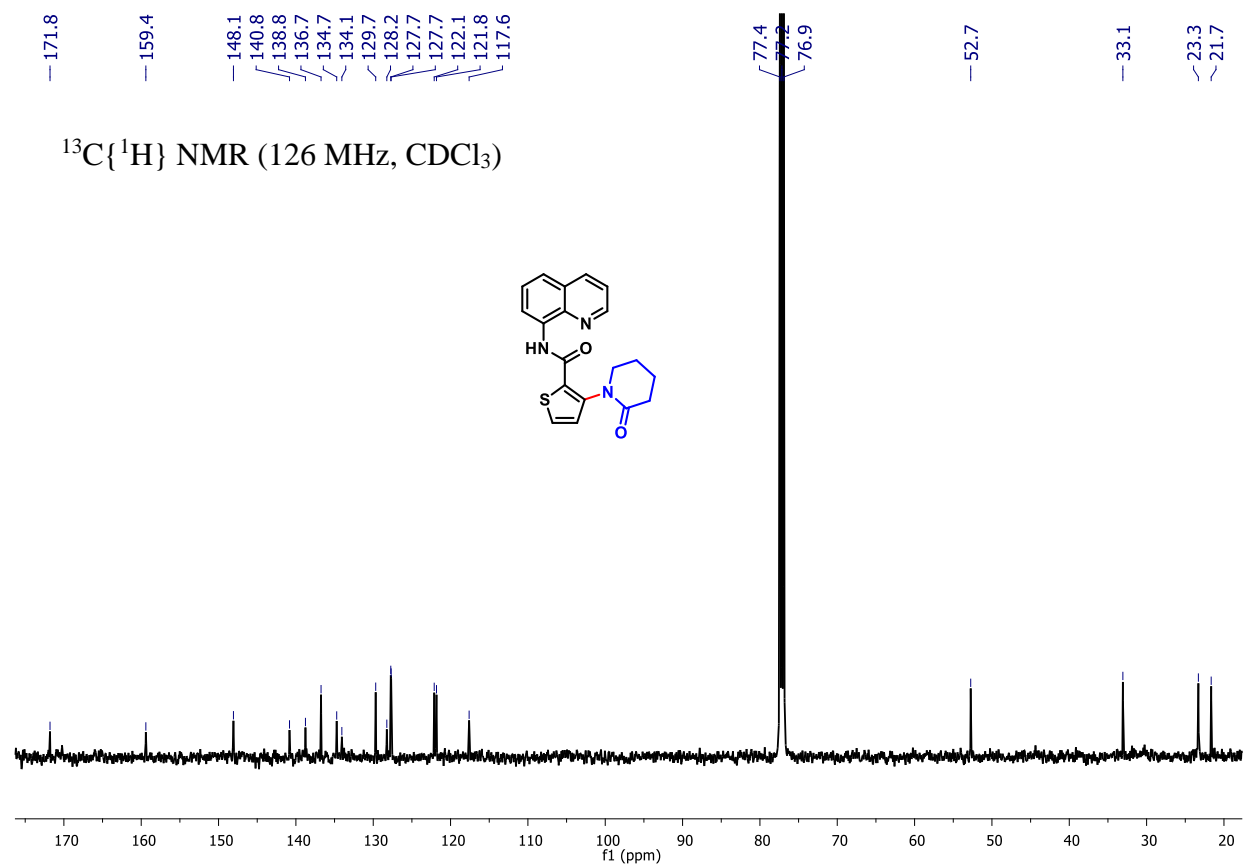

**3-(2-oxoazepan-1-yl)-N-(quinoline-8-yl)thiophene-2-carboxamide (3s):**

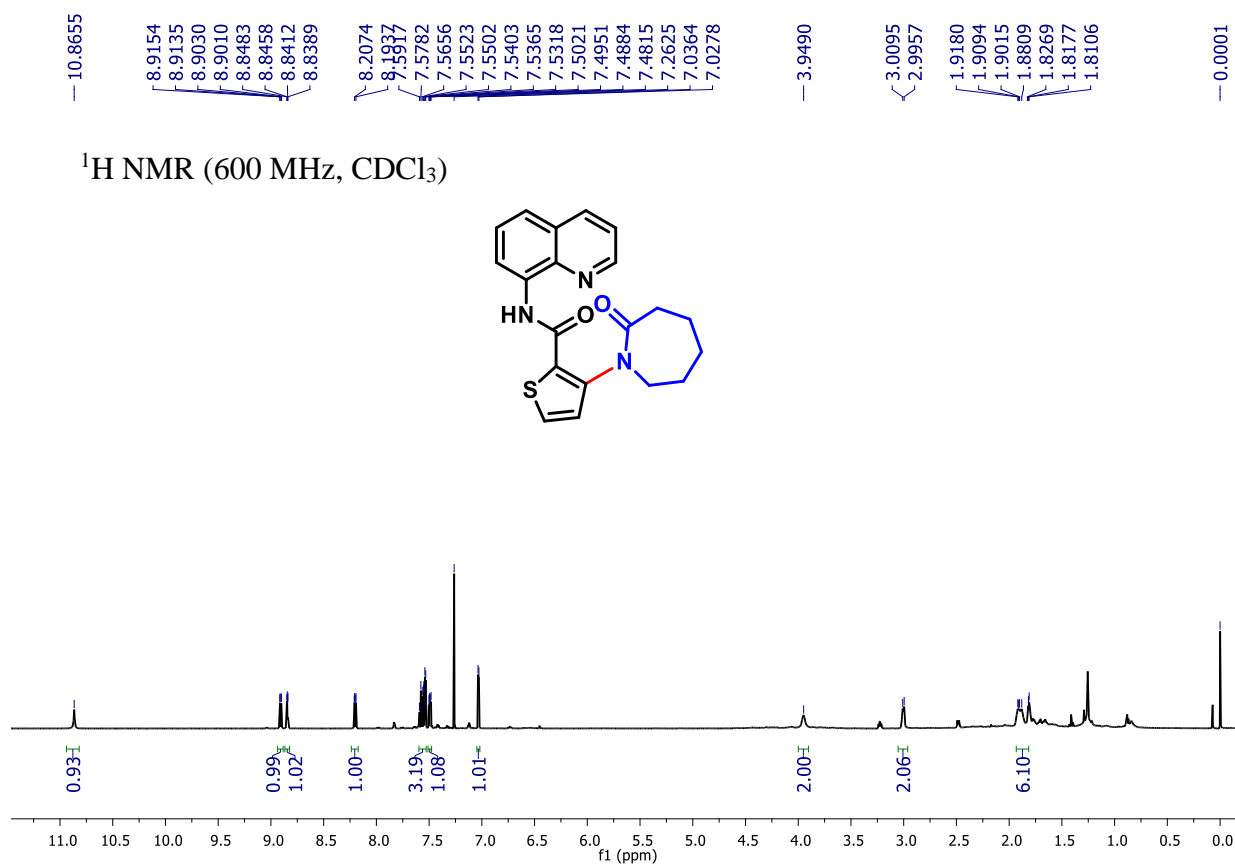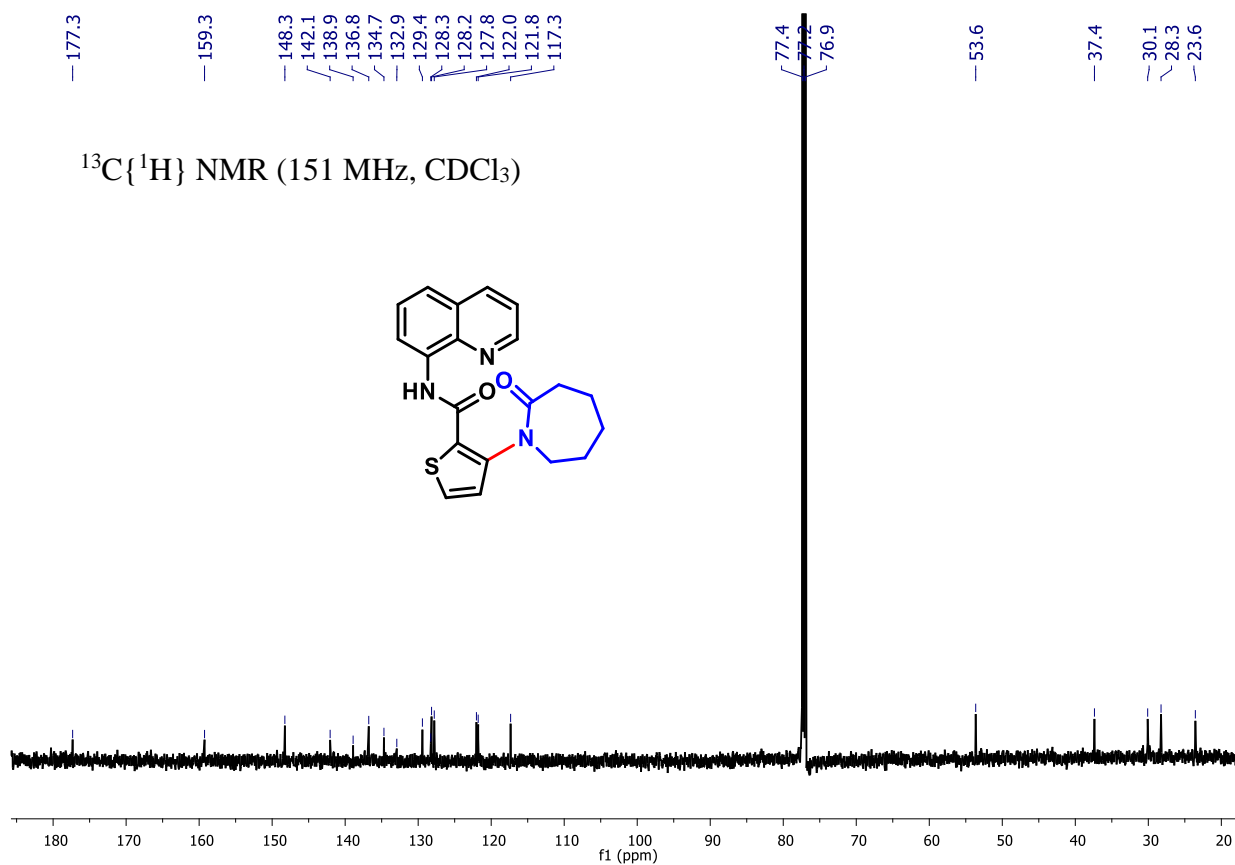

**2-(4-methylpiperidin-1-yl)-N-(quinolin-8-yl)benzamide (5a):**

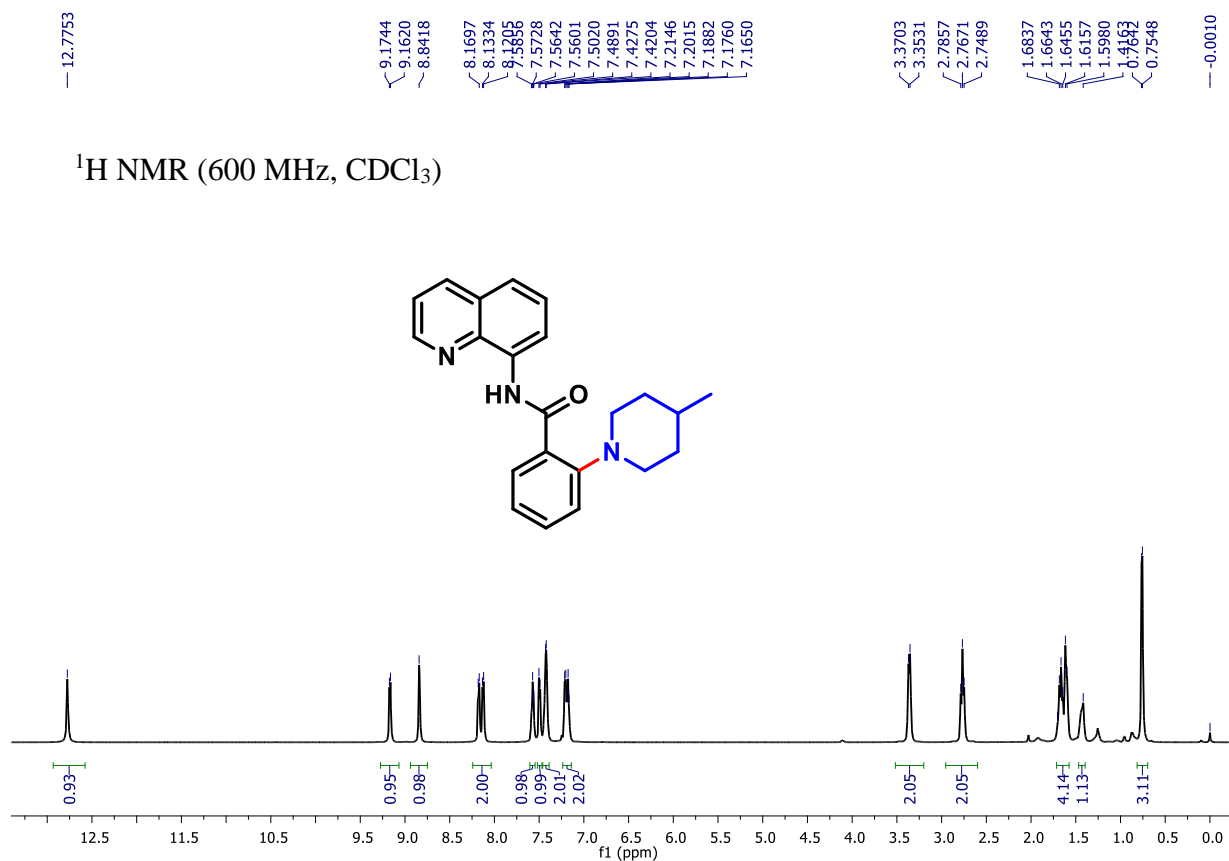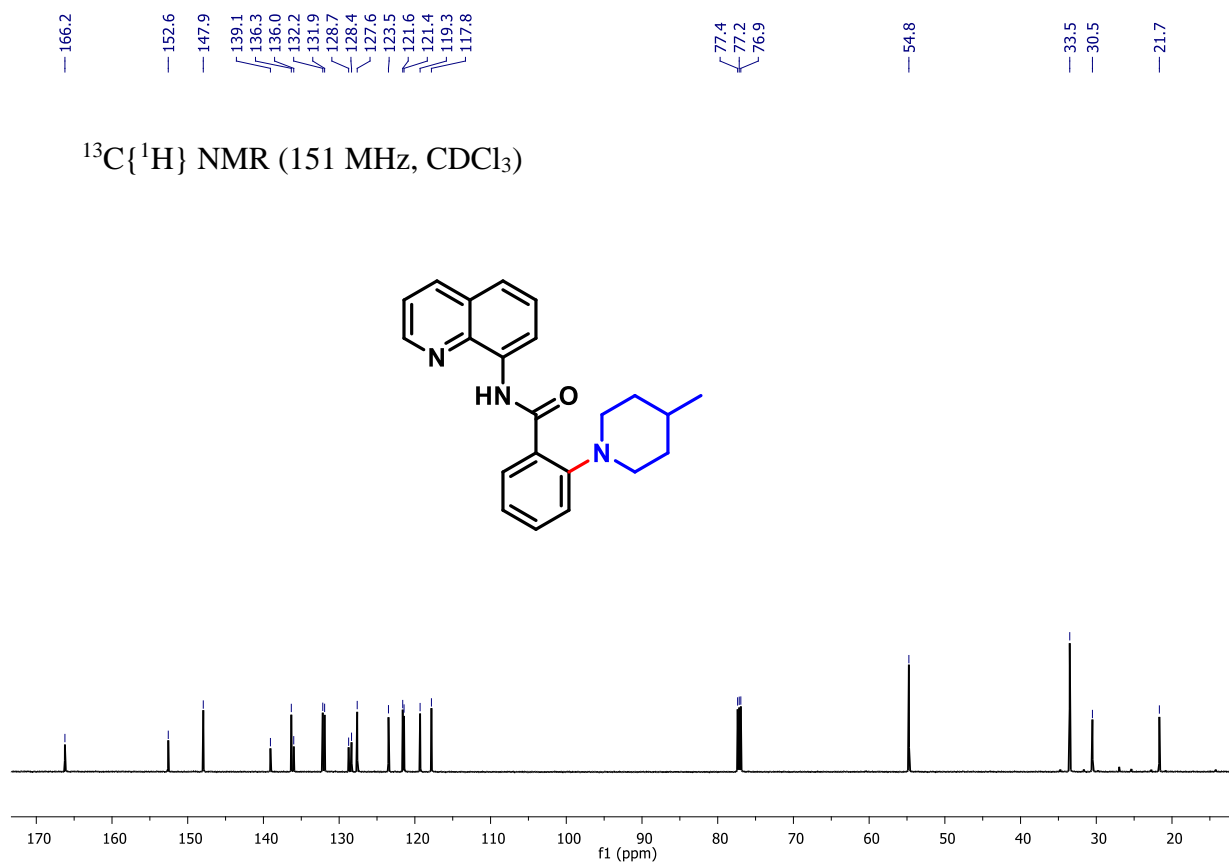

**4-methoxy-2-(4-methylpiperidin-1-yl)-N-(quinolin-8-yl)benzamide (5b):**

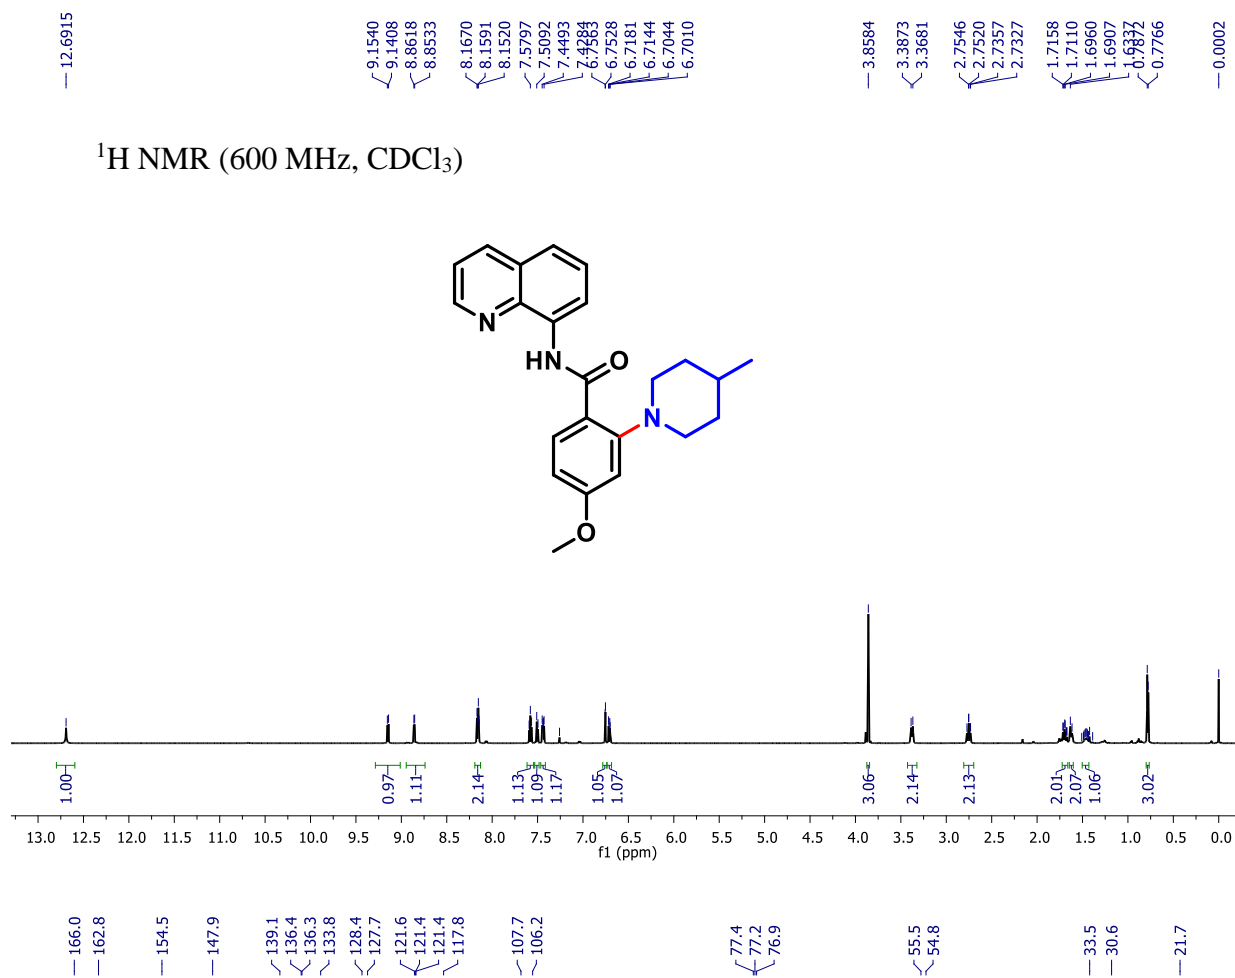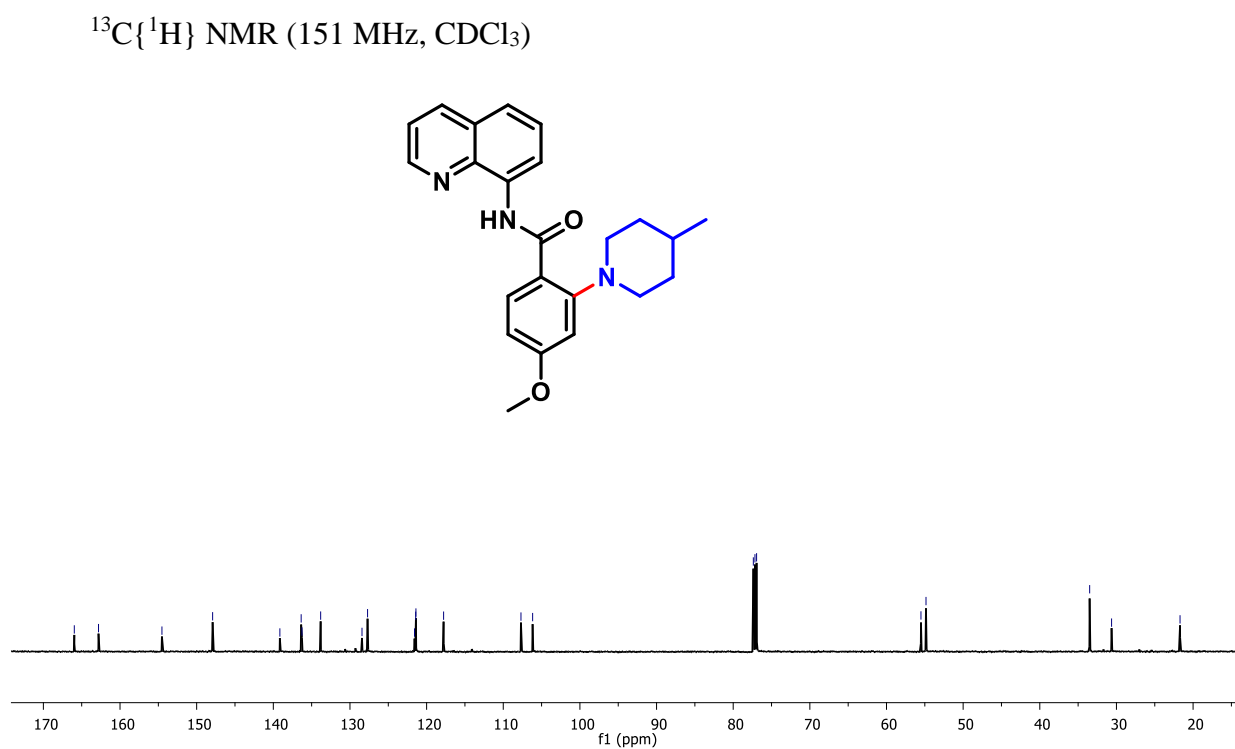



**4-chloro-2-(4-methylpiperidin-1-yl)-N-(quinolin-8-yl)benzamide (5c):**

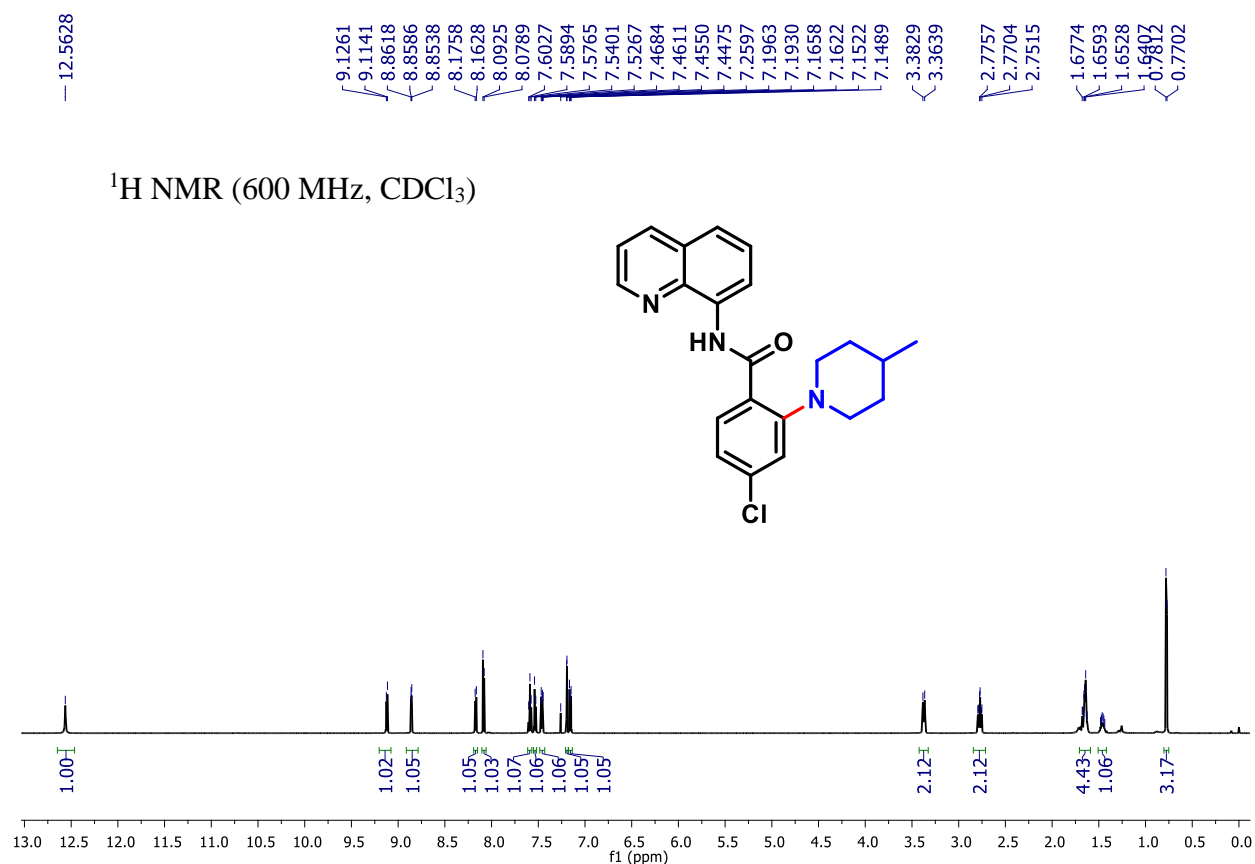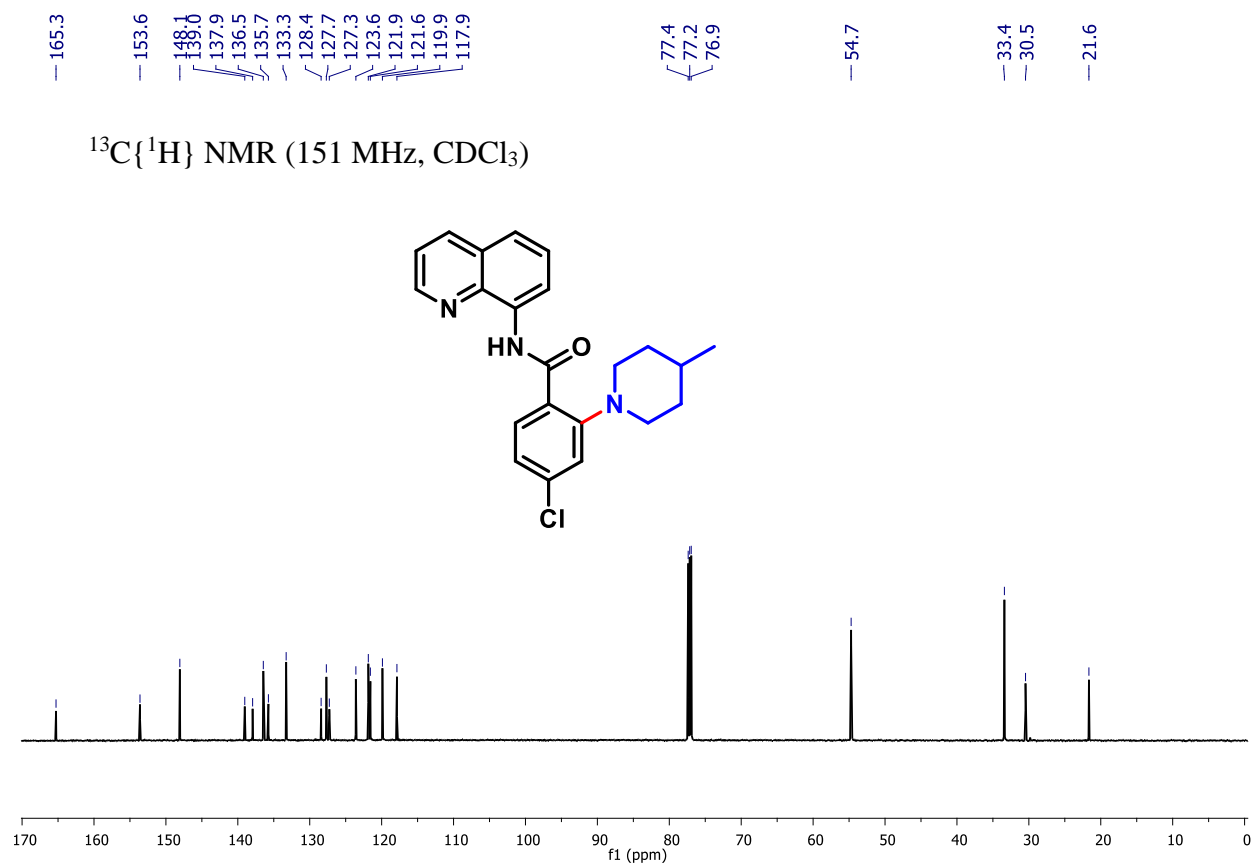

**4-fluoro-2-(4-methylpiperidin-1-yl)-N-(quinolin-8-yl)benzamide (5d):**

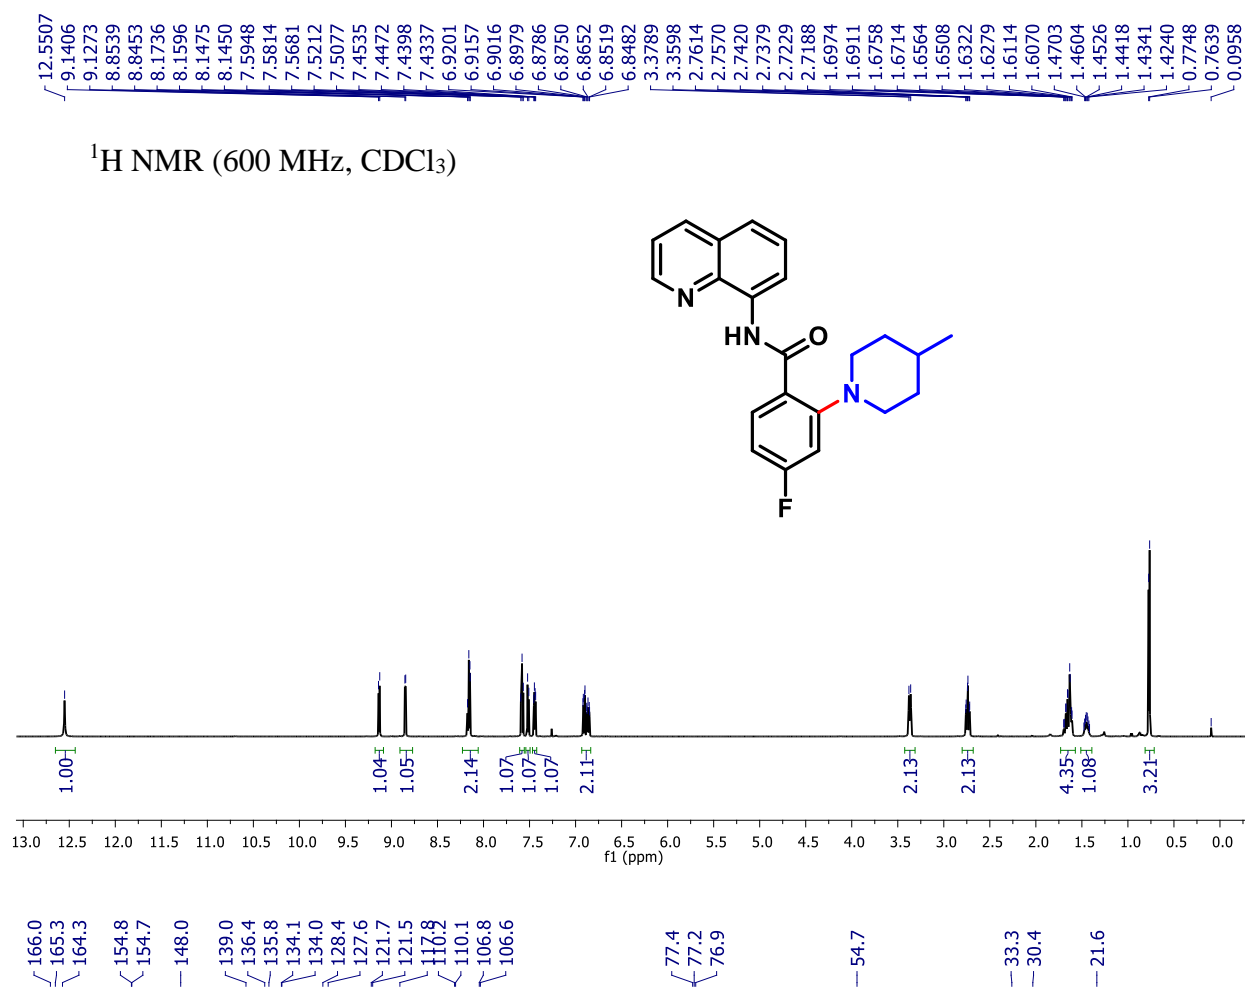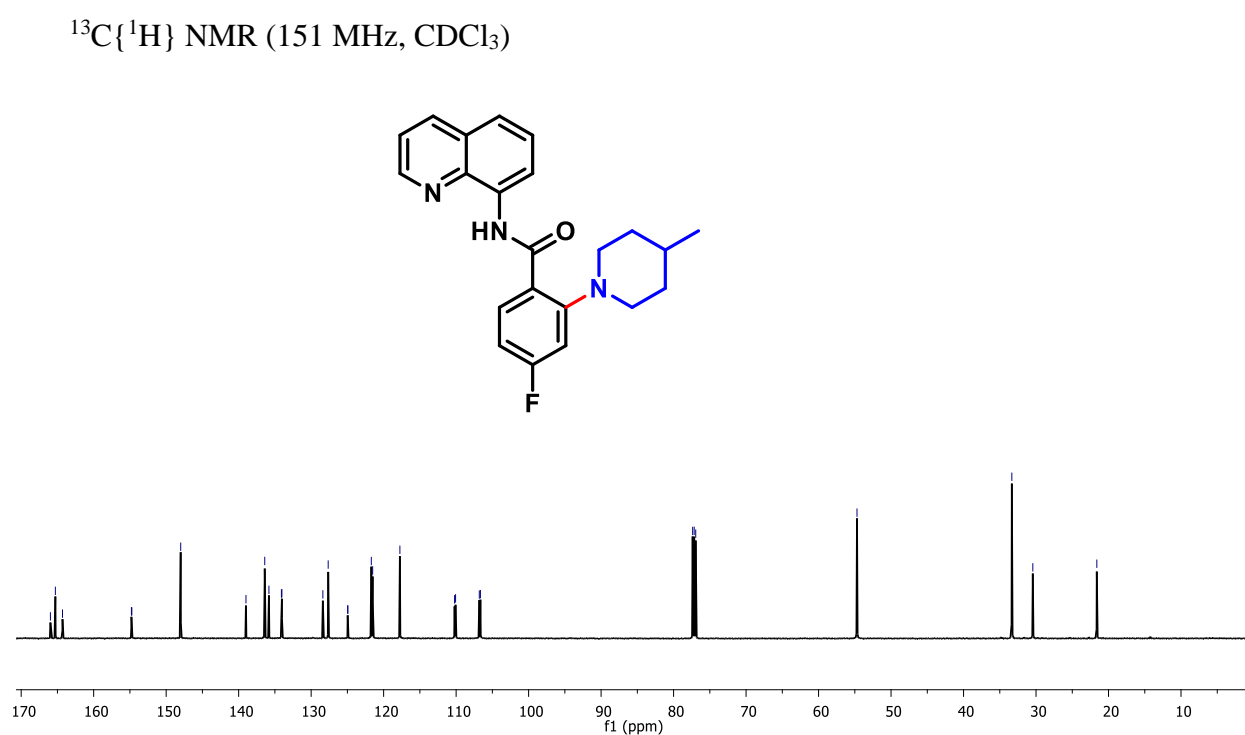

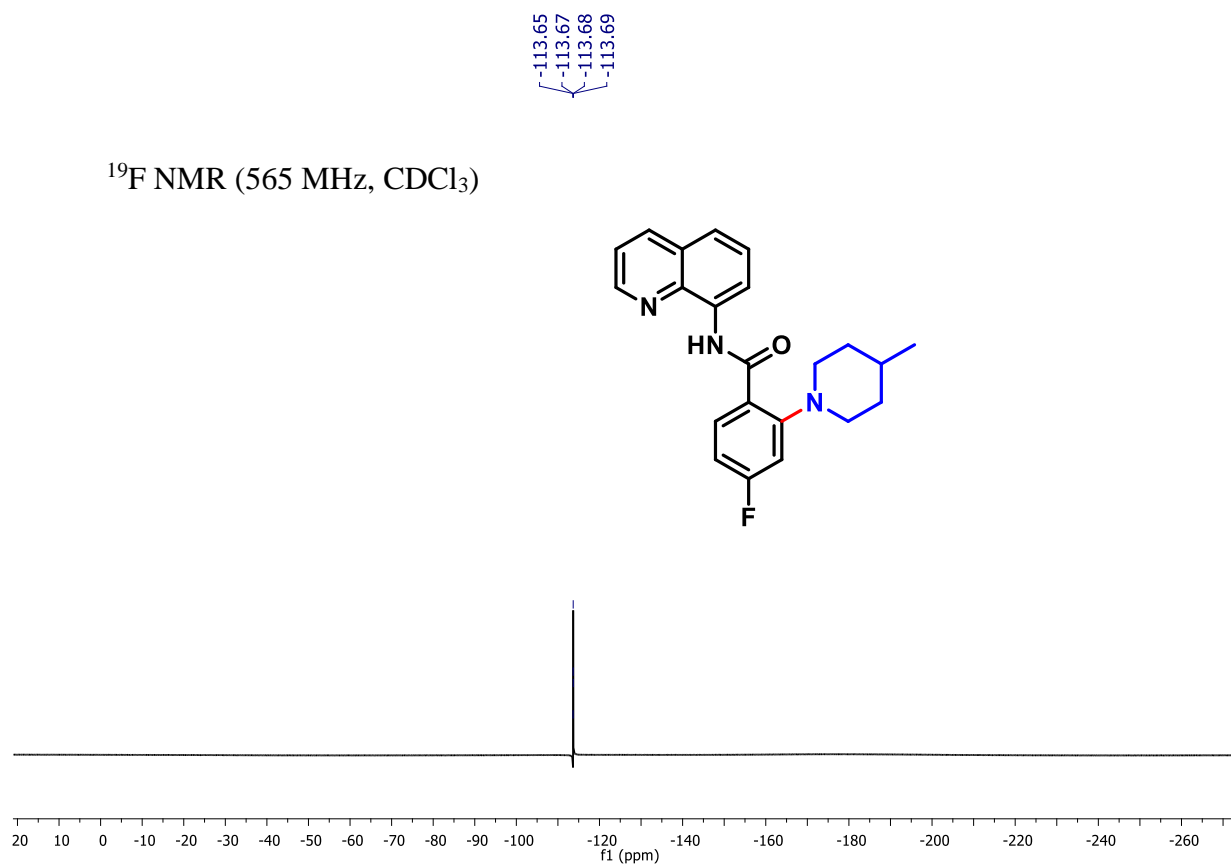

**4-trifluoromethyl-2-(4-methylpiperidin-1-yl)-N-(quinolin-8-yl)benzamide (5e):**

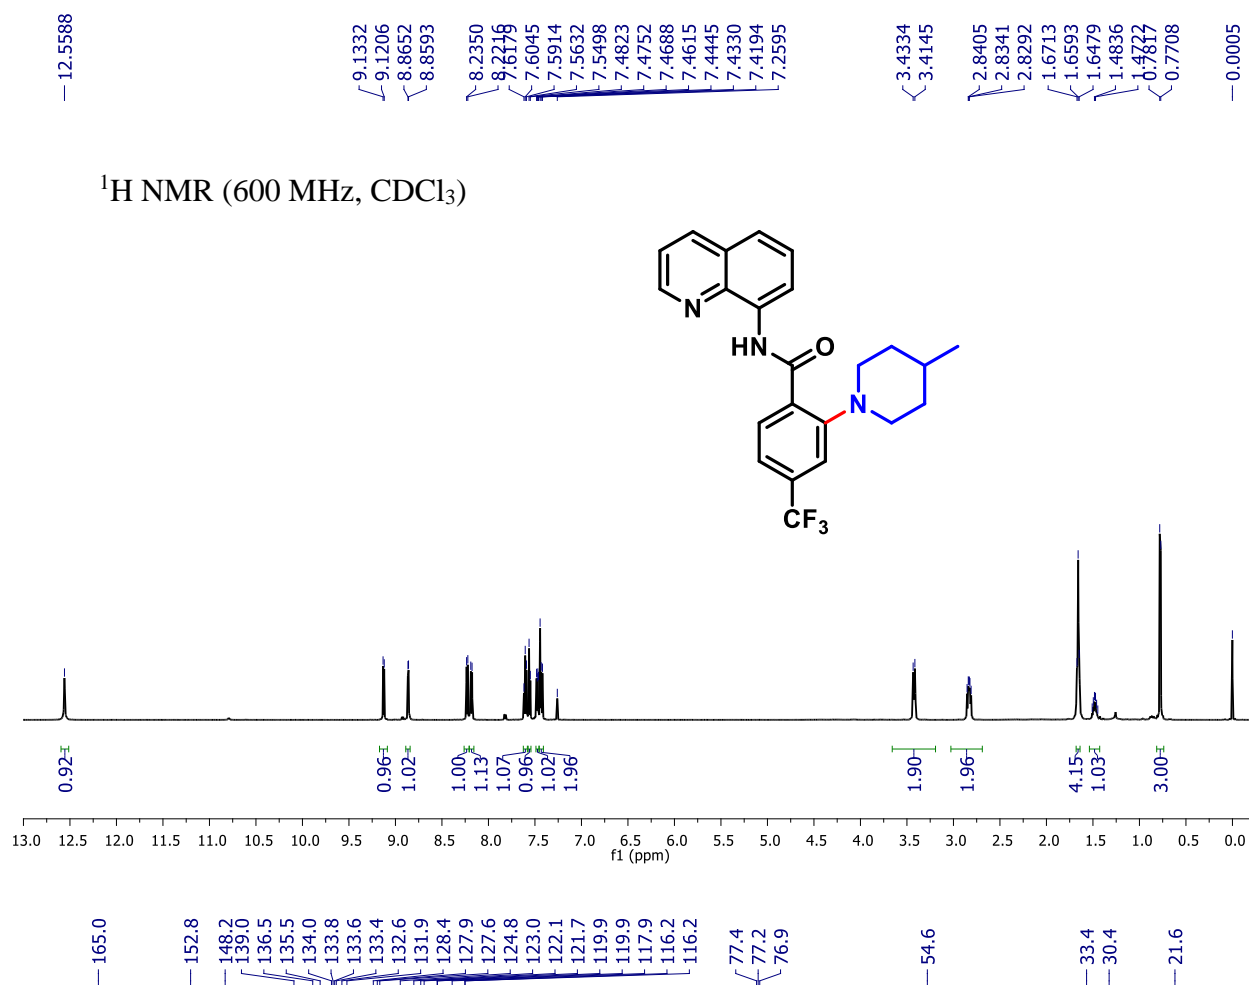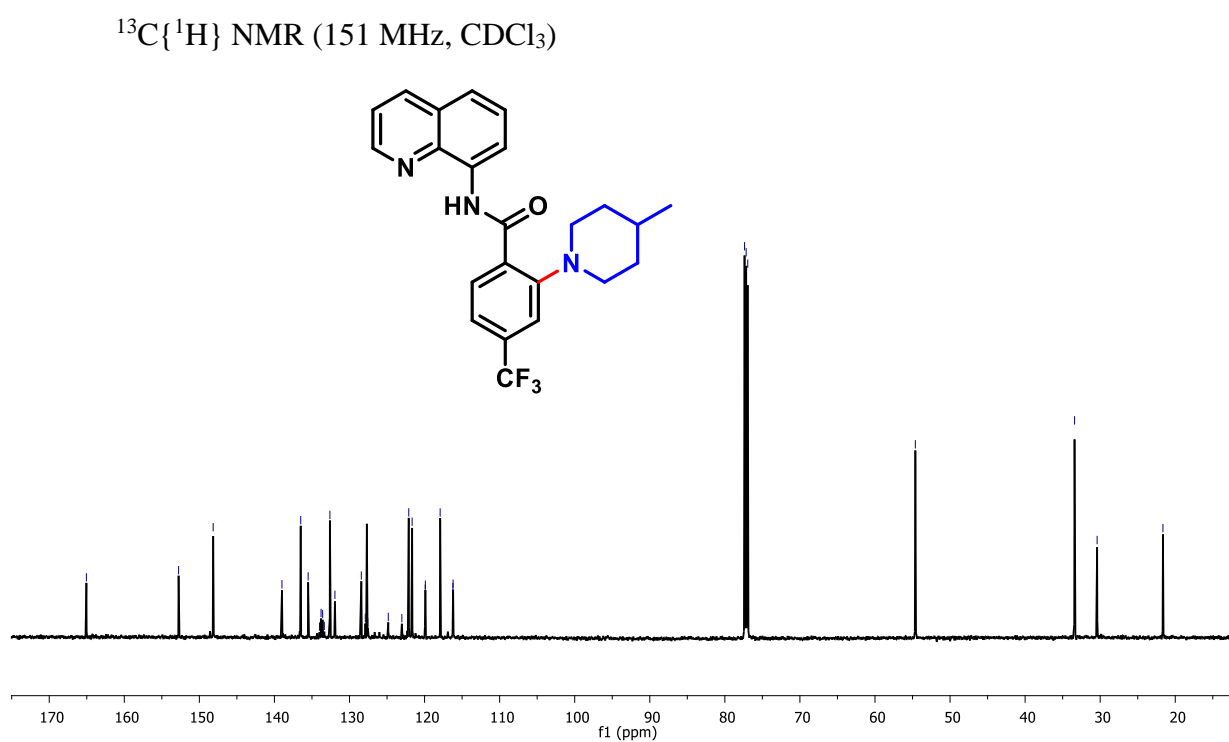

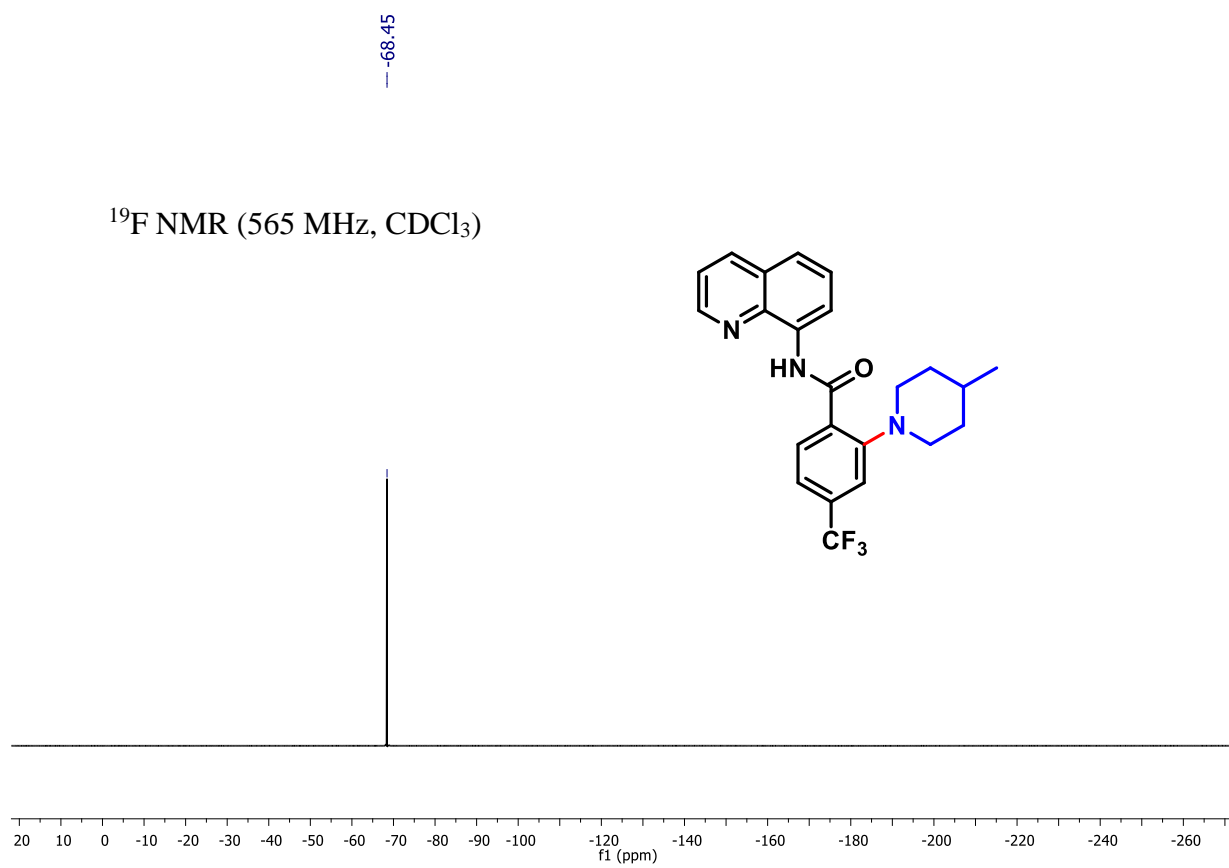

**2-(4-phenylpiperidin-1-yl)-N-(quinolin-8-yl)benzamide (5f):**

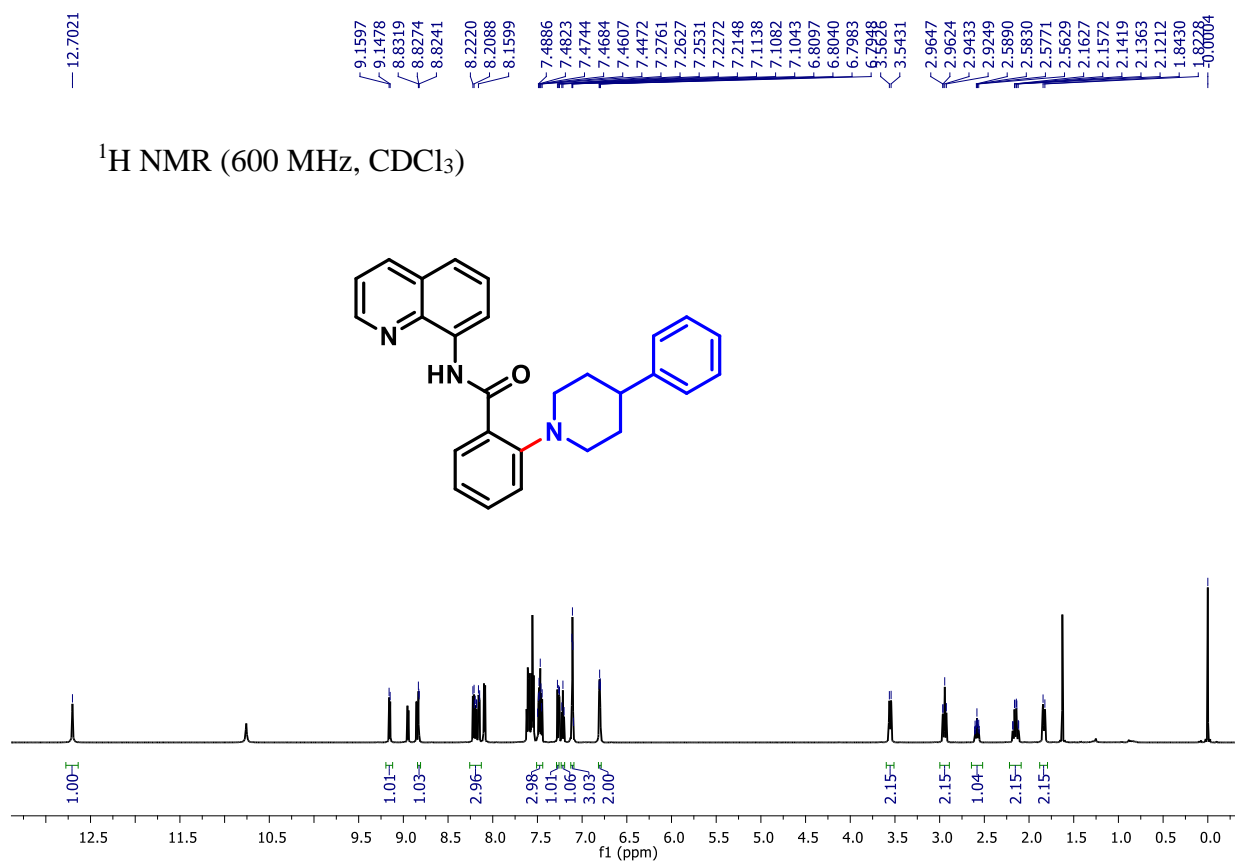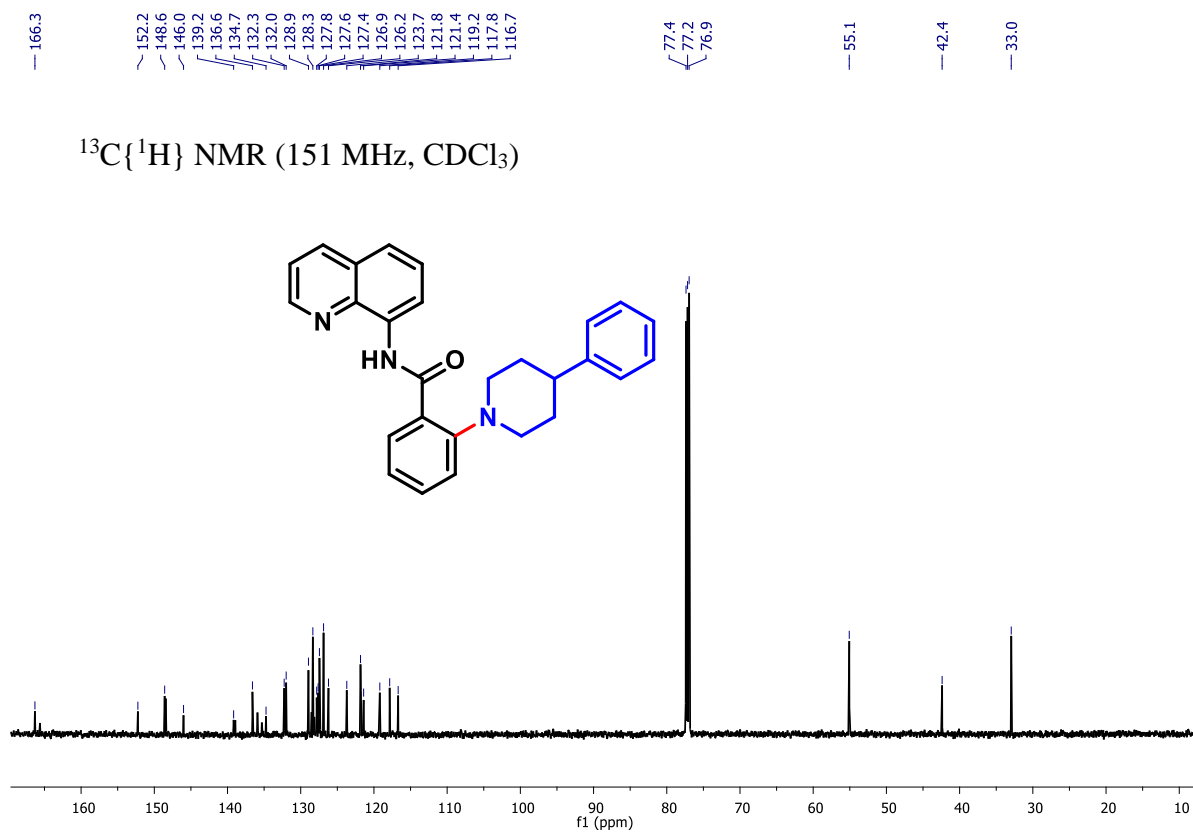

**4-methoxy-2-(4-phenylpiperidin-1-yl)-N-(quinolin-8-yl)benzamide (5g):**

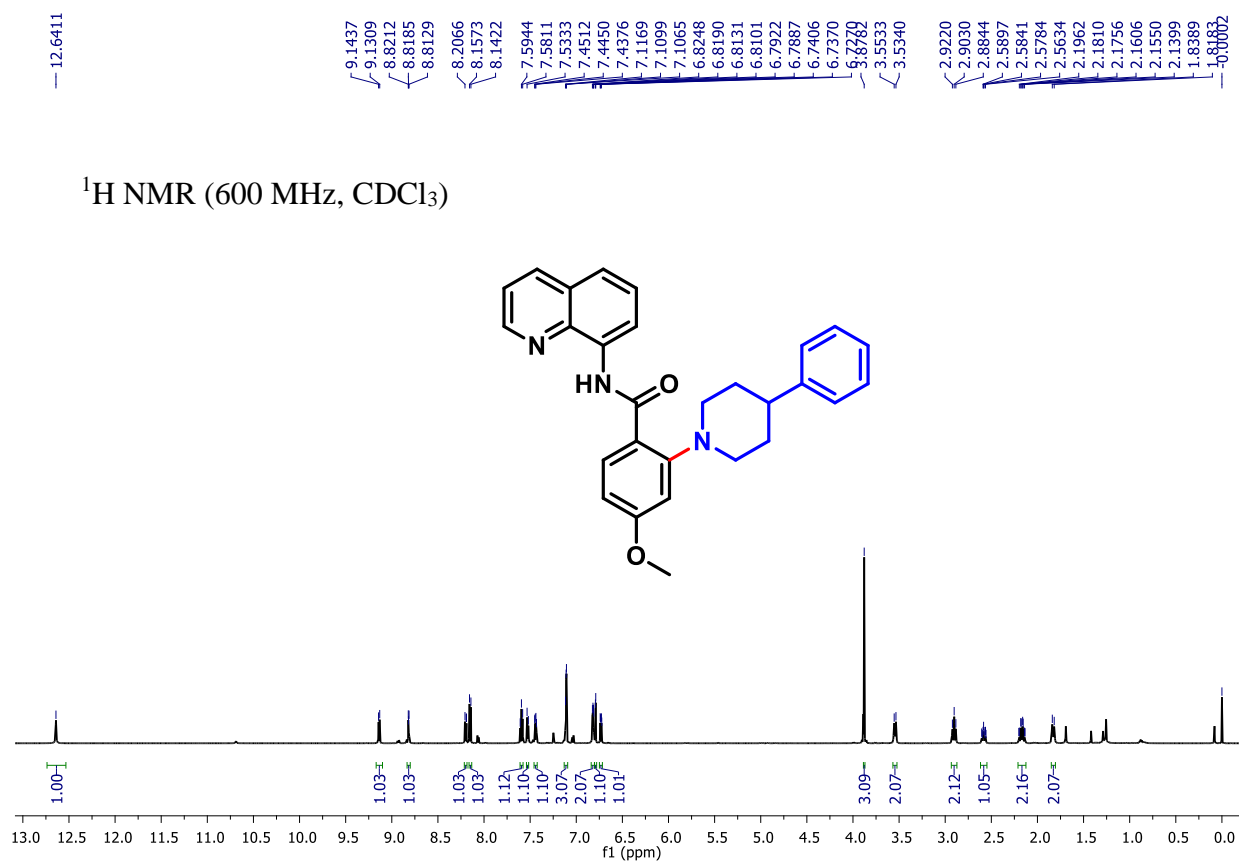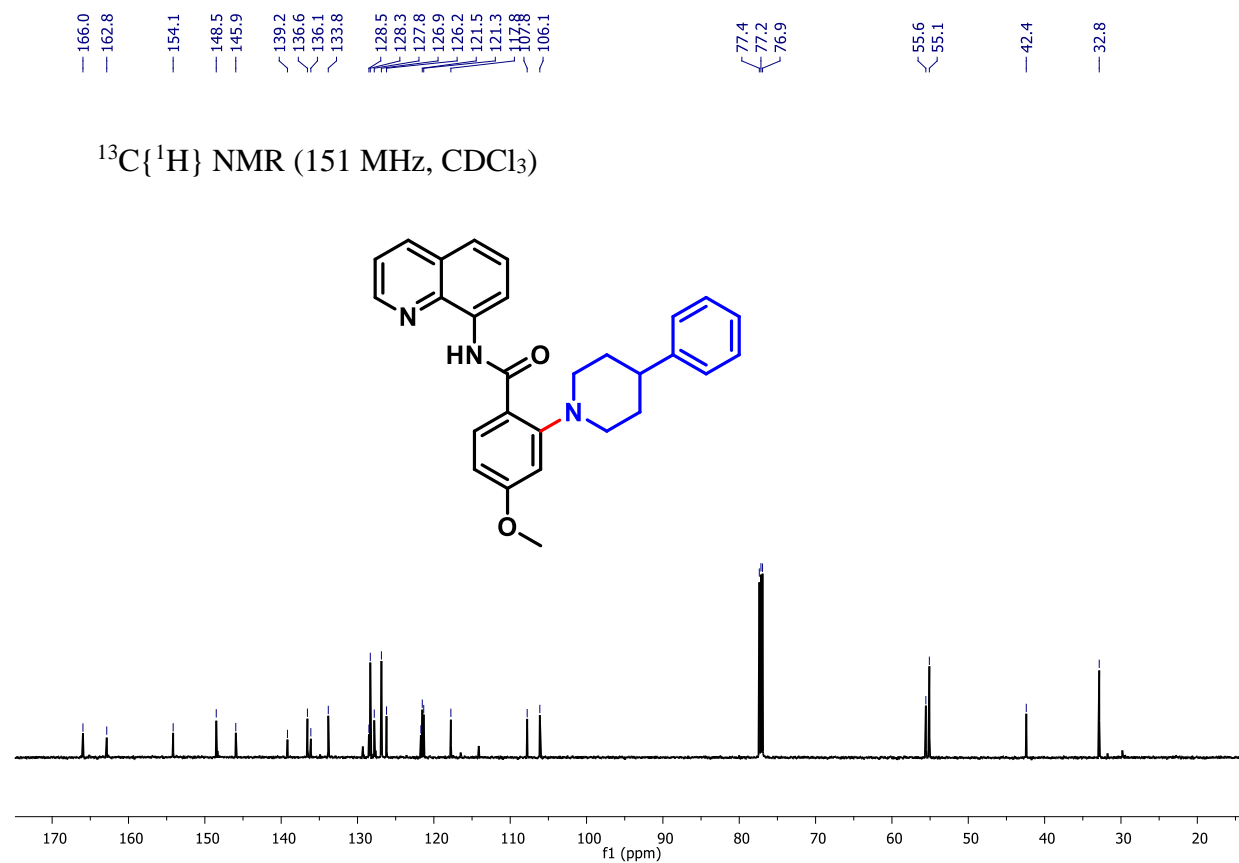

**4-chloro-2-(4-phenylpiperidin-1-yl)-N-(quinolin-8-yl) benzamide (5h):**

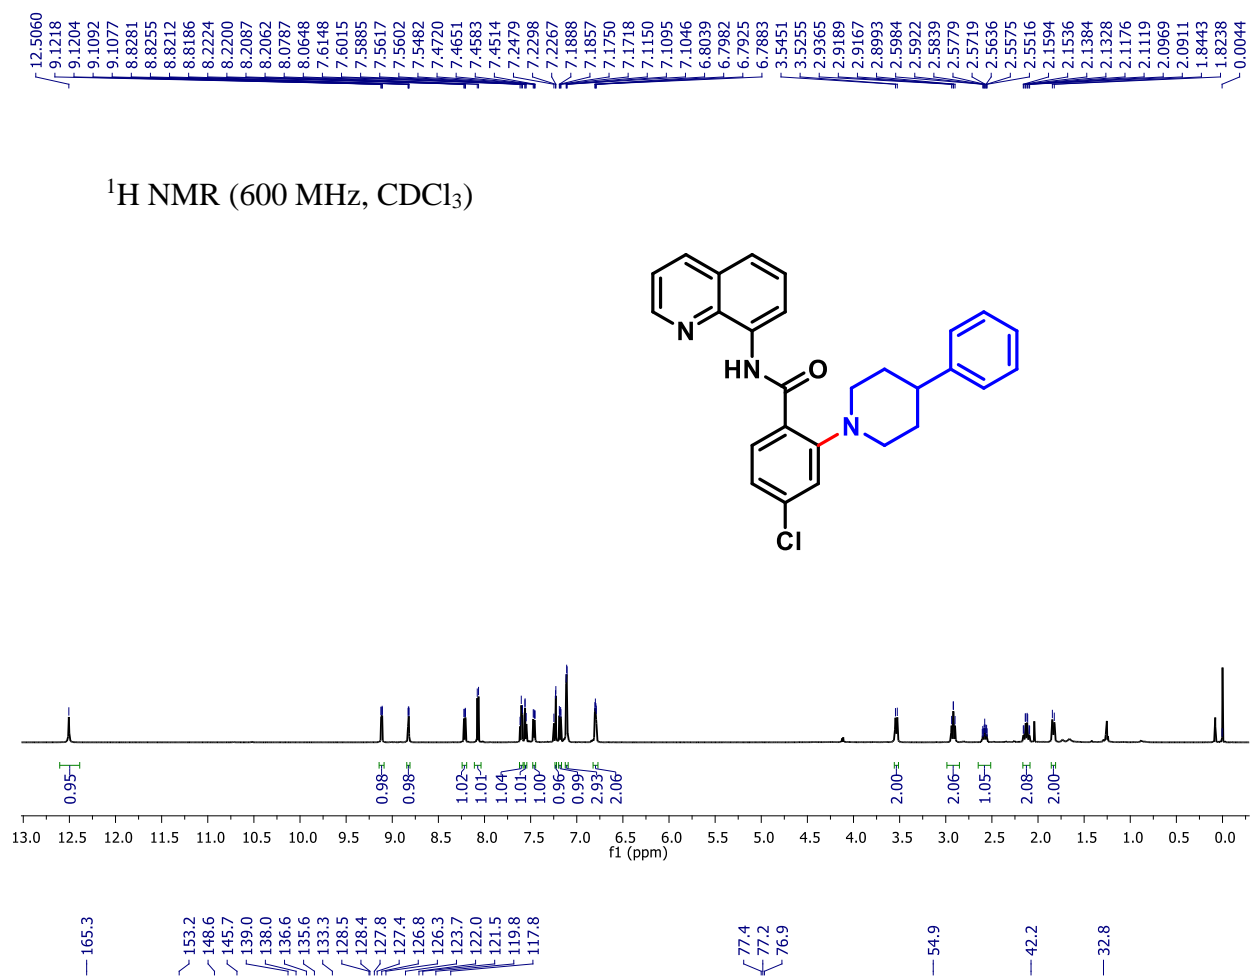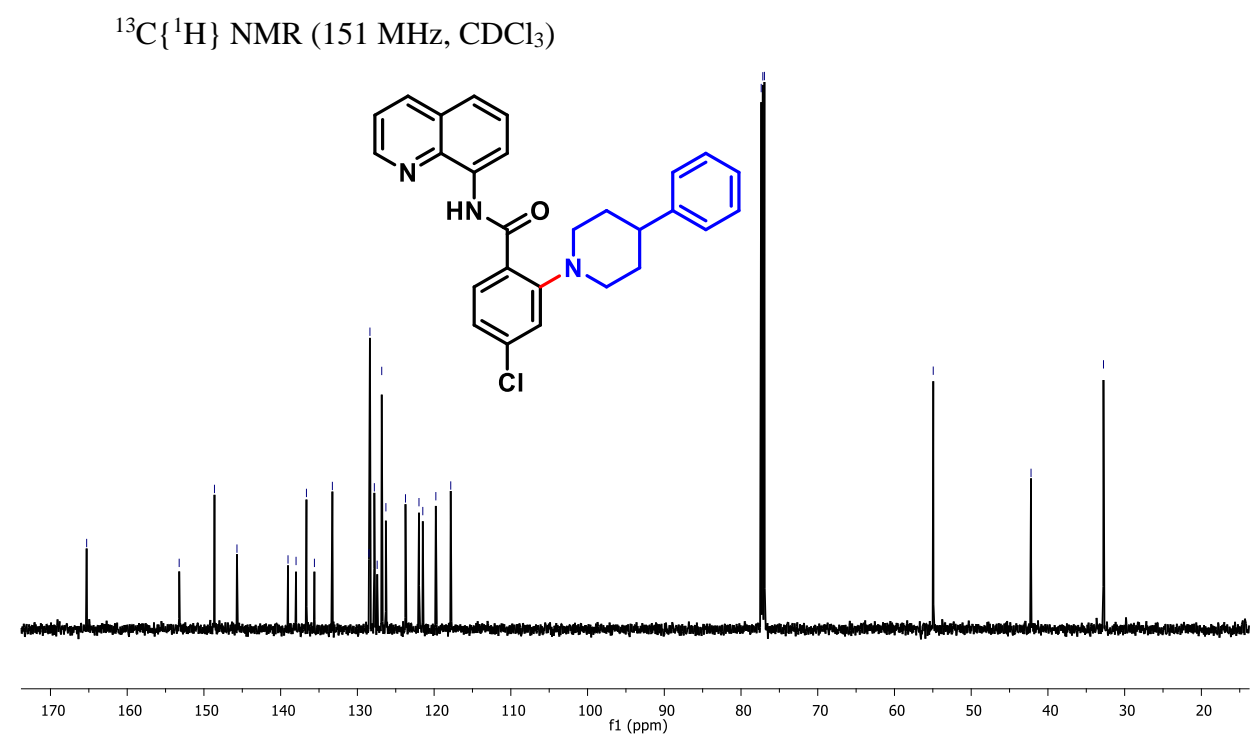



**5-methyl-2-(4-methylpiperidin-1-yl)-N-(quinolin-8-yl)benzamide (5i):**

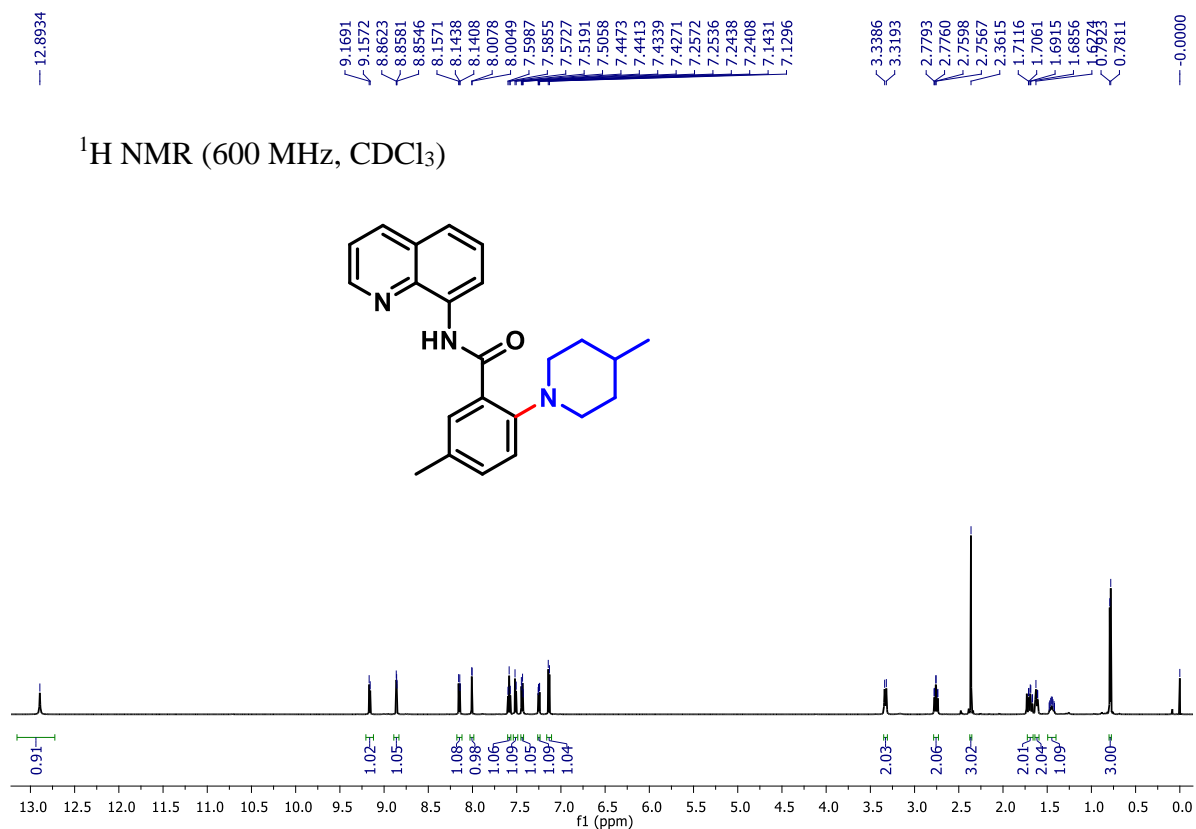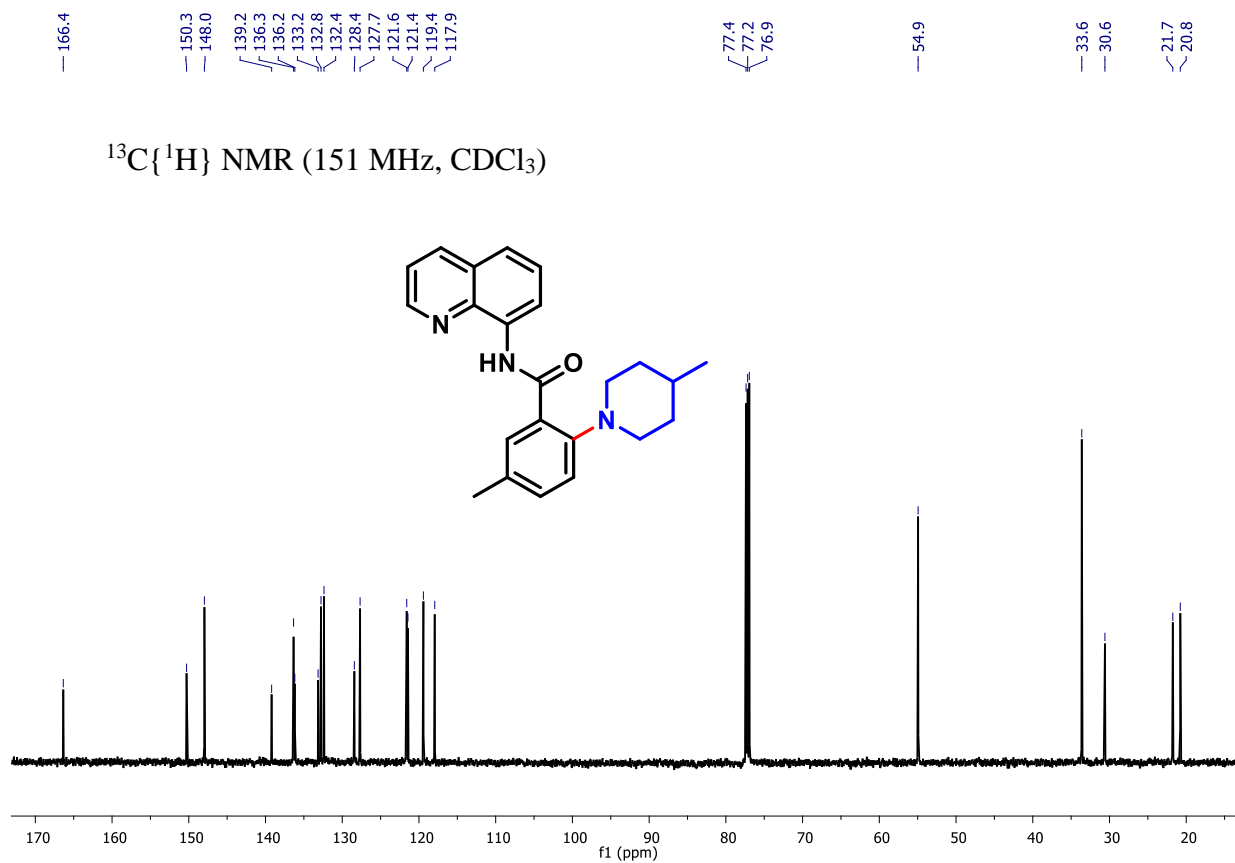

## 2-morpholino-N-(quinolin-8-yl)benzamide (5j)

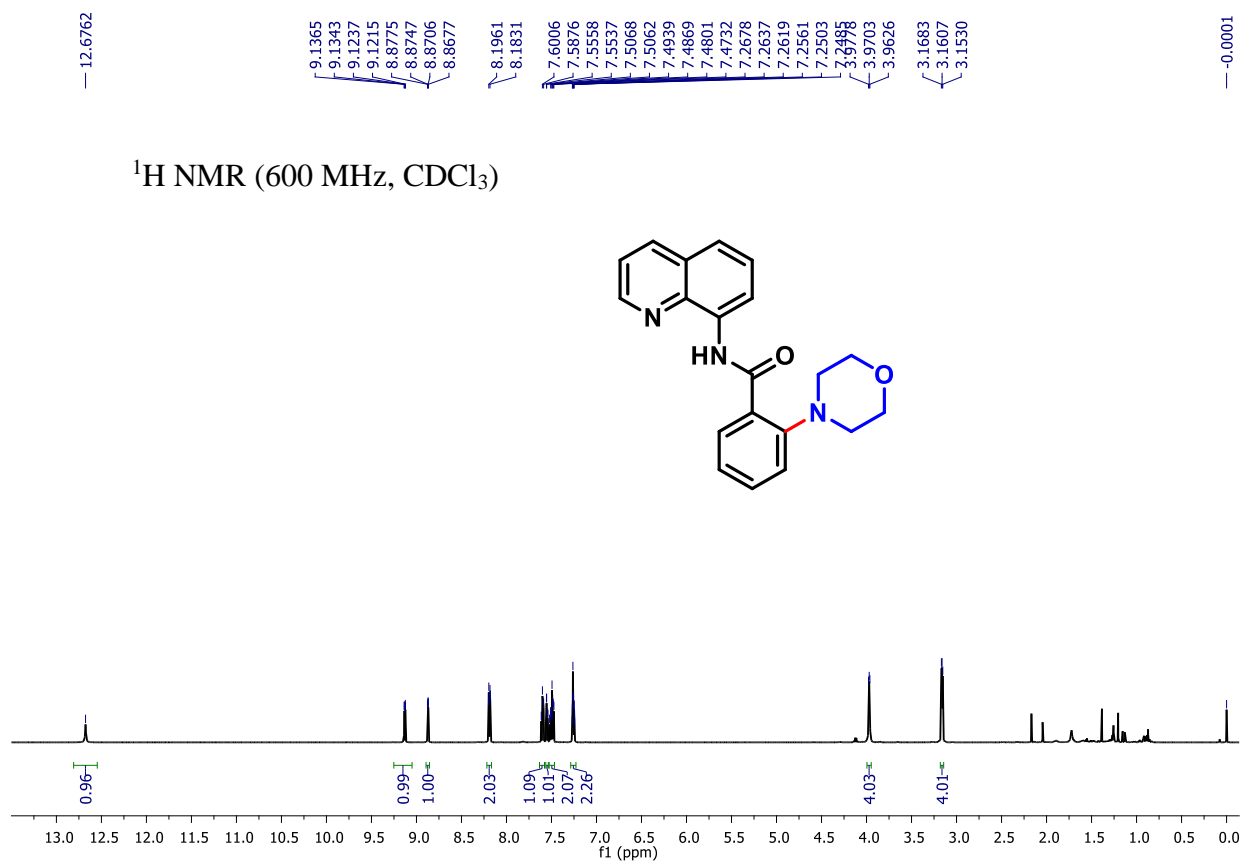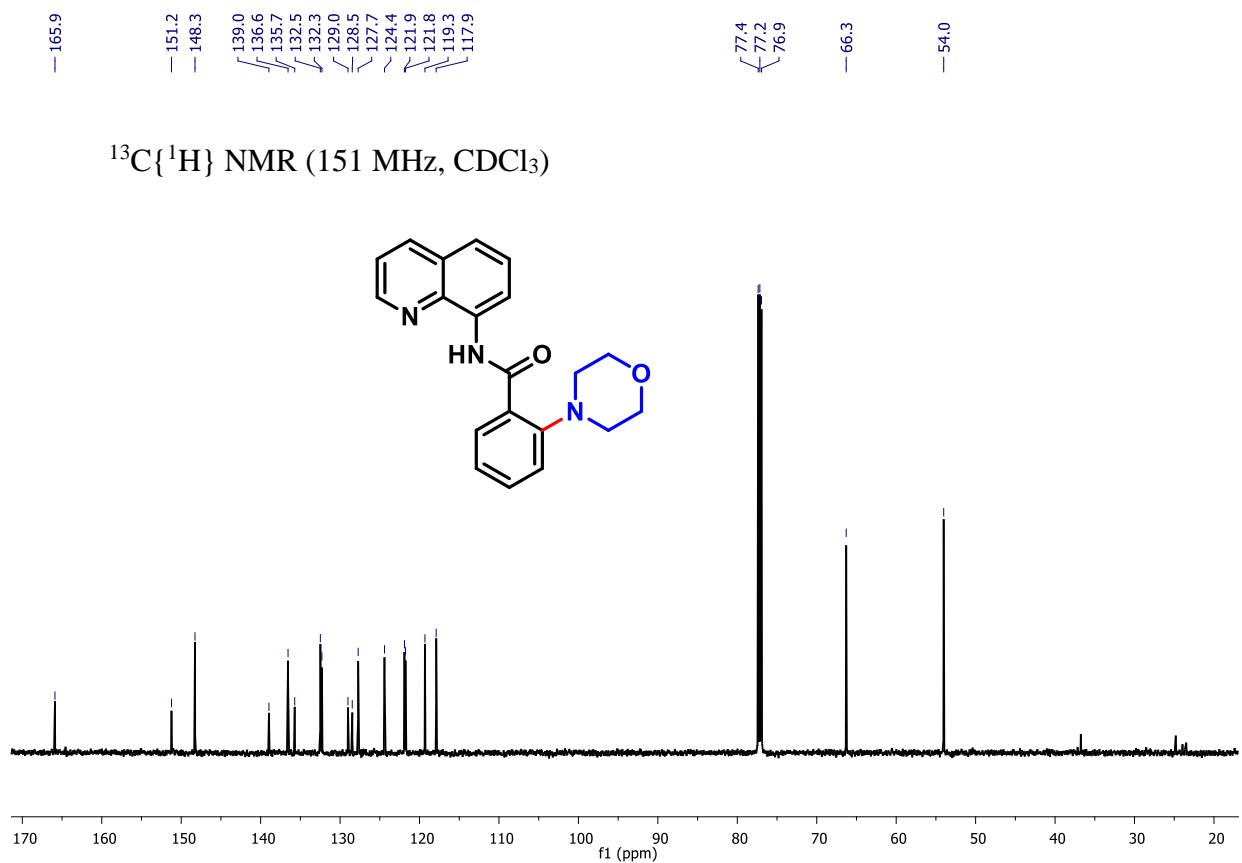

# 4-methyl-2-morpholino-N-(quinolin-8-yl)benzamide (5k)

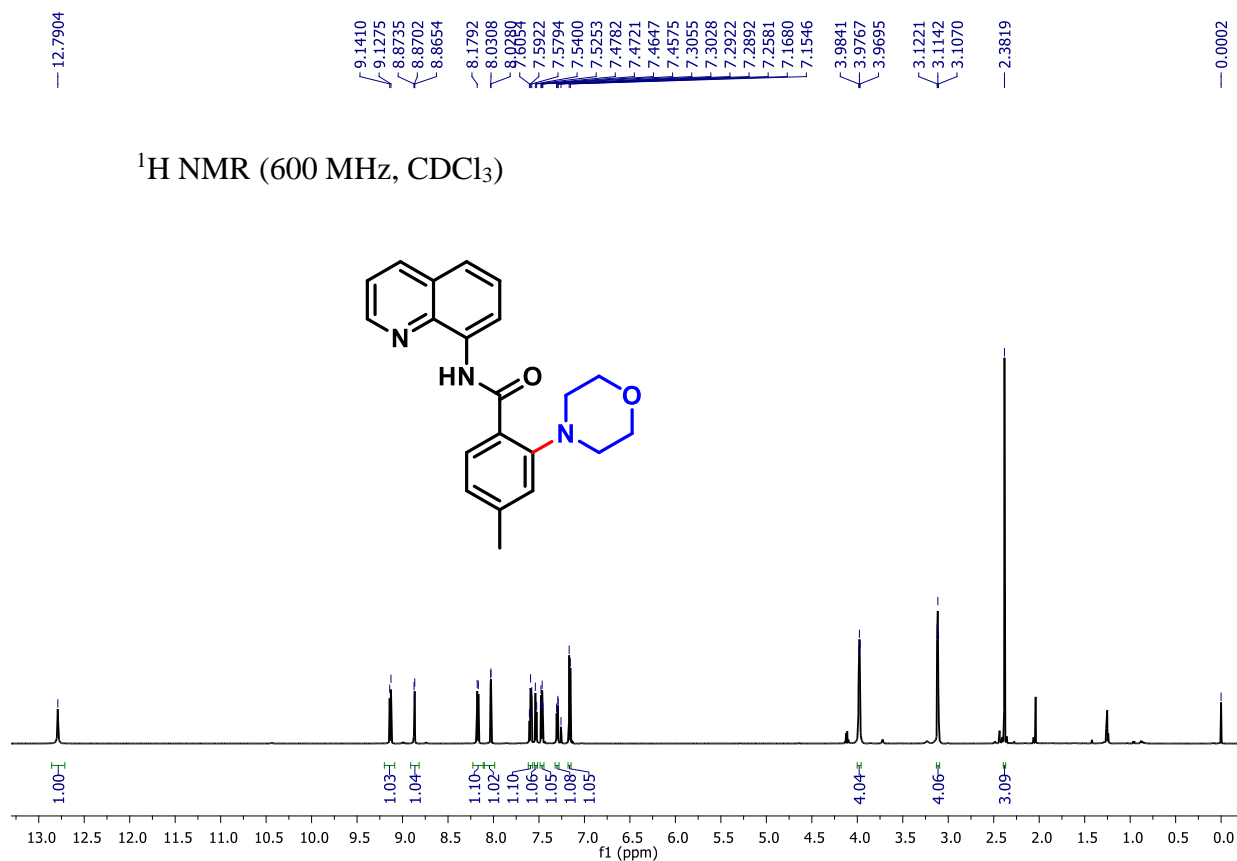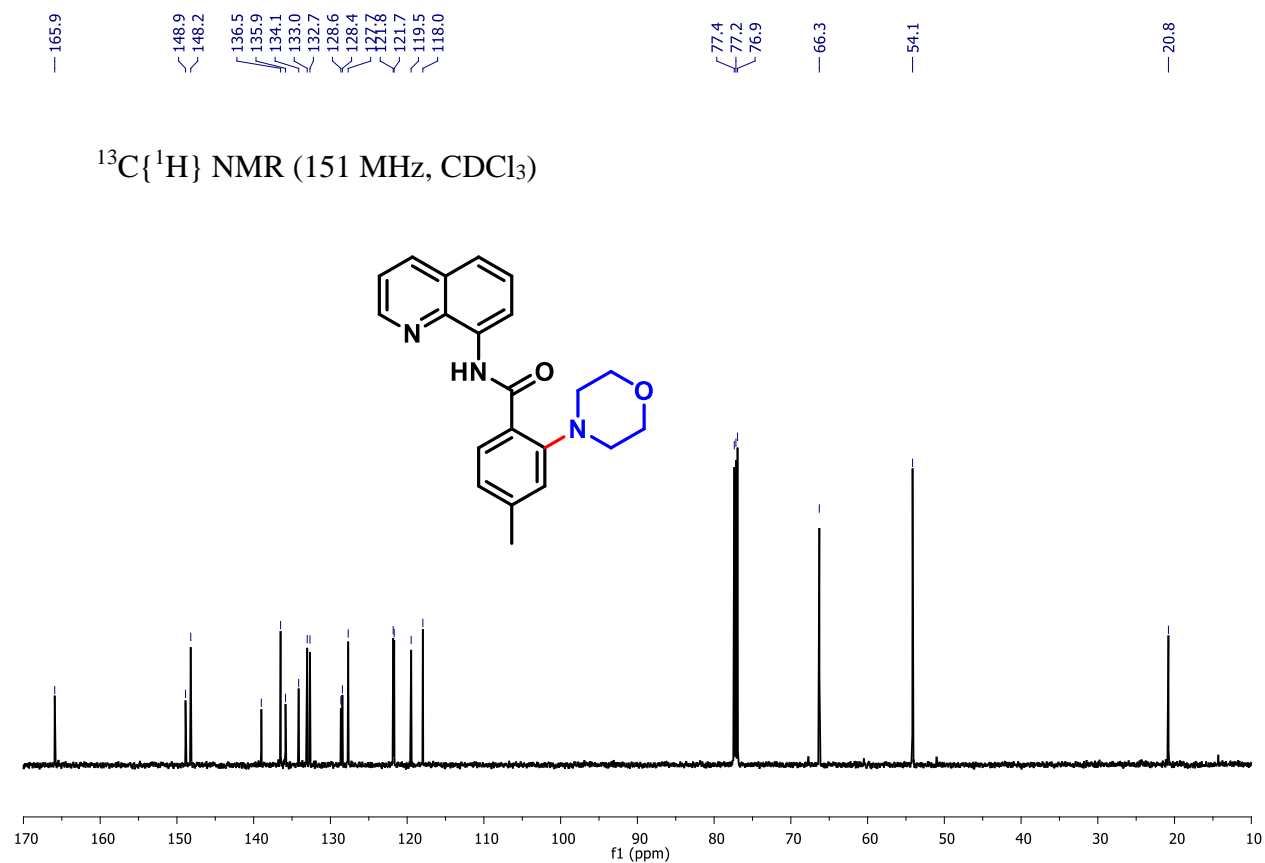

# 4-fluoro-2-morpholino-N-(quinolin-8-yl)benzamide (5l)

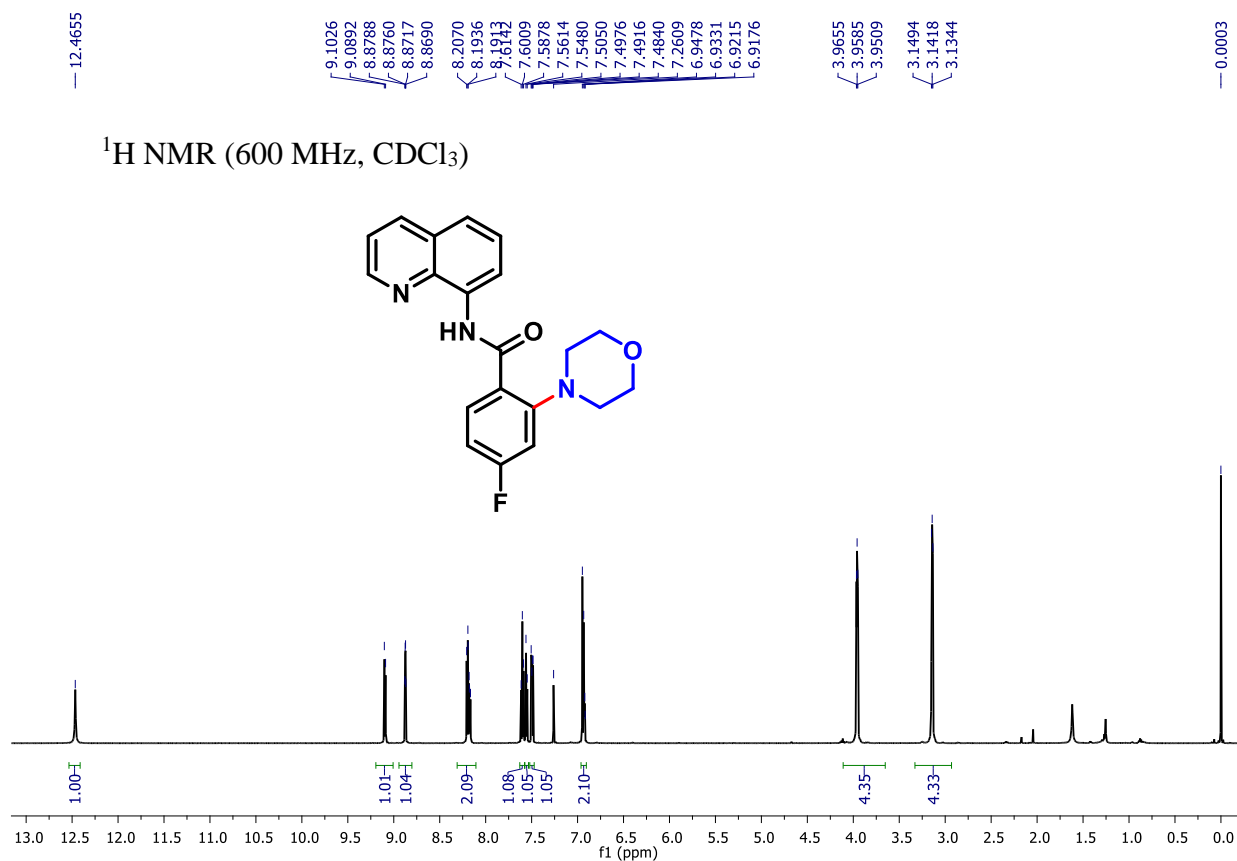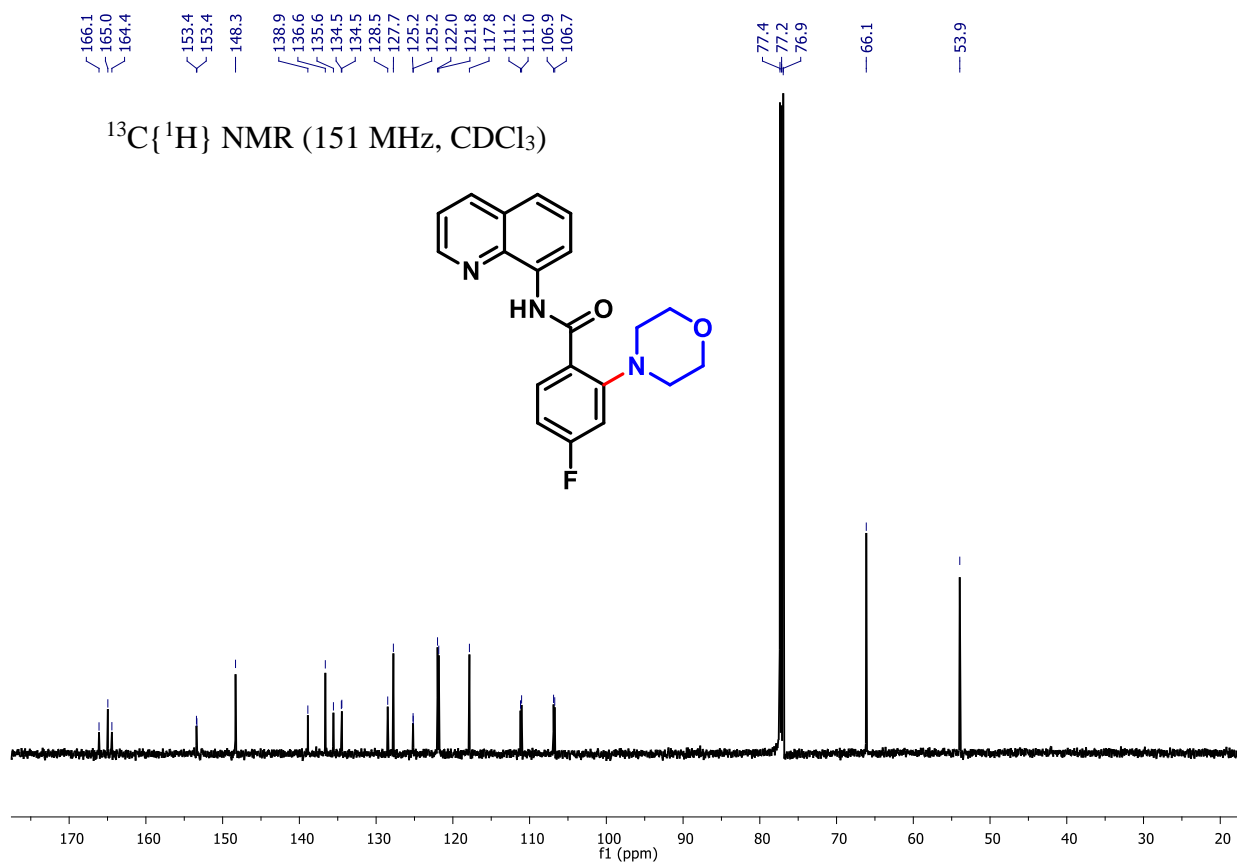

$^{19}\text{F}$  NMR (565 MHz,  $\text{CDCl}_3$ )

-113.32  
-113.33  
-113.34  
-113.36

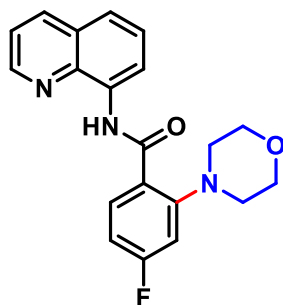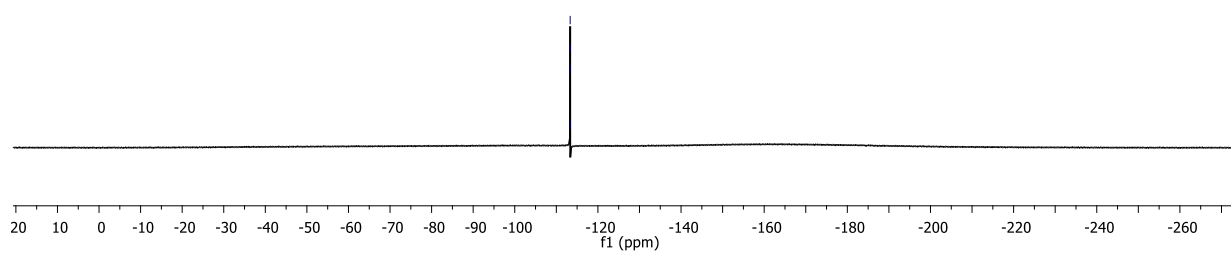

**4-methoxy-2-morpholino-N-(quinolin-8-yl)benzamide (5m):**

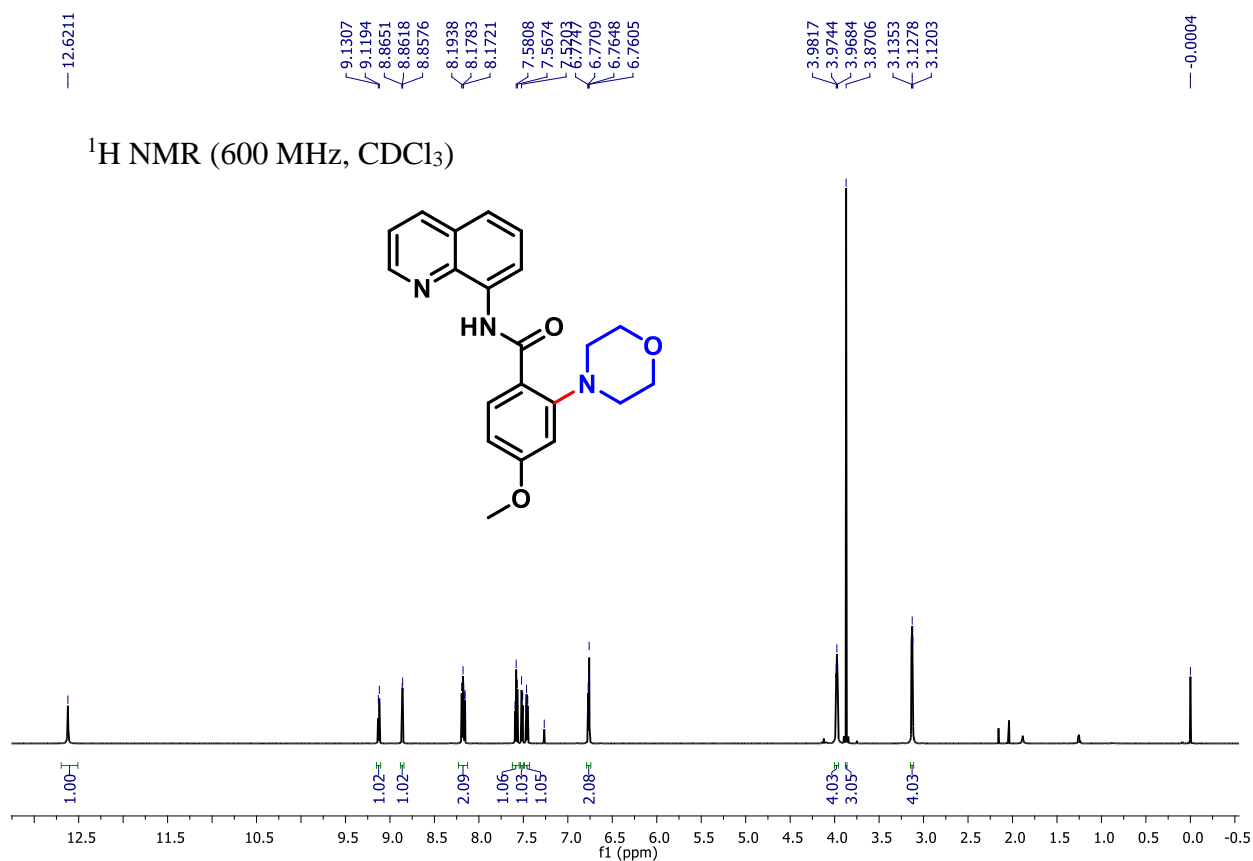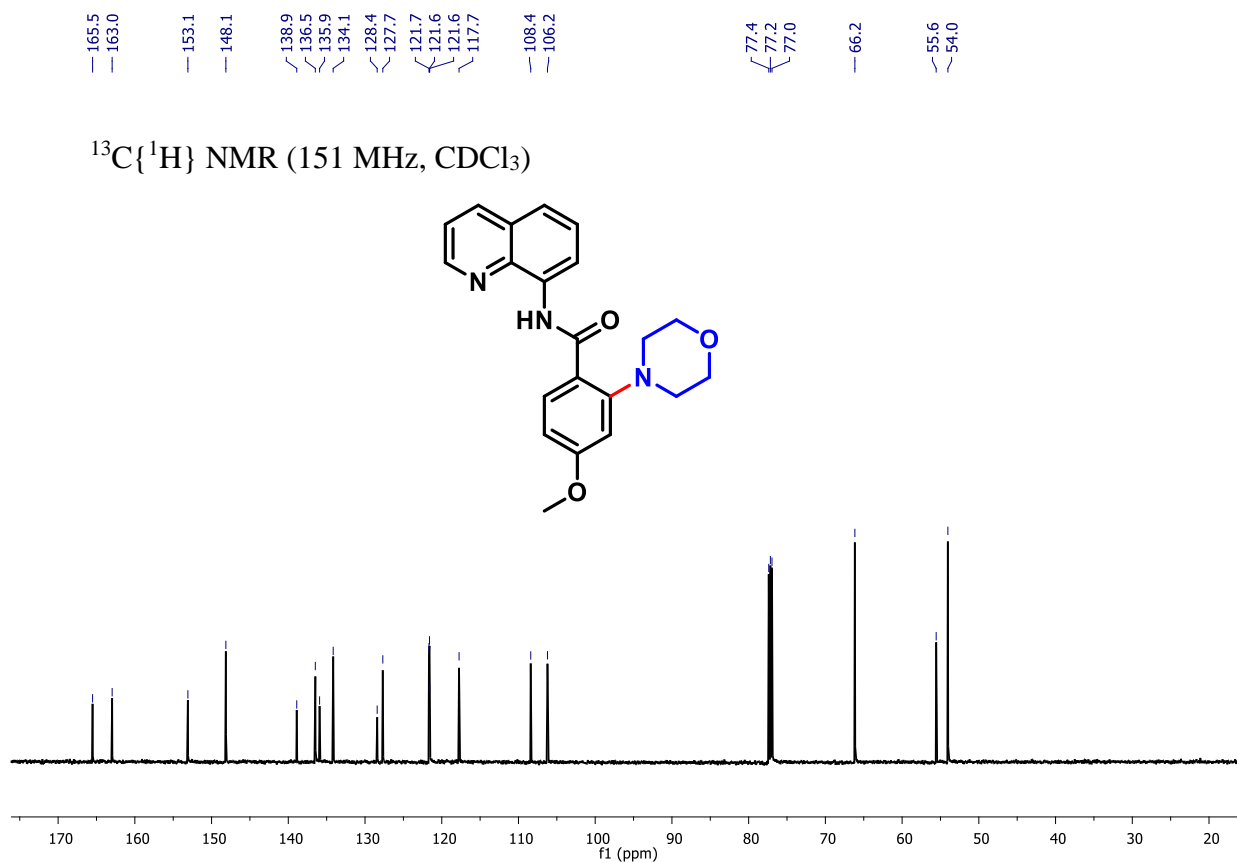

**2-chloro-6-morpholino-4-nitro-N-(quinolin-8-yl)benzamide (5n):**

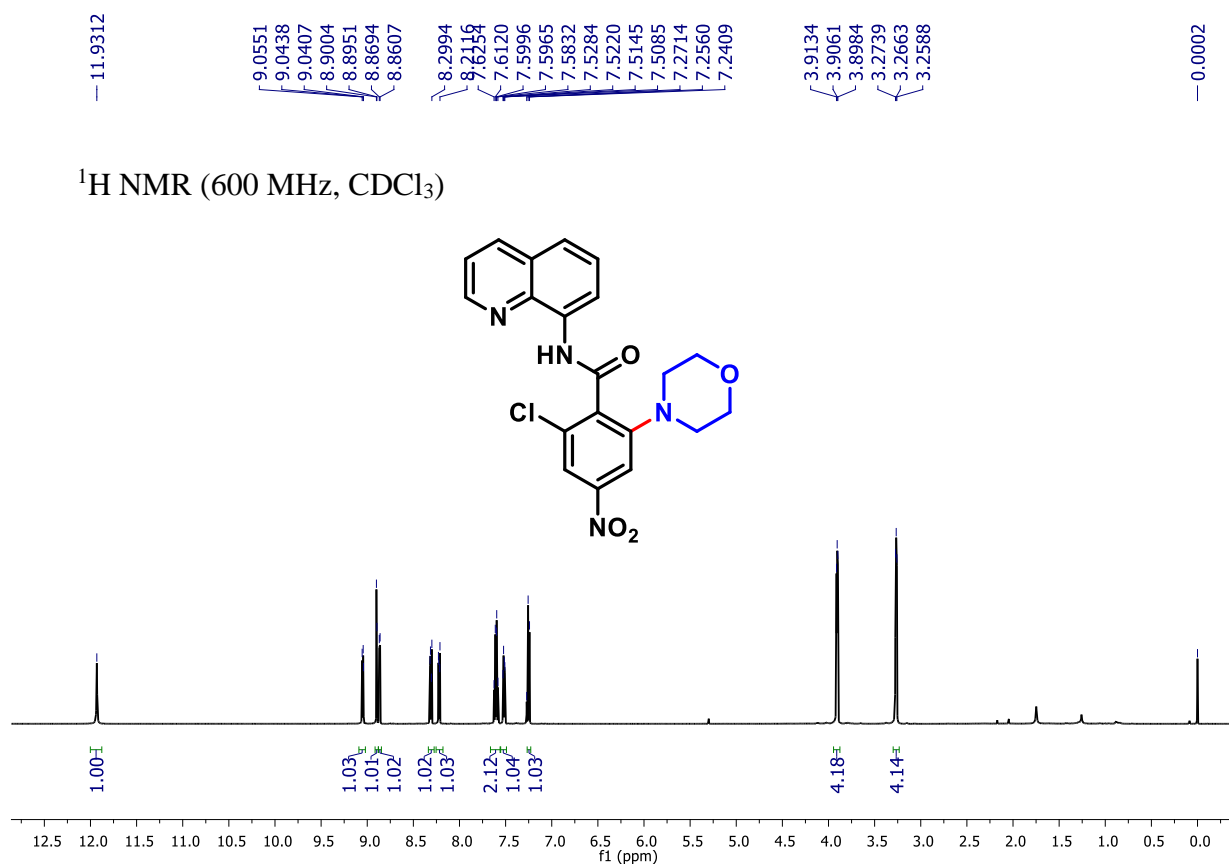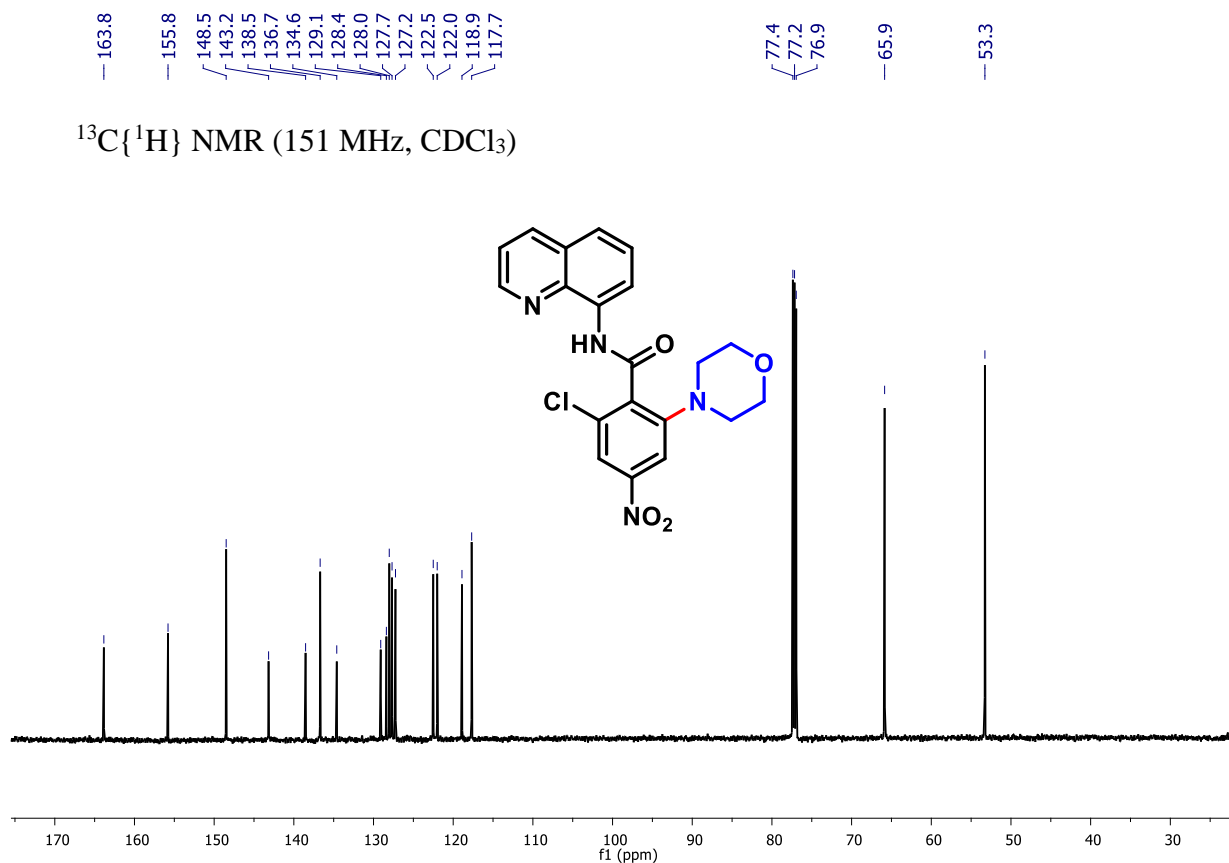

## 2-Morpholino-N-(quinolin-8-yl)-1-naphthamide (5o):

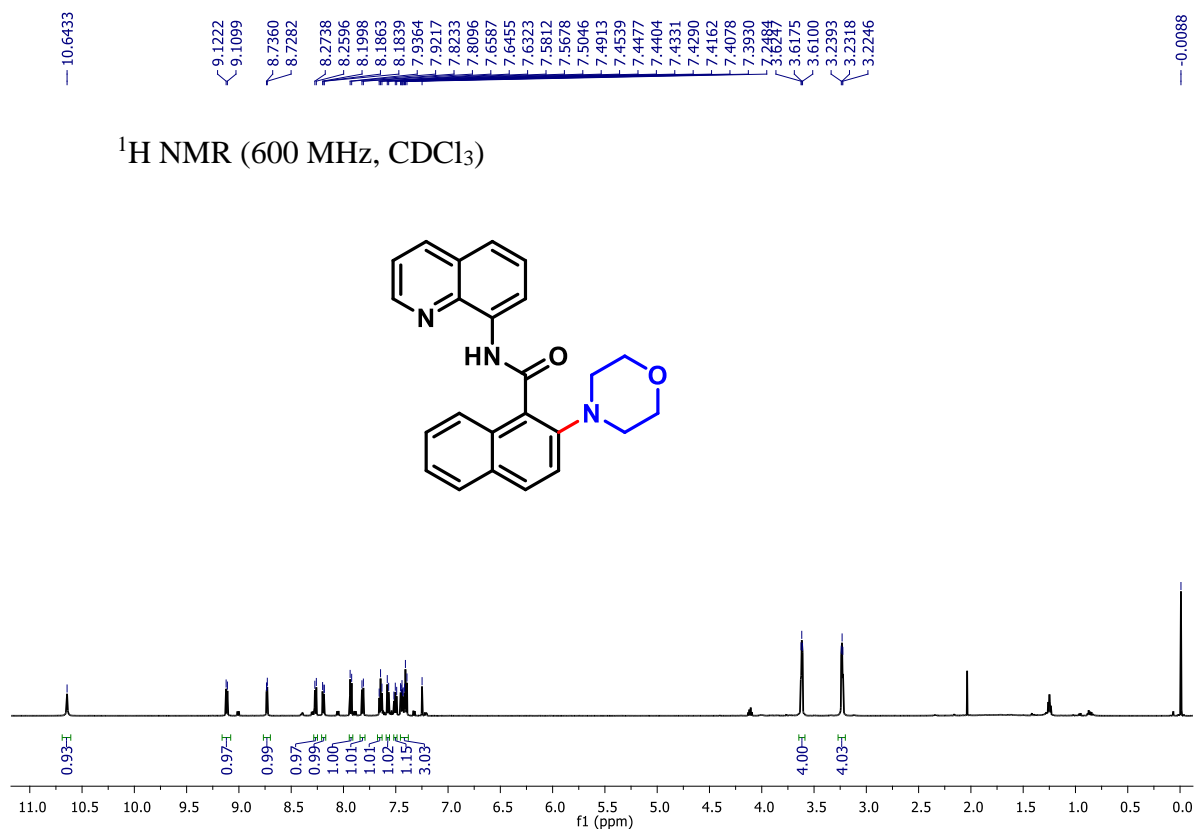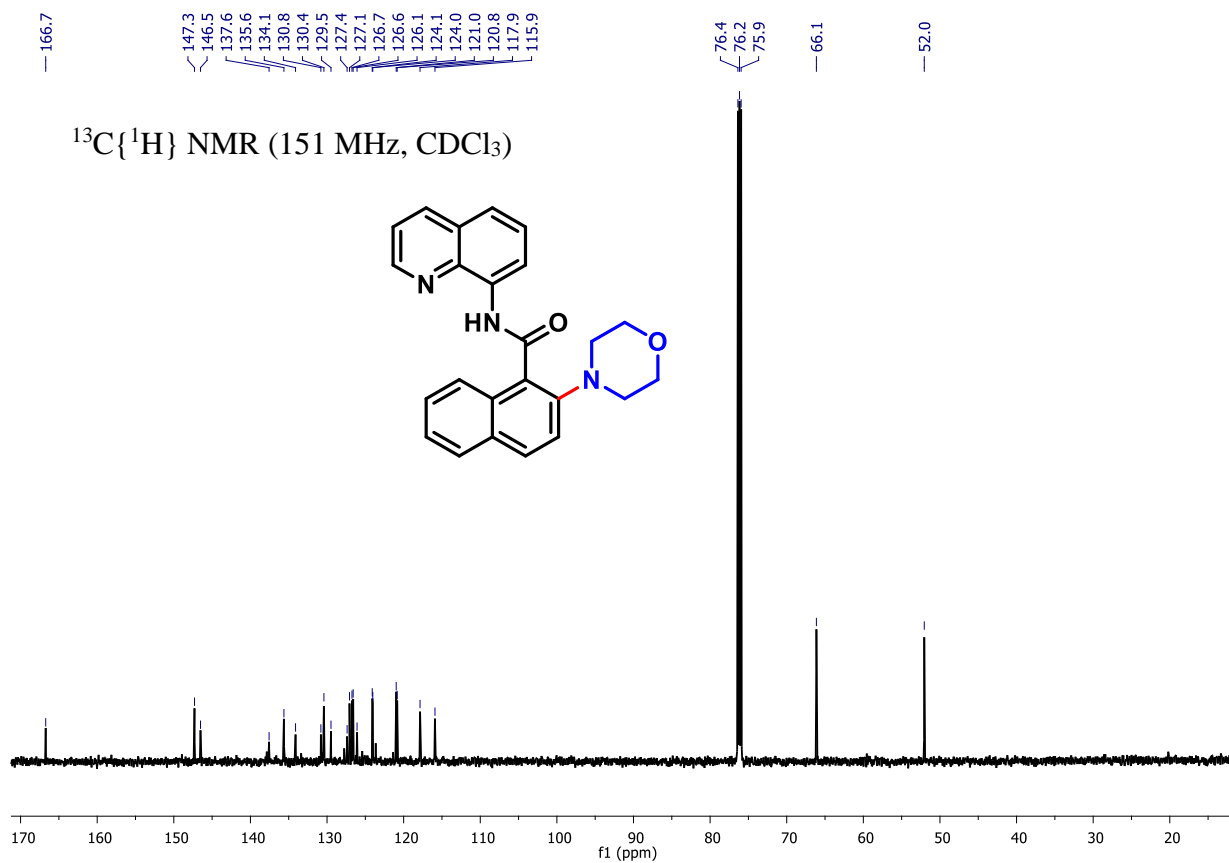



**2-thiomorpholino-N-(quinolin-8-yl)naphthamide (5p):**

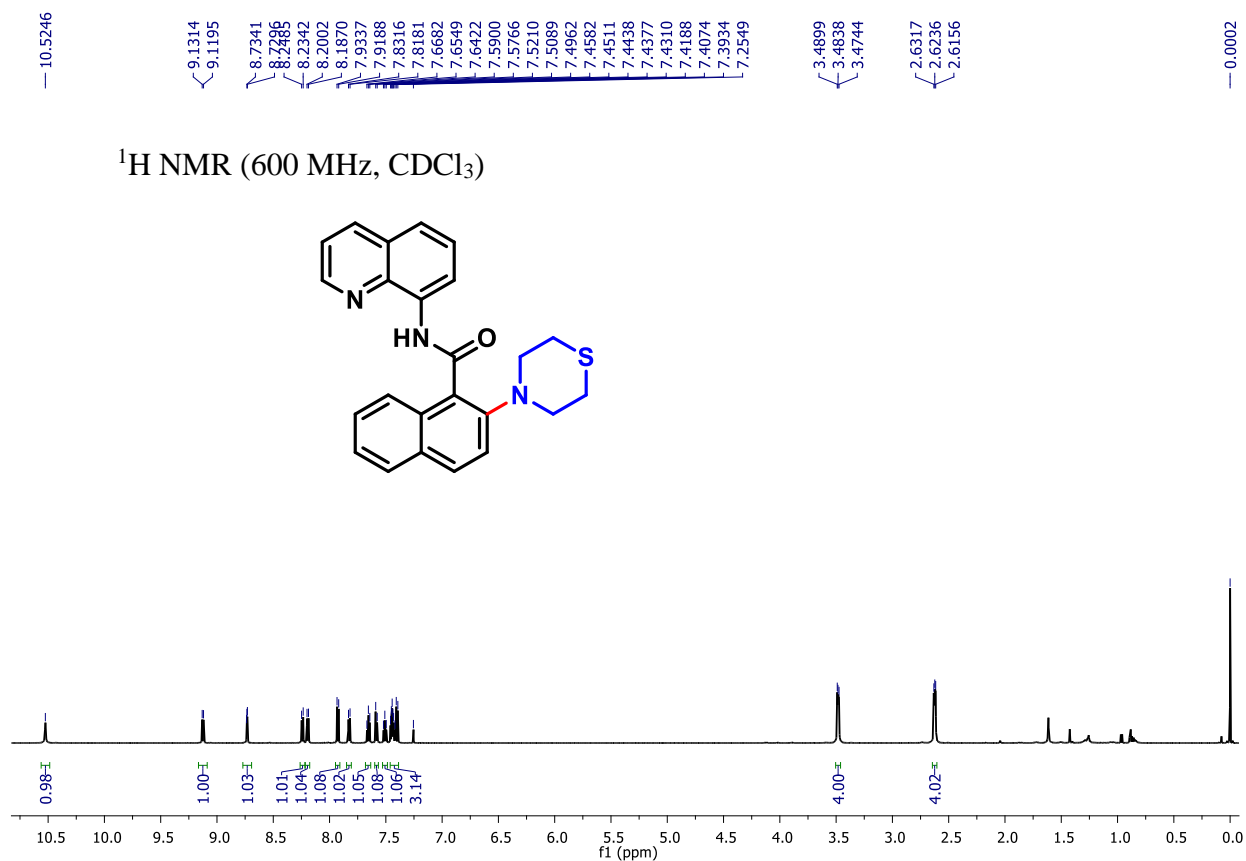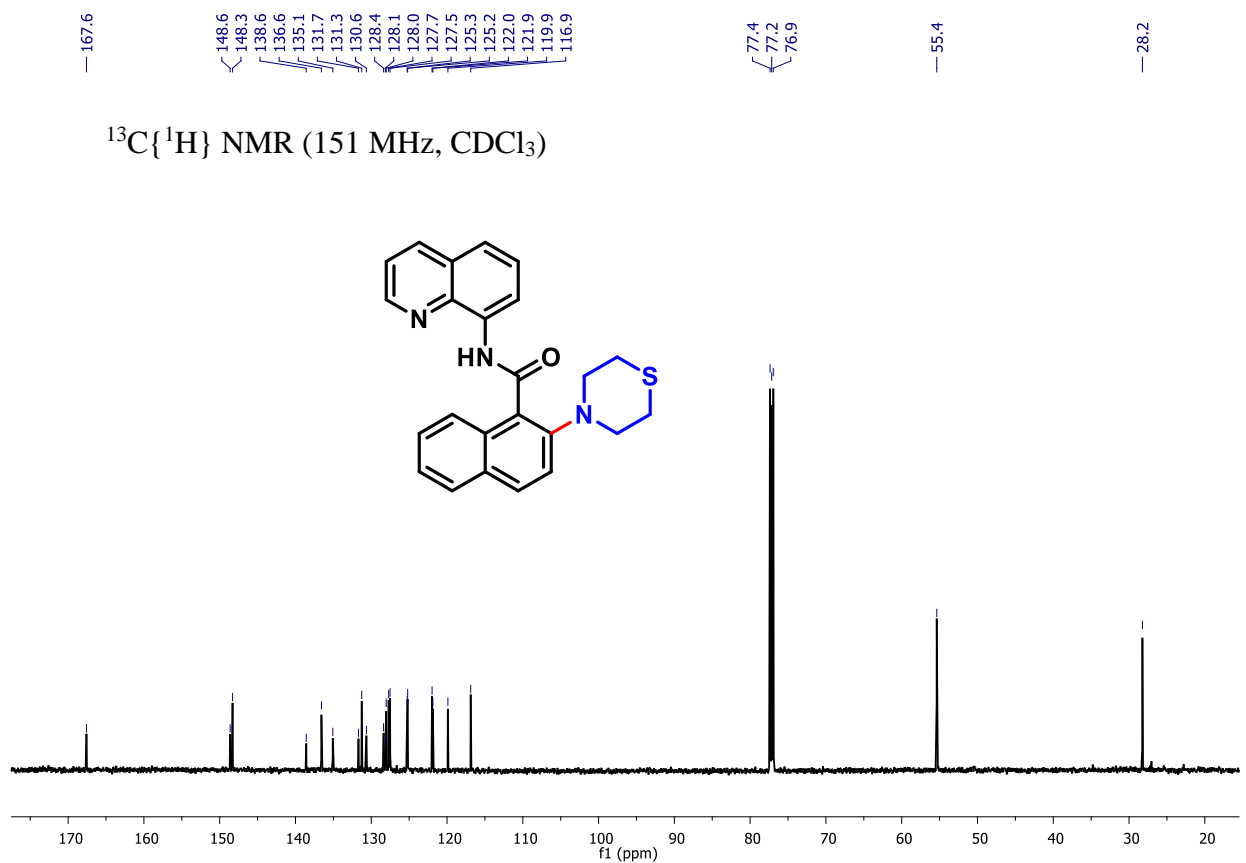

### 3-(Morpholino)-N-(quinolin-8-yl)thiophenecarboxamide (5q):

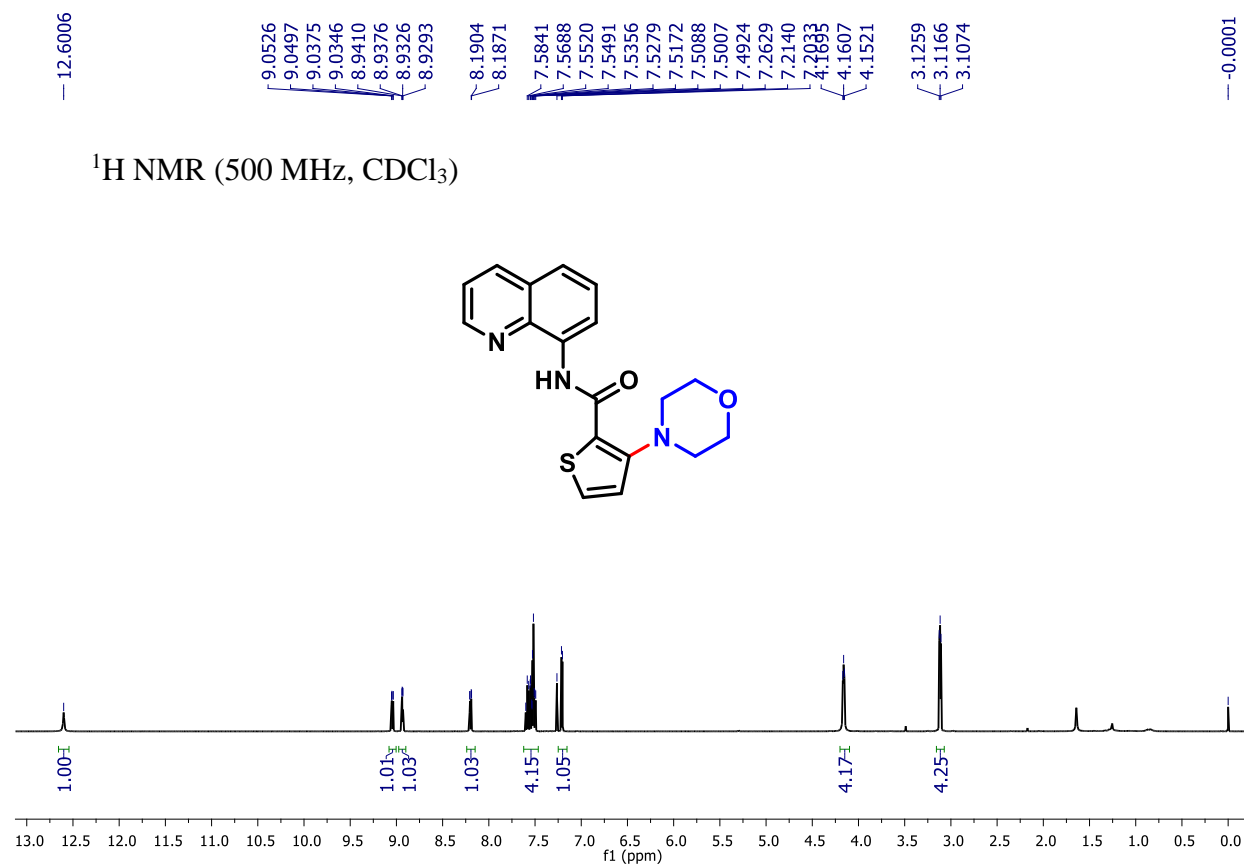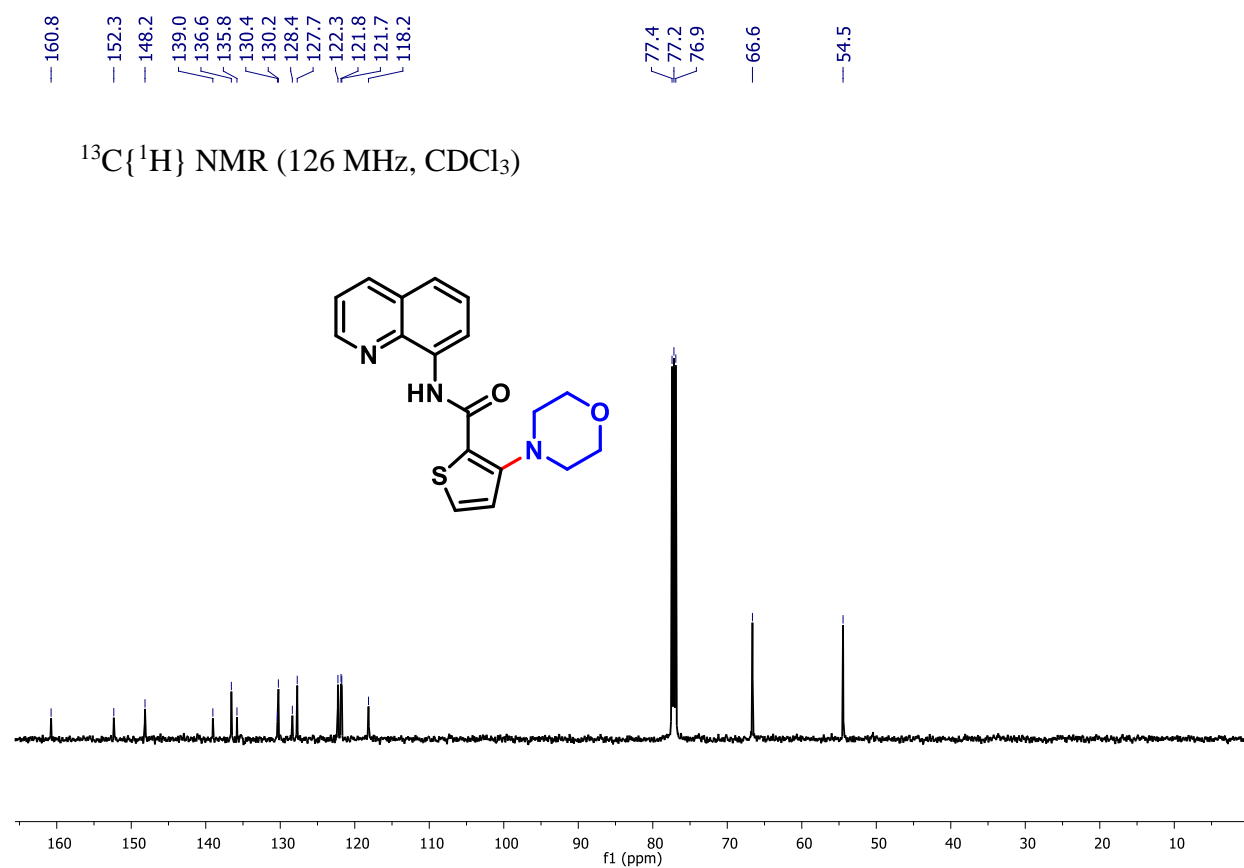

**2-(3,4-dihydroisoquinolin-2(1H)-yl)-N-(quinolin-8-yl)benzamide (5r):**

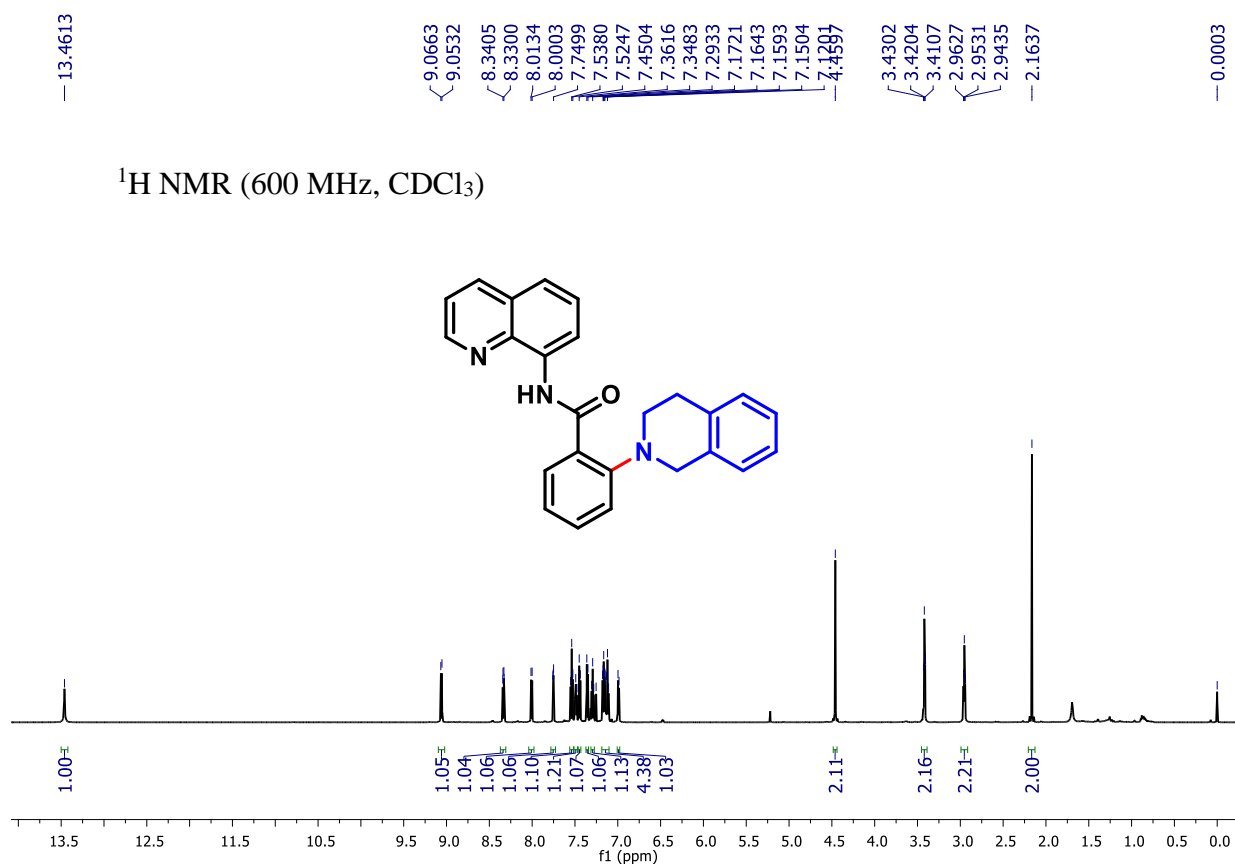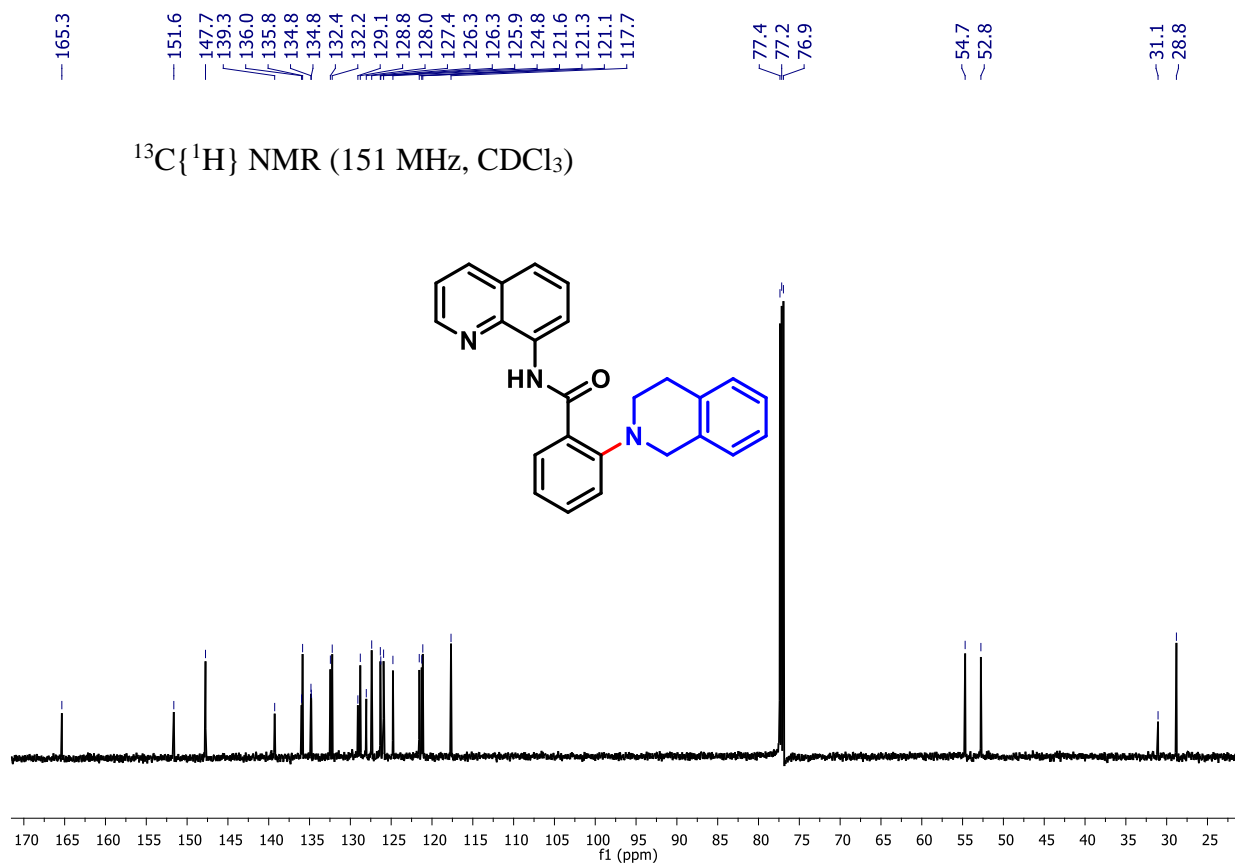

**2-(4-methylpiperazin-1-yl)-N-(quinolin-8-yl)benzamide (5s):**

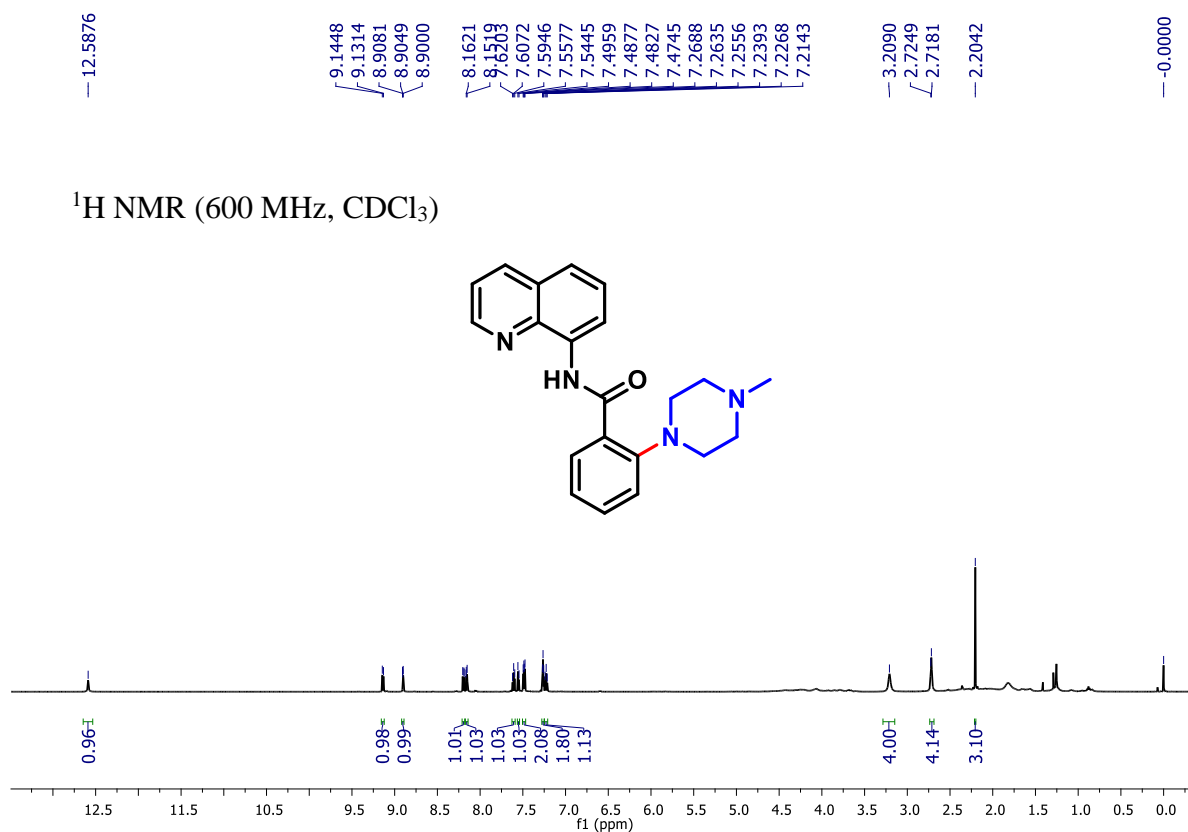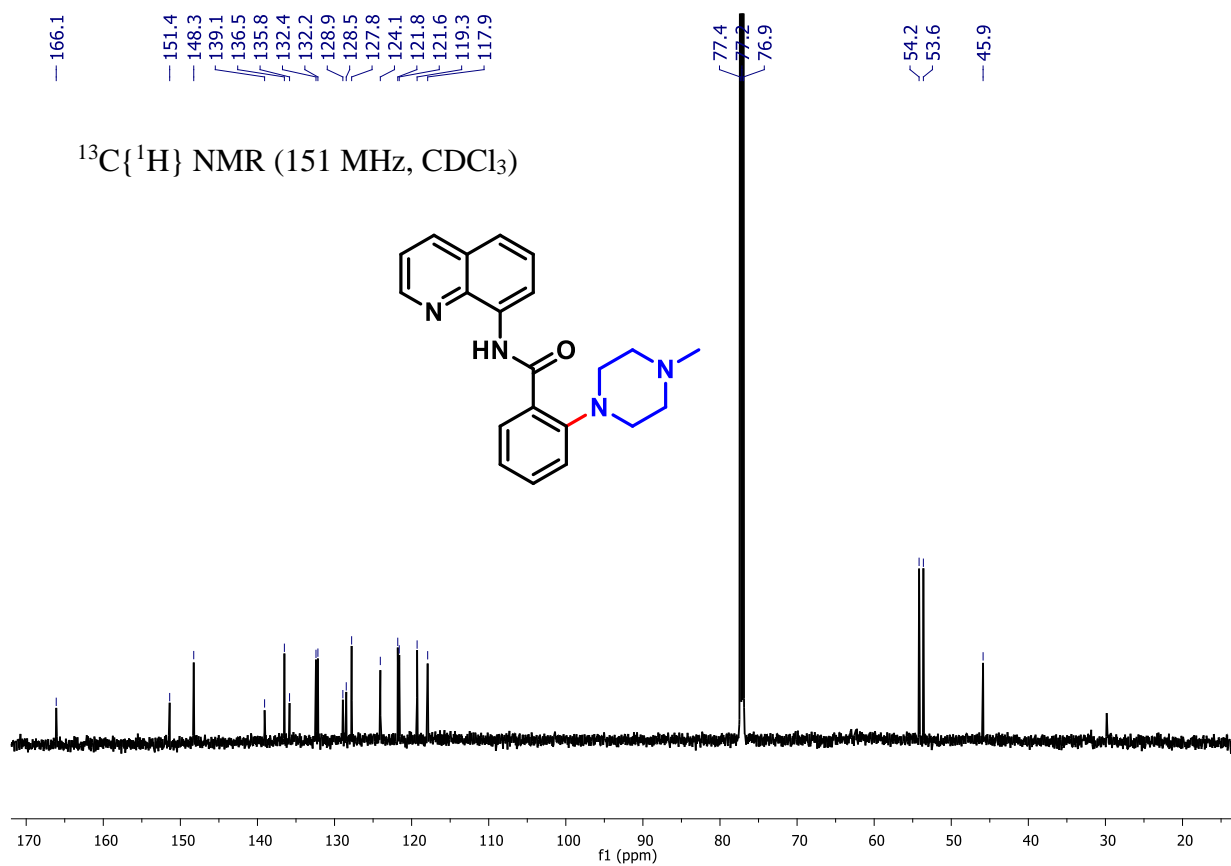

**2-(benzyl)(methyl)amino-N-(quinolin-8-yl)benzamide (5s):**

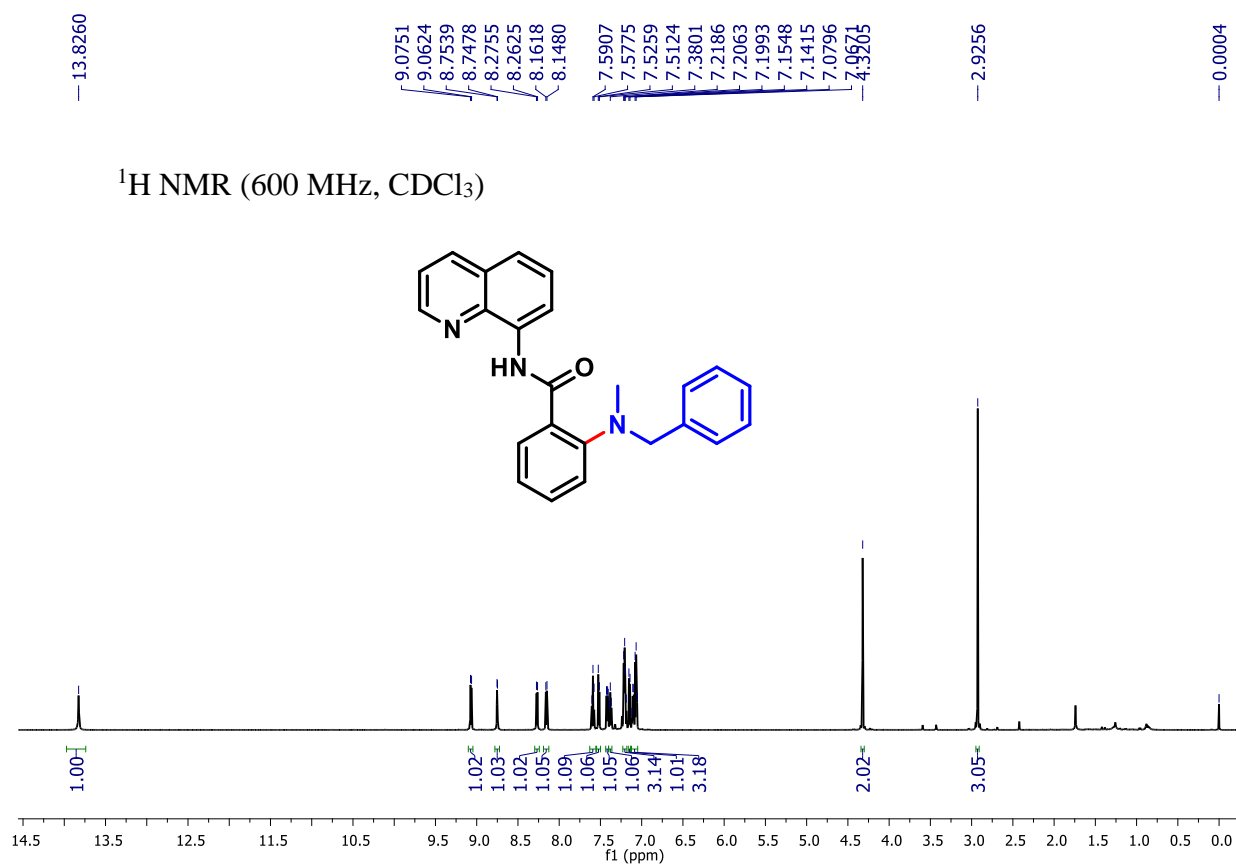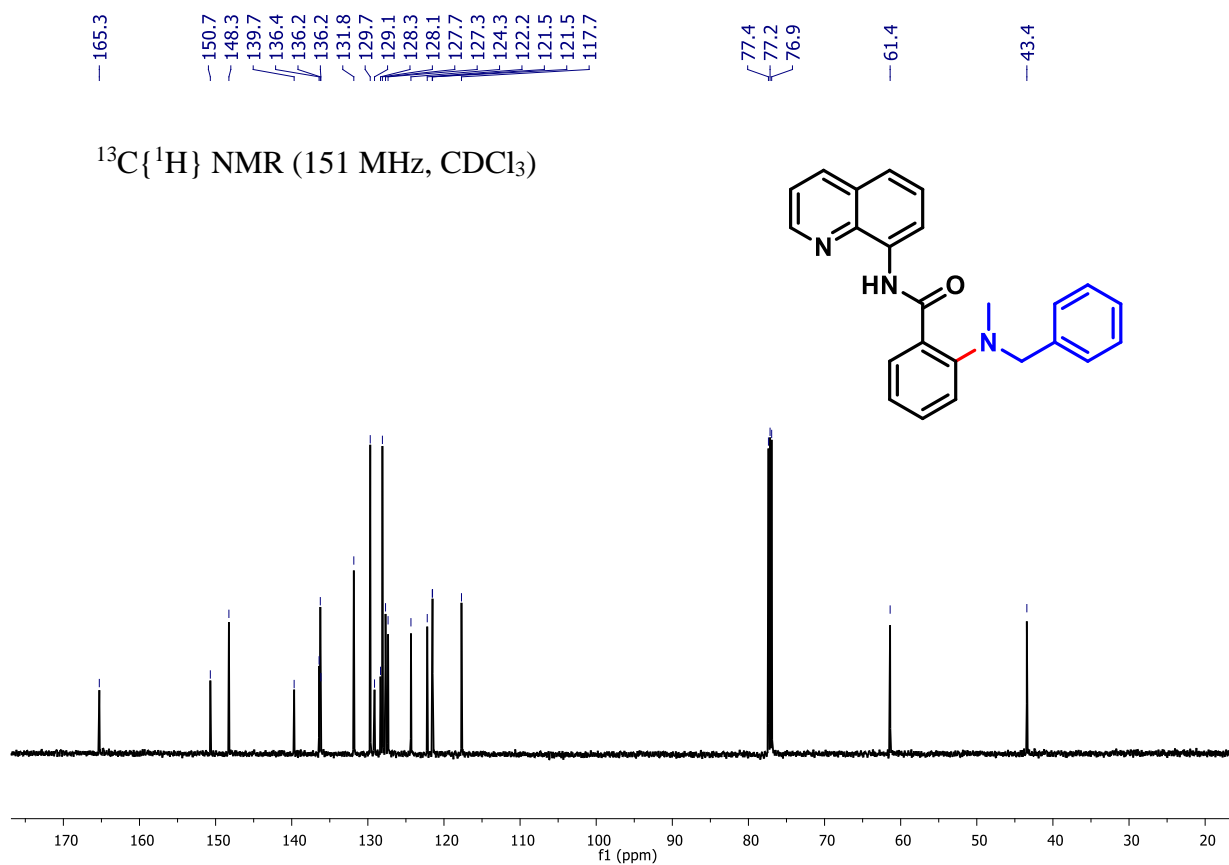

4. X-ray crystallographic data: Compound **3r** (CCDC – 2034527)

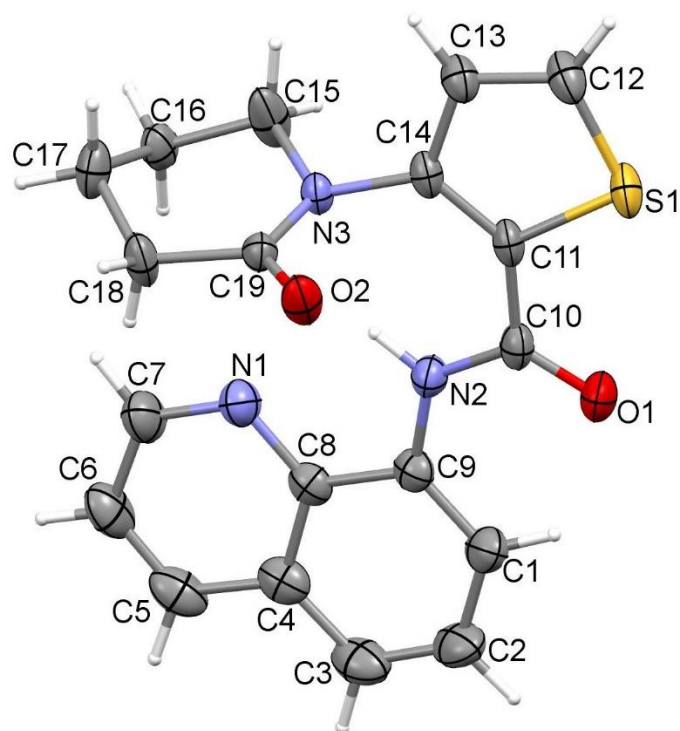

**Figure S8.** ORTEP diagram of the organic compound **3r** with atom numbering scheme (50% probability factor for the thermal ellipsoids). Crystal growth from mixed solvent ethyl acetate: hexane (50:50).

**Table S2: Crystal data and structure refinement for 3r**

|                                             |                                                                 |
|---------------------------------------------|-----------------------------------------------------------------|
| Identification code                         | 3r                                                              |
| Empirical formula                           | C <sub>19</sub> H <sub>17</sub> N <sub>3</sub> O <sub>2</sub> S |
| Formula weight                              | 351.41                                                          |
| Temperature/K                               | 180.(2)                                                         |
| Crystal system                              | orthorhombic                                                    |
| Space group                                 | P2 <sub>1</sub> 2 <sub>1</sub> 2 <sub>1</sub>                   |
| a/Å                                         | 5.7640(2)                                                       |
| b/Å                                         | 16.4028(5)                                                      |
| c/Å                                         | 17.1645(5)                                                      |
| α/°                                         | 90                                                              |
| β/°                                         | 90                                                              |
| γ/°                                         | 90                                                              |
| Volume/Å <sup>3</sup>                       | 1622.83(9)                                                      |
| Z                                           | 4                                                               |
| ρ <sub>calc</sub> /cm <sup>3</sup>          | 1.438                                                           |
| μ/mm <sup>-1</sup>                          | 0.218                                                           |
| F(000)                                      | 736.0                                                           |
| Crystal size/mm <sup>3</sup>                | 0.412 × 0.089 × 0.050                                           |
| Radiation                                   | MoKα (λ = 0.71073)                                              |
| 2θ range for data collection/°              | 4.74 to 61.02                                                   |
| Index ranges                                | -8 ≤ h ≤ 8, -23 ≤ k ≤ 23, -24 ≤ l ≤ 24                          |
| Reflections collected                       | 46779                                                           |
| Independent reflections                     | 4947 [R <sub>int</sub> = 0.0692, R <sub>sigma</sub> = 0.0428]   |
| Data/restraints/parameters                  | 4947/0/294                                                      |
| Goodness-of-fit on F <sup>2</sup>           | 1.085                                                           |
| Final R indexes [I ≥ 2σ (I)]                | R <sub>1</sub> = 0.0427, wR <sub>2</sub> = 0.0806               |
| Final R indexes [all data]                  | R <sub>1</sub> = 0.0696, wR <sub>2</sub> = 0.0926               |
| Largest diff. peak/hole / e Å <sup>-3</sup> | 0.21/-0.28                                                      |
| Flack parameter                             | 0.00(3)                                                         |

**X-ray crystallographic data: Compound 5d (CCDC – 2034528)**

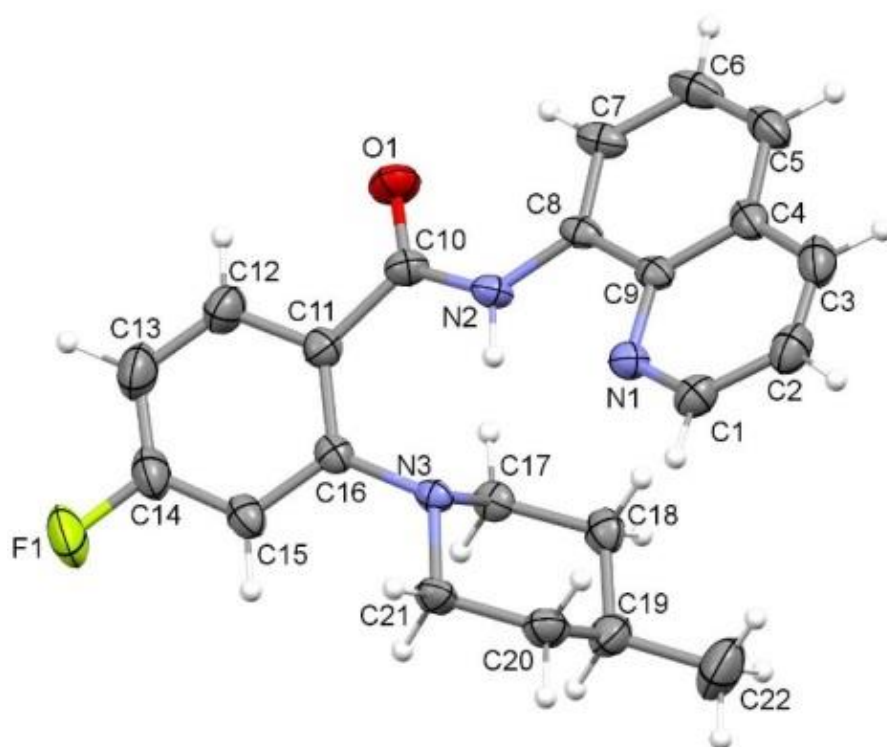

**Figure S 9:** ORTEP diagram of the organic compound **5d** with atom numbering scheme (50% probability factor for the thermal ellipsoids) Crystal growth from mixed solvent ethyl acetate: hexane (50:50).



**Table S3: Crystal data and structure refinement for 5d**

|                                                |                                                                |
|------------------------------------------------|----------------------------------------------------------------|
| Identification code                            | 5d                                                             |
| Empirical formula                              | C <sub>22</sub> H <sub>22</sub> FN <sub>3</sub> O              |
| Formula weight                                 | 363.42                                                         |
| Temperature/K                                  | 150.(2)                                                        |
| Crystal system                                 | orthorhombic                                                   |
| Space group                                    | Pbca                                                           |
| a/Å                                            | 14.956(3)                                                      |
| b/Å                                            | 12.299(3)                                                      |
| c/Å                                            | 20.468(4)                                                      |
| $\alpha/^\circ$                                | 90                                                             |
| $\beta/^\circ$                                 | 90                                                             |
| $\gamma/^\circ$                                | 90                                                             |
| Volume/Å <sup>3</sup>                          | 3765.0(13)                                                     |
| Z                                              | 8                                                              |
| $\rho_{\text{calc}}/\text{cm}^3$               | 1.282                                                          |
| $\mu/\text{mm}^{-1}$                           | 0.087                                                          |
| F(000)                                         | 1536.0                                                         |
| Crystal size/mm <sup>3</sup>                   | 0.393 × 0.268 × 0.186                                          |
| Radiation                                      | MoK $\alpha$ ( $\lambda$ = 0.71073)                            |
| 2 $\Theta$ range for data collection/ $^\circ$ | 4.72 to 70                                                     |
| Index ranges                                   | -24 ≤ h ≤ 24, -19 ≤ k ≤ 19, -32 ≤ l ≤ 32                       |
| Reflections collected                          | 56279                                                          |
| Independent reflections                        | 8245 [ $R_{\text{int}}$ = 0.0772, $R_{\text{sigma}}$ = 0.0490] |
| Data/restraints/parameters                     | 8245/0/332                                                     |
| Goodness-of-fit on F <sup>2</sup>              | 1.038                                                          |
| Final R indexes [ $I \geq 2\sigma(I)$ ]        | $R_1$ = 0.0522, $wR_2$ = 0.1193                                |
| Final R indexes [all data]                     | $R_1$ = 0.1111, $wR_2$ = 0.1571                                |
| Largest diff. peak/hole / e Å <sup>-3</sup>    | 0.33/-0.21                                                     |

**X-ray crystallographic data: Compound 5i (CCDC – 2034529)**

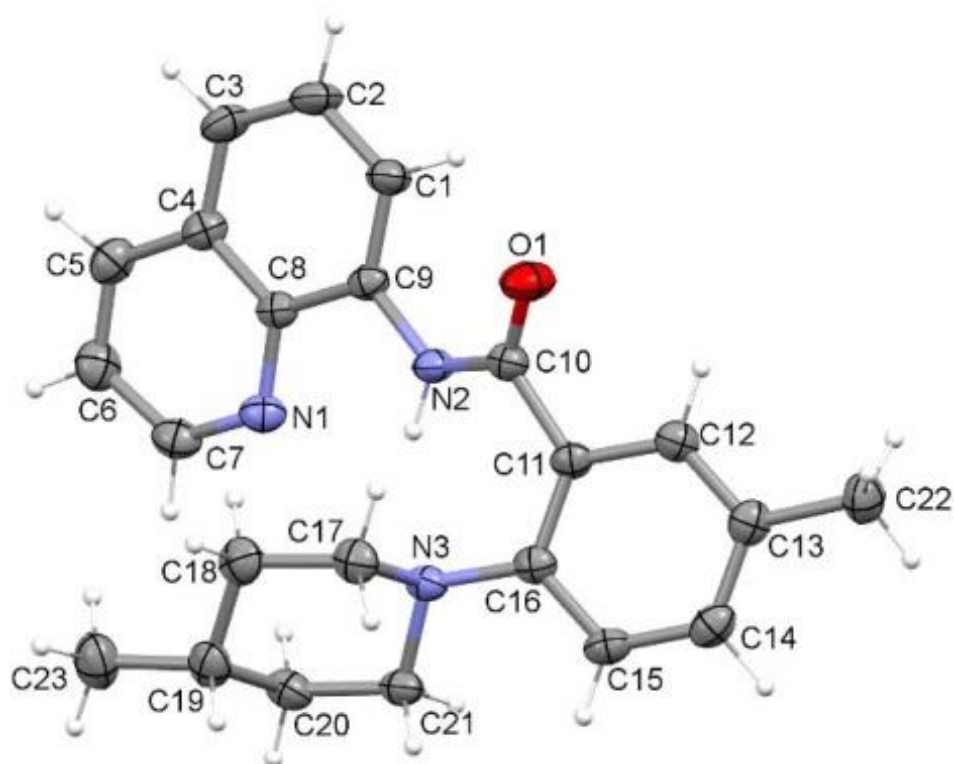

**Figure S 10:** ORTEP diagram of the organic compound **5i** with atom numbering scheme (50% probability factor for the thermal ellipsoids) Crystal growth from mixed solvent ethyl acetate: hexane (50:50).

**Table S4: Crystal data and structure refinement for 5i.**

|                                             |                                                               |
|---------------------------------------------|---------------------------------------------------------------|
| Identification code                         | 5i                                                            |
| Empirical formula                           | C <sub>23</sub> H <sub>25</sub> N <sub>3</sub> O              |
| Formula weight                              | 359.46                                                        |
| Temperature/K                               | 155.(2)                                                       |
| Crystal system                              | monoclinic                                                    |
| Space group                                 | P2 <sub>1</sub>                                               |
| a/Å                                         | 8.6945(16)                                                    |
| b/Å                                         | 7.7258(14)                                                    |
| c/Å                                         | 14.163(3)                                                     |
| α/°                                         | 90                                                            |
| β/°                                         | 97.573(5)                                                     |
| γ/°                                         | 90                                                            |
| Volume/Å <sup>3</sup>                       | 943.1(3)                                                      |
| Z                                           | 2                                                             |
| ρ <sub>calc</sub> /cm <sup>3</sup>          | 1.266                                                         |
| μ/mm <sup>-1</sup>                          | 0.079                                                         |
| F(000)                                      | 384.0                                                         |
| Crystal size/mm <sup>3</sup>                | 0.364 × 0.324 × 0.112                                         |
| Radiation                                   | MoKα (λ = 0.71073)                                            |
| 2Θ range for data collection/°              | 4.72 to 63.18                                                 |
| Index ranges                                | -12 ≤ h ≤ 12, -11 ≤ k ≤ 11, -20 ≤ l ≤ 20                      |
| Reflections collected                       | 14071                                                         |
| Independent reflections                     | 6231 [R <sub>int</sub> = 0.0521, R <sub>sigma</sub> = 0.0733] |
| Data/restraints/parameters                  | 6231/1/344                                                    |
| Goodness-of-fit on F <sup>2</sup>           | 1.054                                                         |
| Final R indexes [I ≥ 2σ (I)]                | R <sub>1</sub> = 0.0582, wR <sub>2</sub> = 0.1119             |
| Final R indexes [all data]                  | R <sub>1</sub> = 0.0971, wR <sub>2</sub> = 0.1318             |
| Largest diff. peak/hole / e Å <sup>-3</sup> | 0.23/-0.26                                                    |
| Flack parameter                             | 0.3(10)                                                       |
